# Supplementary material for: Signal categorization by foraging animals depends on ecological diversity
Source: eLife journal article supplement (doi:10.7554/elife.43965), 2019-04-25
Supplement: supp [file elife-43965-supp-v1.zip]

Archive with 6 entries (6 files):
- elife_poa_e43965_Transparent_Reporting_File.docx
- elife_poa_e43965_Figure_1_figure_supplement_2.pdf
- elife_poa_e43965_Figure_1_source_data_1.csv
- elife_poa_e43965_Supplementary_File_1.pdf
- elife_poa_e43965_Figure_1_figure_supplement_1.pdf
- elife_poa_e43965_Figure_2_figure_supplement_1.pdf
