# Supplementary material for: Signal categorization by foraging animals depends on ecological diversity
Source: eLife journal article supplement (doi:10.7554/elife.43965), 2019-04-25
Supplement: supp [file elife-43965-supp-v1.zip › elife_poa_e43965_Figure_1_source_data_1.csv]

treatment	IDno	combined	attacks	possible	color	shape	index	experiment	unRel	Rel	unRelComb	RelComb	ord
1	1189458_24_Jul_2018_15_52_30.csv	bluecircle	3	3	blue	circle	1	1	good	G1	good	G	4
1	1189458_24_Jul_2018_15_52_30.csv	bluecross	0	3	blue	cross	2	1	good	Z1	good	Z	4
1	1189458_24_Jul_2018_15_52_30.csv	bluestar	0	3	blue	star	3	1	good	B1	good	B	4
1	1189458_24_Jul_2018_15_52_30.csv	bluetriangle	0	3	blue	triangle	4	1	good	Z2	good	Z	4
1	1189458_24_Jul_2018_15_52_30.csv	purplecircle	3	3	purple	circle	5	1	zed1	G1	zed	G	4
1	1189458_24_Jul_2018_15_52_30.csv	purplestar	0	3	purple	star	6	1	zed1	B1	zed	B	4
1	1189458_24_Jul_2018_15_52_30.csv	redcircle	3	3	red	circle	7	1	zed2	G1	zed	G	4
1	1189458_24_Jul_2018_15_52_30.csv	redstar	0	3	red	star	8	1	zed2	B1	zed	B	4
1	1189458_24_Jul_2018_15_52_30.csv	yellowcircle	3	3	yellow	circle	9	1	bad	G1	bad	G	4
1	1189458_24_Jul_2018_15_52_30.csv	yellowcross	0	3	yellow	cross	10	1	bad	Z1	bad	Z	4
1	1189458_24_Jul_2018_15_52_30.csv	yellowstar	0	3	yellow	star	11	1	bad	B1	bad	B	4
1	1189458_24_Jul_2018_15_52_30.csv	yellowtriangle	0	3	yellow	triangle	12	1	bad	Z2	bad	Z	4
1	2987451_19_Jul_2018_12_23_35.csv	bluecircle	2	3	blue	circle	361	1	good	G1	good	G	3
1	2987451_19_Jul_2018_12_23_35.csv	bluecross	0	3	blue	cross	362	1	good	Z1	good	Z	3
1	2987451_19_Jul_2018_12_23_35.csv	bluestar	0	3	blue	star	363	1	good	B1	good	B	3
1	2987451_19_Jul_2018_12_23_35.csv	bluetriangle	0	3	blue	triangle	364	1	good	Z2	good	Z	3
1	2987451_19_Jul_2018_12_23_35.csv	purplecircle	3	3	purple	circle	365	1	zed1	G1	zed	G	3
1	2987451_19_Jul_2018_12_23_35.csv	purplestar	0	3	purple	star	366	1	zed1	B1	zed	B	3
1	2987451_19_Jul_2018_12_23_35.csv	redcircle	3	3	red	circle	367	1	zed2	G1	zed	G	3
1	2987451_19_Jul_2018_12_23_35.csv	redstar	0	3	red	star	368	1	zed2	B1	zed	B	3
1	2987451_19_Jul_2018_12_23_35.csv	yellowcircle	2	3	yellow	circle	369	1	bad	G1	bad	G	3
1	2987451_19_Jul_2018_12_23_35.csv	yellowcross	0	3	yellow	cross	370	1	bad	Z1	bad	Z	3
1	2987451_19_Jul_2018_12_23_35.csv	yellowstar	0	3	yellow	star	371	1	bad	B1	bad	B	3
1	2987451_19_Jul_2018_12_23_35.csv	yellowtriangle	0	3	yellow	triangle	372	1	bad	Z2	bad	Z	3
1	5026349_24_Jul_2018_13_40_33.csv	bluecircle	3	3	blue	circle	1069	1	good	G1	good	G	2
1	5026349_24_Jul_2018_13_40_33.csv	bluecross	0	3	blue	cross	1070	1	good	Z1	good	Z	2
1	5026349_24_Jul_2018_13_40_33.csv	bluestar	0	3	blue	star	1071	1	good	B1	good	B	2
1	5026349_24_Jul_2018_13_40_33.csv	bluetriangle	0	3	blue	triangle	1072	1	good	Z2	good	Z	2
1	5026349_24_Jul_2018_13_40_33.csv	purplecircle	3	3	purple	circle	1073	1	zed1	G1	zed	G	2
1	5026349_24_Jul_2018_13_40_33.csv	purplestar	0	3	purple	star	1074	1	zed1	B1	zed	B	2
1	5026349_24_Jul_2018_13_40_33.csv	redcircle	3	3	red	circle	1075	1	zed2	G1	zed	G	2
1	5026349_24_Jul_2018_13_40_33.csv	redstar	0	3	red	star	1076	1	zed2	B1	zed	B	2
1	5026349_24_Jul_2018_13_40_33.csv	yellowcircle	3	3	yellow	circle	1077	1	bad	G1	bad	G	2
1	5026349_24_Jul_2018_13_40_33.csv	yellowcross	0	3	yellow	cross	1078	1	bad	Z1	bad	Z	2
1	5026349_24_Jul_2018_13_40_33.csv	yellowstar	0	3	yellow	star	1079	1	bad	B1	bad	B	2
1	5026349_24_Jul_2018_13_40_33.csv	yellowtriangle	0	3	yellow	triangle	1080	1	bad	Z2	bad	Z	2
1	5121335_01_Aug_2018_15_25_45.csv	bluecircle	3	3	blue	circle	1129	1	good	G1	good	G	5
1	5121335_01_Aug_2018_15_25_45.csv	bluecross	0	3	blue	cross	1130	1	good	Z1	good	Z	5
1	5121335_01_Aug_2018_15_25_45.csv	bluestar	0	3	blue	star	1131	1	good	B1	good	B	5
1	5121335_01_Aug_2018_15_25_45.csv	bluetriangle	0	3	blue	triangle	1132	1	good	Z2	good	Z	5
1	5121335_01_Aug_2018_15_25_45.csv	purplecircle	0	3	purple	circle	1133	1	zed1	G1	zed	G	5
1	5121335_01_Aug_2018_15_25_45.csv	purplestar	0	3	purple	star	1134	1	zed1	B1	zed	B	5
1	5121335_01_Aug_2018_15_25_45.csv	redcircle	0	3	red	circle	1135	1	zed2	G1	zed	G	5
1	5121335_01_Aug_2018_15_25_45.csv	redstar	0	3	red	star	1136	1	zed2	B1	zed	B	5
1	5121335_01_Aug_2018_15_25_45.csv	yellowcircle	3	3	yellow	circle	1137	1	bad	G1	bad	G	5
1	5121335_01_Aug_2018_15_25_45.csv	yellowcross	0	3	yellow	cross	1138	1	bad	Z1	bad	Z	5
1	5121335_01_Aug_2018_15_25_45.csv	yellowstar	0	3	yellow	star	1139	1	bad	B1	bad	B	5
1	5121335_01_Aug_2018_15_25_45.csv	yellowtriangle	0	3	yellow	triangle	1140	1	bad	Z2	bad	Z	5
1	5235166_19_Jul_2018_13_16_31.csv	bluecircle	0	3	blue	circle	1189	1	good	G1	good	G	4
1	5235166_19_Jul_2018_13_16_31.csv	bluecross	0	3	blue	cross	1190	1	good	Z1	good	Z	4
1	5235166_19_Jul_2018_13_16_31.csv	bluestar	3	3	blue	star	1191	1	good	B1	good	B	4
1	5235166_19_Jul_2018_13_16_31.csv	bluetriangle	0	3	blue	triangle	1192	1	good	Z2	good	Z	4
1	5235166_19_Jul_2018_13_16_31.csv	purplecircle	3	3	purple	circle	1193	1	zed1	G1	zed	G	4
1	5235166_19_Jul_2018_13_16_31.csv	purplestar	3	3	purple	star	1194	1	zed1	B1	zed	B	4
1	5235166_19_Jul_2018_13_16_31.csv	redcircle	3	3	red	circle	1195	1	zed2	G1	zed	G	4
1	5235166_19_Jul_2018_13_16_31.csv	redstar	3	3	red	star	1196	1	zed2	B1	zed	B	4
1	5235166_19_Jul_2018_13_16_31.csv	yellowcircle	1	3	yellow	circle	1197	1	bad	G1	bad	G	4
1	5235166_19_Jul_2018_13_16_31.csv	yellowcross	0	3	yellow	cross	1198	1	bad	Z1	bad	Z	4
1	5235166_19_Jul_2018_13_16_31.csv	yellowstar	3	3	yellow	star	1199	1	bad	B1	bad	B	4
1	5235166_19_Jul_2018_13_16_31.csv	yellowtriangle	0	3	yellow	triangle	1200	1	bad	Z2	bad	Z	4
1	5330634_23_Jul_2018_14_06_01.csv	bluecircle	0	3	blue	circle	1309	1	good	G1	good	G	3
1	5330634_23_Jul_2018_14_06_01.csv	bluecross	0	3	blue	cross	1310	1	good	Z1	good	Z	3
1	5330634_23_Jul_2018_14_06_01.csv	bluestar	0	3	blue	star	1311	1	good	B1	good	B	3
1	5330634_23_Jul_2018_14_06_01.csv	bluetriangle	0	3	blue	triangle	1312	1	good	Z2	good	Z	3
1	5330634_23_Jul_2018_14_06_01.csv	purplecircle	3	3	purple	circle	1313	1	zed1	G1	zed	G	3
1	5330634_23_Jul_2018_14_06_01.csv	purplestar	3	3	purple	star	1314	1	zed1	B1	zed	B	3
1	5330634_23_Jul_2018_14_06_01.csv	redcircle	0	3	red	circle	1315	1	zed2	G1	zed	G	3
1	5330634_23_Jul_2018_14_06_01.csv	redstar	0	3	red	star	1316	1	zed2	B1	zed	B	3
1	5330634_23_Jul_2018_14_06_01.csv	yellowcircle	0	3	yellow	circle	1317	1	bad	G1	bad	G	3
1	5330634_23_Jul_2018_14_06_01.csv	yellowcross	1	3	yellow	cross	1318	1	bad	Z1	bad	Z	3
1	5330634_23_Jul_2018_14_06_01.csv	yellowstar	3	3	yellow	star	1319	1	bad	B1	bad	B	3
1	5330634_23_Jul_2018_14_06_01.csv	yellowtriangle	0	3	yellow	triangle	1320	1	bad	Z2	bad	Z	3
1	6001869_19_Jul_2018_13_24_44.csv	bluecircle	3	3	blue	circle	1429	1	good	G1	good	G	5
1	6001869_19_Jul_2018_13_24_44.csv	bluecross	0	3	blue	cross	1430	1	good	Z1	good	Z	5
1	6001869_19_Jul_2018_13_24_44.csv	bluestar	0	3	blue	star	1431	1	good	B1	good	B	5
1	6001869_19_Jul_2018_13_24_44.csv	bluetriangle	0	3	blue	triangle	1432	1	good	Z2	good	Z	5
1	6001869_19_Jul_2018_13_24_44.csv	purplecircle	1	3	purple	circle	1433	1	zed1	G1	zed	G	5
1	6001869_19_Jul_2018_13_24_44.csv	purplestar	2	3	purple	star	1434	1	zed1	B1	zed	B	5
1	6001869_19_Jul_2018_13_24_44.csv	redcircle	1	3	red	circle	1435	1	zed2	G1	zed	G	5
1	6001869_19_Jul_2018_13_24_44.csv	redstar	1	3	red	star	1436	1	zed2	B1	zed	B	5
1	6001869_19_Jul_2018_13_24_44.csv	yellowcircle	3	3	yellow	circle	1437	1	bad	G1	bad	G	5
1	6001869_19_Jul_2018_13_24_44.csv	yellowcross	3	3	yellow	cross	1438	1	bad	Z1	bad	Z	5
1	6001869_19_Jul_2018_13_24_44.csv	yellowstar	0	3	yellow	star	1439	1	bad	B1	bad	B	5
1	6001869_19_Jul_2018_13_24_44.csv	yellowtriangle	0	3	yellow	triangle	1440	1	bad	Z2	bad	Z	5
1	6571929_24_Jul_2018_18_24_26.csv	bluecircle	0	3	blue	circle	1669	1	good	G1	good	G	1
1	6571929_24_Jul_2018_18_24_26.csv	bluecross	0	3	blue	cross	1670	1	good	Z1	good	Z	1
1	6571929_24_Jul_2018_18_24_26.csv	bluestar	0	3	blue	star	1671	1	good	B1	good	B	1
1	6571929_24_Jul_2018_18_24_26.csv	bluetriangle	0	3	blue	triangle	1672	1	good	Z2	good	Z	1
1	6571929_24_Jul_2018_18_24_26.csv	purplecircle	3	3	purple	circle	1673	1	zed1	G1	zed	G	1
1	6571929_24_Jul_2018_18_24_26.csv	purplestar	3	3	purple	star	1674	1	zed1	B1	zed	B	1
1	6571929_24_Jul_2018_18_24_26.csv	redcircle	3	3	red	circle	1675	1	zed2	G1	zed	G	1
1	6571929_24_Jul_2018_18_24_26.csv	redstar	3	3	red	star	1676	1	zed2	B1	zed	B	1
1	6571929_24_Jul_2018_18_24_26.csv	yellowcircle	0	3	yellow	circle	1677	1	bad	G1	bad	G	1
1	6571929_24_Jul_2018_18_24_26.csv	yellowcross	0	3	yellow	cross	1678	1	bad	Z1	bad	Z	1
1	6571929_24_Jul_2018_18_24_26.csv	yellowstar	0	3	yellow	star	1679	1	bad	B1	bad	B	1
1	6571929_24_Jul_2018_18_24_26.csv	yellowtriangle	3	3	yellow	triangle	1680	1	bad	Z2	bad	Z	1
1	7542477_02_Aug_2018_15_12_38.csv	bluecircle	3	3	blue	circle	1909	1	good	G1	good	G	5
1	7542477_02_Aug_2018_15_12_38.csv	bluecross	0	3	blue	cross	1910	1	good	Z1	good	Z	5
1	7542477_02_Aug_2018_15_12_38.csv	bluestar	0	3	blue	star	1911	1	good	B1	good	B	5
1	7542477_02_Aug_2018_15_12_38.csv	bluetriangle	0	3	blue	triangle	1912	1	good	Z2	good	Z	5
1	7542477_02_Aug_2018_15_12_38.csv	purplecircle	0	3	purple	circle	1913	1	zed1	G1	zed	G	5
1	7542477_02_Aug_2018_15_12_38.csv	purplestar	0	3	purple	star	1914	1	zed1	B1	zed	B	5
1	7542477_02_Aug_2018_15_12_38.csv	redcircle	0	3	red	circle	1915	1	zed2	G1	zed	G	5
1	7542477_02_Aug_2018_15_12_38.csv	redstar	0	3	red	star	1916	1	zed2	B1	zed	B	5
1	7542477_02_Aug_2018_15_12_38.csv	yellowcircle	3	3	yellow	circle	1917	1	bad	G1	bad	G	5
1	7542477_02_Aug_2018_15_12_38.csv	yellowcross	0	3	yellow	cross	1918	1	bad	Z1	bad	Z	5
1	7542477_02_Aug_2018_15_12_38.csv	yellowstar	0	3	yellow	star	1919	1	bad	B1	bad	B	5
1	7542477_02_Aug_2018_15_12_38.csv	yellowtriangle	0	3	yellow	triangle	1920	1	bad	Z2	bad	Z	5
1	7665085_24_Jul_2018_12_50_53.csv	bluecircle	3	3	blue	circle	2089	1	good	G1	good	G	3
1	7665085_24_Jul_2018_12_50_53.csv	bluecross	0	3	blue	cross	2090	1	good	Z1	good	Z	3
1	7665085_24_Jul_2018_12_50_53.csv	bluestar	0	3	blue	star	2091	1	good	B1	good	B	3
1	7665085_24_Jul_2018_12_50_53.csv	bluetriangle	0	3	blue	triangle	2092	1	good	Z2	good	Z	3
1	7665085_24_Jul_2018_12_50_53.csv	purplecircle	3	3	purple	circle	2093	1	zed1	G1	zed	G	3
1	7665085_24_Jul_2018_12_50_53.csv	purplestar	3	3	purple	star	2094	1	zed1	B1	zed	B	3
1	7665085_24_Jul_2018_12_50_53.csv	redcircle	0	3	red	circle	2095	1	zed2	G1	zed	G	3
1	7665085_24_Jul_2018_12_50_53.csv	redstar	0	3	red	star	2096	1	zed2	B1	zed	B	3
1	7665085_24_Jul_2018_12_50_53.csv	yellowcircle	3	3	yellow	circle	2097	1	bad	G1	bad	G	3
1	7665085_24_Jul_2018_12_50_53.csv	yellowcross	0	3	yellow	cross	2098	1	bad	Z1	bad	Z	3
1	7665085_24_Jul_2018_12_50_53.csv	yellowstar	0	3	yellow	star	2099	1	bad	B1	bad	B	3
1	7665085_24_Jul_2018_12_50_53.csv	yellowtriangle	0	3	yellow	triangle	2100	1	bad	Z2	bad	Z	3
1	9016068_24_Jul_2018_13_16_18.csv	bluecircle	3	3	blue	circle	2413	1	good	G1	good	G	1
1	9016068_24_Jul_2018_13_16_18.csv	bluecross	0	3	blue	cross	2414	1	good	Z1	good	Z	1
1	9016068_24_Jul_2018_13_16_18.csv	bluestar	0	3	blue	star	2415	1	good	B1	good	B	1
1	9016068_24_Jul_2018_13_16_18.csv	bluetriangle	0	3	blue	triangle	2416	1	good	Z2	good	Z	1
1	9016068_24_Jul_2018_13_16_18.csv	purplecircle	3	3	purple	circle	2417	1	zed1	G1	zed	G	1
1	9016068_24_Jul_2018_13_16_18.csv	purplestar	0	3	purple	star	2418	1	zed1	B1	zed	B	1
1	9016068_24_Jul_2018_13_16_18.csv	redcircle	3	3	red	circle	2419	1	zed2	G1	zed	G	1
1	9016068_24_Jul_2018_13_16_18.csv	redstar	0	3	red	star	2420	1	zed2	B1	zed	B	1
1	9016068_24_Jul_2018_13_16_18.csv	yellowcircle	3	3	yellow	circle	2421	1	bad	G1	bad	G	1
1	9016068_24_Jul_2018_13_16_18.csv	yellowcross	0	3	yellow	cross	2422	1	bad	Z1	bad	Z	1
1	9016068_24_Jul_2018_13_16_18.csv	yellowstar	0	3	yellow	star	2423	1	bad	B1	bad	B	1
1	9016068_24_Jul_2018_13_16_18.csv	yellowtriangle	0	3	yellow	triangle	2424	1	bad	Z2	bad	Z	1
10	1189458_24_Jul_2018_15_52_30.csv	bluecircle	0	3	blue	circle	25	3	bad	B1	bad	B	2
10	1189458_24_Jul_2018_15_52_30.csv	bluecross	0	3	blue	cross	26	3	bad	B2	bad	B	2
10	1189458_24_Jul_2018_15_52_30.csv	bluestar	0	3	blue	star	27	3	bad	G1	bad	G	2
10	1189458_24_Jul_2018_15_52_30.csv	bluetriangle	0	3	blue	triangle	28	3	bad	G2	bad	G	2
10	1189458_24_Jul_2018_15_52_30.csv	purplecircle	0	3	purple	circle	29	3	zed2	B1	zed	B	2
10	1189458_24_Jul_2018_15_52_30.csv	purplestar	0	3	purple	star	30	3	zed2	G1	zed	G	2
10	1189458_24_Jul_2018_15_52_30.csv	redcircle	0	3	red	circle	31	3	zed1	B1	zed	B	2
10	1189458_24_Jul_2018_15_52_30.csv	redstar	0	3	red	star	32	3	zed1	G1	zed	G	2
10	1189458_24_Jul_2018_15_52_30.csv	yellowcircle	0	3	yellow	circle	33	3	good	B1	good	B	2
10	1189458_24_Jul_2018_15_52_30.csv	yellowcross	0	3	yellow	cross	34	3	good	B2	good	B	2
10	1189458_24_Jul_2018_15_52_30.csv	yellowstar	3	3	yellow	star	35	3	good	G1	good	G	2
10	1189458_24_Jul_2018_15_52_30.csv	yellowtriangle	3	3	yellow	triangle	36	3	good	G2	good	G	2
10	266171_24_Jul_2018_18_31_40.csv	bluecircle	0	3	blue	circle	325	3	bad	B1	bad	B	3
10	266171_24_Jul_2018_18_31_40.csv	bluecross	0	3	blue	cross	326	3	bad	B2	bad	B	3
10	266171_24_Jul_2018_18_31_40.csv	bluestar	3	3	blue	star	327	3	bad	G1	bad	G	3
10	266171_24_Jul_2018_18_31_40.csv	bluetriangle	0	3	blue	triangle	328	3	bad	G2	bad	G	3
10	266171_24_Jul_2018_18_31_40.csv	purplecircle	0	3	purple	circle	329	3	zed2	B1	zed	B	3
10	266171_24_Jul_2018_18_31_40.csv	purplestar	3	3	purple	star	330	3	zed2	G1	zed	G	3
10	266171_24_Jul_2018_18_31_40.csv	redcircle	0	3	red	circle	331	3	zed1	B1	zed	B	3
10	266171_24_Jul_2018_18_31_40.csv	redstar	3	3	red	star	332	3	zed1	G1	zed	G	3
10	266171_24_Jul_2018_18_31_40.csv	yellowcircle	0	3	yellow	circle	333	3	good	B1	good	B	3
10	266171_24_Jul_2018_18_31_40.csv	yellowcross	0	3	yellow	cross	334	3	good	B2	good	B	3
10	266171_24_Jul_2018_18_31_40.csv	yellowstar	3	3	yellow	star	335	3	good	G1	good	G	3
10	266171_24_Jul_2018_18_31_40.csv	yellowtriangle	0	3	yellow	triangle	336	3	good	G2	good	G	3
10	2987451_19_Jul_2018_12_23_35.csv	bluecircle	0	3	blue	circle	385	3	bad	B1	bad	B	5
10	2987451_19_Jul_2018_12_23_35.csv	bluecross	1	3	blue	cross	386	3	bad	B2	bad	B	5
10	2987451_19_Jul_2018_12_23_35.csv	bluestar	3	3	blue	star	387	3	bad	G1	bad	G	5
10	2987451_19_Jul_2018_12_23_35.csv	bluetriangle	3	3	blue	triangle	388	3	bad	G2	bad	G	5
10	2987451_19_Jul_2018_12_23_35.csv	purplecircle	0	3	purple	circle	389	3	zed2	B1	zed	B	5
10	2987451_19_Jul_2018_12_23_35.csv	purplestar	3	3	purple	star	390	3	zed2	G1	zed	G	5
10	2987451_19_Jul_2018_12_23_35.csv	redcircle	0	3	red	circle	391	3	zed1	B1	zed	B	5
10	2987451_19_Jul_2018_12_23_35.csv	redstar	3	3	red	star	392	3	zed1	G1	zed	G	5
10	2987451_19_Jul_2018_12_23_35.csv	yellowcircle	0	3	yellow	circle	393	3	good	B1	good	B	5
10	2987451_19_Jul_2018_12_23_35.csv	yellowcross	2	3	yellow	cross	394	3	good	B2	good	B	5
10	2987451_19_Jul_2018_12_23_35.csv	yellowstar	3	3	yellow	star	395	3	good	G1	good	G	5
10	2987451_19_Jul_2018_12_23_35.csv	yellowtriangle	3	3	yellow	triangle	396	3	good	G2	good	G	5
10	3541439_19_Jul_2018_13_49_09.csv	bluecircle	3	3	blue	circle	613	3	bad	B1	bad	B	1
10	3541439_19_Jul_2018_13_49_09.csv	bluecross	3	3	blue	cross	614	3	bad	B2	bad	B	1
10	3541439_19_Jul_2018_13_49_09.csv	bluestar	3	3	blue	star	615	3	bad	G1	bad	G	1
10	3541439_19_Jul_2018_13_49_09.csv	bluetriangle	3	3	blue	triangle	616	3	bad	G2	bad	G	1
10	3541439_19_Jul_2018_13_49_09.csv	purplecircle	3	3	purple	circle	617	3	zed2	B1	zed	B	1
10	3541439_19_Jul_2018_13_49_09.csv	purplestar	3	3	purple	star	618	3	zed2	G1	zed	G	1
10	3541439_19_Jul_2018_13_49_09.csv	redcircle	3	3	red	circle	619	3	zed1	B1	zed	B	1
10	3541439_19_Jul_2018_13_49_09.csv	redstar	3	3	red	star	620	3	zed1	G1	zed	G	1
10	3541439_19_Jul_2018_13_49_09.csv	yellowcircle	3	3	yellow	circle	621	3	good	B1	good	B	1
10	3541439_19_Jul_2018_13_49_09.csv	yellowcross	3	3	yellow	cross	622	3	good	B2	good	B	1
10	3541439_19_Jul_2018_13_49_09.csv	yellowstar	3	3	yellow	star	623	3	good	G1	good	G	1
10	3541439_19_Jul_2018_13_49_09.csv	yellowtriangle	3	3	yellow	triangle	624	3	good	G2	good	G	1
10	4065830_24_Jul_2018_15_19_47.csv	bluecircle	3	3	blue	circle	733	3	bad	B1	bad	B	1
10	4065830_24_Jul_2018_15_19_47.csv	bluecross	0	3	blue	cross	734	3	bad	B2	bad	B	1
10	4065830_24_Jul_2018_15_19_47.csv	bluestar	3	3	blue	star	735	3	bad	G1	bad	G	1
10	4065830_24_Jul_2018_15_19_47.csv	bluetriangle	3	3	blue	triangle	736	3	bad	G2	bad	G	1
10	4065830_24_Jul_2018_15_19_47.csv	purplecircle	3	3	purple	circle	737	3	zed2	B1	zed	B	1
10	4065830_24_Jul_2018_15_19_47.csv	purplestar	3	3	purple	star	738	3	zed2	G1	zed	G	1
10	4065830_24_Jul_2018_15_19_47.csv	redcircle	3	3	red	circle	739	3	zed1	B1	zed	B	1
10	4065830_24_Jul_2018_15_19_47.csv	redstar	3	3	red	star	740	3	zed1	G1	zed	G	1
10	4065830_24_Jul_2018_15_19_47.csv	yellowcircle	3	3	yellow	circle	741	3	good	B1	good	B	1
10	4065830_24_Jul_2018_15_19_47.csv	yellowcross	0	3	yellow	cross	742	3	good	B2	good	B	1
10	4065830_24_Jul_2018_15_19_47.csv	yellowstar	3	3	yellow	star	743	3	good	G1	good	G	1
10	4065830_24_Jul_2018_15_19_47.csv	yellowtriangle	3	3	yellow	triangle	744	3	good	G2	good	G	1
10	5235166_19_Jul_2018_13_16_31.csv	bluecircle	3	3	blue	circle	1213	3	bad	B1	bad	B	3
10	5235166_19_Jul_2018_13_16_31.csv	bluecross	0	3	blue	cross	1214	3	bad	B2	bad	B	3
10	5235166_19_Jul_2018_13_16_31.csv	bluestar	0	3	blue	star	1215	3	bad	G1	bad	G	3
10	5235166_19_Jul_2018_13_16_31.csv	bluetriangle	0	3	blue	triangle	1216	3	bad	G2	bad	G	3
10	5235166_19_Jul_2018_13_16_31.csv	purplecircle	3	3	purple	circle	1217	3	zed2	B1	zed	B	3
10	5235166_19_Jul_2018_13_16_31.csv	purplestar	3	3	purple	star	1218	3	zed2	G1	zed	G	3
10	5235166_19_Jul_2018_13_16_31.csv	redcircle	3	3	red	circle	1219	3	zed1	B1	zed	B	3
10	5235166_19_Jul_2018_13_16_31.csv	redstar	3	3	red	star	1220	3	zed1	G1	zed	G	3
10	5235166_19_Jul_2018_13_16_31.csv	yellowcircle	3	3	yellow	circle	1221	3	good	B1	good	B	3
10	5235166_19_Jul_2018_13_16_31.csv	yellowcross	3	3	yellow	cross	1222	3	good	B2	good	B	3
10	5235166_19_Jul_2018_13_16_31.csv	yellowstar	3	3	yellow	star	1223	3	good	G1	good	G	3
10	5235166_19_Jul_2018_13_16_31.csv	yellowtriangle	3	3	yellow	triangle	1224	3	good	G2	good	G	3
10	6046641_24_Jul_2018_10_24_47.csv	bluecircle	0	3	blue	circle	1573	3	bad	B1	bad	B	3
10	6046641_24_Jul_2018_10_24_47.csv	bluecross	0	3	blue	cross	1574	3	bad	B2	bad	B	3
10	6046641_24_Jul_2018_10_24_47.csv	bluestar	3	3	blue	star	1575	3	bad	G1	bad	G	3
10	6046641_24_Jul_2018_10_24_47.csv	bluetriangle	0	3	blue	triangle	1576	3	bad	G2	bad	G	3
10	6046641_24_Jul_2018_10_24_47.csv	purplecircle	0	3	purple	circle	1577	3	zed2	B1	zed	B	3
10	6046641_24_Jul_2018_10_24_47.csv	purplestar	3	3	purple	star	1578	3	zed2	G1	zed	G	3
10	6046641_24_Jul_2018_10_24_47.csv	redcircle	0	3	red	circle	1579	3	zed1	B1	zed	B	3
10	6046641_24_Jul_2018_10_24_47.csv	redstar	3	3	red	star	1580	3	zed1	G1	zed	G	3
10	6046641_24_Jul_2018_10_24_47.csv	yellowcircle	0	3	yellow	circle	1581	3	good	B1	good	B	3
10	6046641_24_Jul_2018_10_24_47.csv	yellowcross	0	3	yellow	cross	1582	3	good	B2	good	B	3
10	6046641_24_Jul_2018_10_24_47.csv	yellowstar	3	3	yellow	star	1583	3	good	G1	good	G	3
10	6046641_24_Jul_2018_10_24_47.csv	yellowtriangle	0	3	yellow	triangle	1584	3	good	G2	good	G	3
10	6571929_24_Jul_2018_18_24_26.csv	bluecircle	0	3	blue	circle	1693	3	bad	B1	bad	B	5
10	6571929_24_Jul_2018_18_24_26.csv	bluecross	0	3	blue	cross	1694	3	bad	B2	bad	B	5
10	6571929_24_Jul_2018_18_24_26.csv	bluestar	3	3	blue	star	1695	3	bad	G1	bad	G	5
10	6571929_24_Jul_2018_18_24_26.csv	bluetriangle	0	3	blue	triangle	1696	3	bad	G2	bad	G	5
10	6571929_24_Jul_2018_18_24_26.csv	purplecircle	0	3	purple	circle	1697	3	zed2	B1	zed	B	5
10	6571929_24_Jul_2018_18_24_26.csv	purplestar	3	3	purple	star	1698	3	zed2	G1	zed	G	5
10	6571929_24_Jul_2018_18_24_26.csv	redcircle	0	3	red	circle	1699	3	zed1	B1	zed	B	5
10	6571929_24_Jul_2018_18_24_26.csv	redstar	3	3	red	star	1700	3	zed1	G1	zed	G	5
10	6571929_24_Jul_2018_18_24_26.csv	yellowcircle	0	3	yellow	circle	1701	3	good	B1	good	B	5
10	6571929_24_Jul_2018_18_24_26.csv	yellowcross	0	3	yellow	cross	1702	3	good	B2	good	B	5
10	6571929_24_Jul_2018_18_24_26.csv	yellowstar	3	3	yellow	star	1703	3	good	G1	good	G	5
10	6571929_24_Jul_2018_18_24_26.csv	yellowtriangle	0	3	yellow	triangle	1704	3	good	G2	good	G	5
10	7207597_31_Jul_2018_11_55_07.csv	bluecircle	0	3	blue	circle	1813	3	bad	B1	bad	B	2
10	7207597_31_Jul_2018_11_55_07.csv	bluecross	0	3	blue	cross	1814	3	bad	B2	bad	B	2
10	7207597_31_Jul_2018_11_55_07.csv	bluestar	3	3	blue	star	1815	3	bad	G1	bad	G	2
10	7207597_31_Jul_2018_11_55_07.csv	bluetriangle	0	3	blue	triangle	1816	3	bad	G2	bad	G	2
10	7207597_31_Jul_2018_11_55_07.csv	purplecircle	0	3	purple	circle	1817	3	zed2	B1	zed	B	2
10	7207597_31_Jul_2018_11_55_07.csv	purplestar	3	3	purple	star	1818	3	zed2	G1	zed	G	2
10	7207597_31_Jul_2018_11_55_07.csv	redcircle	0	3	red	circle	1819	3	zed1	B1	zed	B	2
10	7207597_31_Jul_2018_11_55_07.csv	redstar	0	3	red	star	1820	3	zed1	G1	zed	G	2
10	7207597_31_Jul_2018_11_55_07.csv	yellowcircle	0	3	yellow	circle	1821	3	good	B1	good	B	2
10	7207597_31_Jul_2018_11_55_07.csv	yellowcross	0	3	yellow	cross	1822	3	good	B2	good	B	2
10	7207597_31_Jul_2018_11_55_07.csv	yellowstar	3	3	yellow	star	1823	3	good	G1	good	G	2
10	7207597_31_Jul_2018_11_55_07.csv	yellowtriangle	3	3	yellow	triangle	1824	3	good	G2	good	G	2
10	7713374_31_Jul_2018_11_47_46.csv	bluecircle	0	3	blue	circle	2173	3	bad	B1	bad	B	2
10	7713374_31_Jul_2018_11_47_46.csv	bluecross	0	3	blue	cross	2174	3	bad	B2	bad	B	2
10	7713374_31_Jul_2018_11_47_46.csv	bluestar	0	3	blue	star	2175	3	bad	G1	bad	G	2
10	7713374_31_Jul_2018_11_47_46.csv	bluetriangle	0	3	blue	triangle	2176	3	bad	G2	bad	G	2
10	7713374_31_Jul_2018_11_47_46.csv	purplecircle	0	3	purple	circle	2177	3	zed2	B1	zed	B	2
10	7713374_31_Jul_2018_11_47_46.csv	purplestar	0	3	purple	star	2178	3	zed2	G1	zed	G	2
10	7713374_31_Jul_2018_11_47_46.csv	redcircle	3	3	red	circle	2179	3	zed1	B1	zed	B	2
10	7713374_31_Jul_2018_11_47_46.csv	redstar	3	3	red	star	2180	3	zed1	G1	zed	G	2
10	7713374_31_Jul_2018_11_47_46.csv	yellowcircle	2	3	yellow	circle	2181	3	good	B1	good	B	2
10	7713374_31_Jul_2018_11_47_46.csv	yellowcross	0	3	yellow	cross	2182	3	good	B2	good	B	2
10	7713374_31_Jul_2018_11_47_46.csv	yellowstar	3	3	yellow	star	2183	3	good	G1	good	G	2
10	7713374_31_Jul_2018_11_47_46.csv	yellowtriangle	3	3	yellow	triangle	2184	3	good	G2	good	G	2
11	2094719_26_Jul_2018_13_57_25.csv	bluecircle	3	3	blue	circle	265	3	good	G1	good	G	4
11	2094719_26_Jul_2018_13_57_25.csv	bluecross	3	3	blue	cross	266	3	zed2	G1	zed	G	4
11	2094719_26_Jul_2018_13_57_25.csv	bluestar	3	3	blue	star	267	3	bad	G1	bad	G	4
11	2094719_26_Jul_2018_13_57_25.csv	bluetriangle	3	3	blue	triangle	268	3	zed1	G1	zed	G	4
11	2094719_26_Jul_2018_13_57_25.csv	purplecircle	0	3	purple	circle	269	3	good	B2	good	B	4
11	2094719_26_Jul_2018_13_57_25.csv	purplestar	0	3	purple	star	270	3	bad	B2	bad	B	4
11	2094719_26_Jul_2018_13_57_25.csv	redcircle	3	3	red	circle	271	3	good	G2	good	G	4
11	2094719_26_Jul_2018_13_57_25.csv	redstar	3	3	red	star	272	3	bad	G2	bad	G	4
11	2094719_26_Jul_2018_13_57_25.csv	yellowcircle	0	3	yellow	circle	273	3	good	B1	good	B	4
11	2094719_26_Jul_2018_13_57_25.csv	yellowcross	0	3	yellow	cross	274	3	zed2	B1	zed	B	4
11	2094719_26_Jul_2018_13_57_25.csv	yellowstar	0	3	yellow	star	275	3	bad	B1	bad	B	4
11	2094719_26_Jul_2018_13_57_25.csv	yellowtriangle	0	3	yellow	triangle	276	3	zed1	B1	zed	B	4
11	4169792_23_Jul_2018_12_57_59.csv	bluecircle	0	3	blue	circle	793	3	good	G1	good	G	3
11	4169792_23_Jul_2018_12_57_59.csv	bluecross	0	3	blue	cross	794	3	zed2	G1	zed	G	3
11	4169792_23_Jul_2018_12_57_59.csv	bluestar	0	3	blue	star	795	3	bad	G1	bad	G	3
11	4169792_23_Jul_2018_12_57_59.csv	bluetriangle	0	3	blue	triangle	796	3	zed1	G1	zed	G	3
11	4169792_23_Jul_2018_12_57_59.csv	purplecircle	0	3	purple	circle	797	3	good	B2	good	B	3
11	4169792_23_Jul_2018_12_57_59.csv	purplestar	0	3	purple	star	798	3	bad	B2	bad	B	3
11	4169792_23_Jul_2018_12_57_59.csv	redcircle	0	3	red	circle	799	3	good	G2	good	G	3
11	4169792_23_Jul_2018_12_57_59.csv	redstar	0	3	red	star	800	3	bad	G2	bad	G	3
11	4169792_23_Jul_2018_12_57_59.csv	yellowcircle	3	3	yellow	circle	801	3	good	B1	good	B	3
11	4169792_23_Jul_2018_12_57_59.csv	yellowcross	3	3	yellow	cross	802	3	zed2	B1	zed	B	3
11	4169792_23_Jul_2018_12_57_59.csv	yellowstar	3	3	yellow	star	803	3	bad	B1	bad	B	3
11	4169792_23_Jul_2018_12_57_59.csv	yellowtriangle	3	3	yellow	triangle	804	3	zed1	B1	zed	B	3
11	5026349_24_Jul_2018_13_40_33.csv	bluecircle	3	3	blue	circle	1093	3	good	G1	good	G	5
11	5026349_24_Jul_2018_13_40_33.csv	bluecross	0	3	blue	cross	1094	3	zed2	G1	zed	G	5
11	5026349_24_Jul_2018_13_40_33.csv	bluestar	0	3	blue	star	1095	3	bad	G1	bad	G	5
11	5026349_24_Jul_2018_13_40_33.csv	bluetriangle	0	3	blue	triangle	1096	3	zed1	G1	zed	G	5
11	5026349_24_Jul_2018_13_40_33.csv	purplecircle	3	3	purple	circle	1097	3	good	B2	good	B	5
11	5026349_24_Jul_2018_13_40_33.csv	purplestar	0	3	purple	star	1098	3	bad	B2	bad	B	5
11	5026349_24_Jul_2018_13_40_33.csv	redcircle	3	3	red	circle	1099	3	good	G2	good	G	5
11	5026349_24_Jul_2018_13_40_33.csv	redstar	0	3	red	star	1100	3	bad	G2	bad	G	5
11	5026349_24_Jul_2018_13_40_33.csv	yellowcircle	3	3	yellow	circle	1101	3	good	B1	good	B	5
11	5026349_24_Jul_2018_13_40_33.csv	yellowcross	3	3	yellow	cross	1102	3	zed2	B1	zed	B	5
11	5026349_24_Jul_2018_13_40_33.csv	yellowstar	0	3	yellow	star	1103	3	bad	B1	bad	B	5
11	5026349_24_Jul_2018_13_40_33.csv	yellowtriangle	0	3	yellow	triangle	1104	3	zed1	B1	zed	B	5
11	5305787_02_Aug_2018_12_12_29.csv	bluecircle	3	3	blue	circle	1273	3	good	G1	good	G	3
11	5305787_02_Aug_2018_12_12_29.csv	bluecross	3	3	blue	cross	1274	3	zed2	G1	zed	G	3
11	5305787_02_Aug_2018_12_12_29.csv	bluestar	3	3	blue	star	1275	3	bad	G1	bad	G	3
11	5305787_02_Aug_2018_12_12_29.csv	bluetriangle	3	3	blue	triangle	1276	3	zed1	G1	zed	G	3
11	5305787_02_Aug_2018_12_12_29.csv	purplecircle	3	3	purple	circle	1277	3	good	B2	good	B	3
11	5305787_02_Aug_2018_12_12_29.csv	purplestar	3	3	purple	star	1278	3	bad	B2	bad	B	3
11	5305787_02_Aug_2018_12_12_29.csv	redcircle	3	3	red	circle	1279	3	good	G2	good	G	3
11	5305787_02_Aug_2018_12_12_29.csv	redstar	3	3	red	star	1280	3	bad	G2	bad	G	3
11	5305787_02_Aug_2018_12_12_29.csv	yellowcircle	0	3	yellow	circle	1281	3	good	B1	good	B	3
11	5305787_02_Aug_2018_12_12_29.csv	yellowcross	0	3	yellow	cross	1282	3	zed2	B1	zed	B	3
11	5305787_02_Aug_2018_12_12_29.csv	yellowstar	0	3	yellow	star	1283	3	bad	B1	bad	B	3
11	5305787_02_Aug_2018_12_12_29.csv	yellowtriangle	0	3	yellow	triangle	1284	3	zed1	B1	zed	B	3
11	6002854_26_Jul_2018_11_22_36.csv	bluecircle	3	3	blue	circle	1513	3	good	G1	good	G	3
11	6002854_26_Jul_2018_11_22_36.csv	bluecross	0	3	blue	cross	1514	3	zed2	G1	zed	G	3
11	6002854_26_Jul_2018_11_22_36.csv	bluestar	0	3	blue	star	1515	3	bad	G1	bad	G	3
11	6002854_26_Jul_2018_11_22_36.csv	bluetriangle	0	3	blue	triangle	1516	3	zed1	G1	zed	G	3
11	6002854_26_Jul_2018_11_22_36.csv	purplecircle	3	3	purple	circle	1517	3	good	B2	good	B	3
11	6002854_26_Jul_2018_11_22_36.csv	purplestar	0	3	purple	star	1518	3	bad	B2	bad	B	3
11	6002854_26_Jul_2018_11_22_36.csv	redcircle	0	3	red	circle	1519	3	good	G2	good	G	3
11	6002854_26_Jul_2018_11_22_36.csv	redstar	0	3	red	star	1520	3	bad	G2	bad	G	3
11	6002854_26_Jul_2018_11_22_36.csv	yellowcircle	3	3	yellow	circle	1521	3	good	B1	good	B	3
11	6002854_26_Jul_2018_11_22_36.csv	yellowcross	0	3	yellow	cross	1522	3	zed2	B1	zed	B	3
11	6002854_26_Jul_2018_11_22_36.csv	yellowstar	0	3	yellow	star	1523	3	bad	B1	bad	B	3
11	6002854_26_Jul_2018_11_22_36.csv	yellowtriangle	0	3	yellow	triangle	1524	3	zed1	B1	zed	B	3
11	7343055_01_Aug_2018_12_57_11.csv	bluecircle	3	3	blue	circle	1873	3	good	G1	good	G	5
11	7343055_01_Aug_2018_12_57_11.csv	bluecross	3	3	blue	cross	1874	3	zed2	G1	zed	G	5
11	7343055_01_Aug_2018_12_57_11.csv	bluestar	3	3	blue	star	1875	3	bad	G1	bad	G	5
11	7343055_01_Aug_2018_12_57_11.csv	bluetriangle	3	3	blue	triangle	1876	3	zed1	G1	zed	G	5
11	7343055_01_Aug_2018_12_57_11.csv	purplecircle	0	3	purple	circle	1877	3	good	B2	good	B	5
11	7343055_01_Aug_2018_12_57_11.csv	purplestar	0	3	purple	star	1878	3	bad	B2	bad	B	5
11	7343055_01_Aug_2018_12_57_11.csv	redcircle	3	3	red	circle	1879	3	good	G2	good	G	5
11	7343055_01_Aug_2018_12_57_11.csv	redstar	3	3	red	star	1880	3	bad	G2	bad	G	5
11	7343055_01_Aug_2018_12_57_11.csv	yellowcircle	0	3	yellow	circle	1881	3	good	B1	good	B	5
11	7343055_01_Aug_2018_12_57_11.csv	yellowcross	0	3	yellow	cross	1882	3	zed2	B1	zed	B	5
11	7343055_01_Aug_2018_12_57_11.csv	yellowstar	0	3	yellow	star	1883	3	bad	B1	bad	B	5
11	7343055_01_Aug_2018_12_57_11.csv	yellowtriangle	0	3	yellow	triangle	1884	3	zed1	B1	zed	B	5
11	7570864_01_Aug_2018_11_31_15.csv	bluecircle	3	3	blue	circle	1993	3	good	G1	good	G	5
11	7570864_01_Aug_2018_11_31_15.csv	bluecross	3	3	blue	cross	1994	3	zed2	G1	zed	G	5
11	7570864_01_Aug_2018_11_31_15.csv	bluestar	3	3	blue	star	1995	3	bad	G1	bad	G	5
11	7570864_01_Aug_2018_11_31_15.csv	bluetriangle	3	3	blue	triangle	1996	3	zed1	G1	zed	G	5
11	7570864_01_Aug_2018_11_31_15.csv	purplecircle	0	3	purple	circle	1997	3	good	B2	good	B	5
11	7570864_01_Aug_2018_11_31_15.csv	purplestar	0	3	purple	star	1998	3	bad	B2	bad	B	5
11	7570864_01_Aug_2018_11_31_15.csv	redcircle	3	3	red	circle	1999	3	good	G2	good	G	5
11	7570864_01_Aug_2018_11_31_15.csv	redstar	3	3	red	star	2000	3	bad	G2	bad	G	5
11	7570864_01_Aug_2018_11_31_15.csv	yellowcircle	0	3	yellow	circle	2001	3	good	B1	good	B	5
11	7570864_01_Aug_2018_11_31_15.csv	yellowcross	0	3	yellow	cross	2002	3	zed2	B1	zed	B	5
11	7570864_01_Aug_2018_11_31_15.csv	yellowstar	0	3	yellow	star	2003	3	bad	B1	bad	B	5
11	7570864_01_Aug_2018_11_31_15.csv	yellowtriangle	0	3	yellow	triangle	2004	3	zed1	B1	zed	B	5
11	8983212_01_Aug_2018_14_27_48.csv	bluecircle	0	3	blue	circle	2377	3	good	G1	good	G	4
11	8983212_01_Aug_2018_14_27_48.csv	bluecross	2	3	blue	cross	2378	3	zed2	G1	zed	G	4
11	8983212_01_Aug_2018_14_27_48.csv	bluestar	0	3	blue	star	2379	3	bad	G1	bad	G	4
11	8983212_01_Aug_2018_14_27_48.csv	bluetriangle	1	3	blue	triangle	2380	3	zed1	G1	zed	G	4
11	8983212_01_Aug_2018_14_27_48.csv	purplecircle	1	3	purple	circle	2381	3	good	B2	good	B	4
11	8983212_01_Aug_2018_14_27_48.csv	purplestar	2	3	purple	star	2382	3	bad	B2	bad	B	4
11	8983212_01_Aug_2018_14_27_48.csv	redcircle	0	3	red	circle	2383	3	good	G2	good	G	4
11	8983212_01_Aug_2018_14_27_48.csv	redstar	2	3	red	star	2384	3	bad	G2	bad	G	4
11	8983212_01_Aug_2018_14_27_48.csv	yellowcircle	2	3	yellow	circle	2385	3	good	B1	good	B	4
11	8983212_01_Aug_2018_14_27_48.csv	yellowcross	1	3	yellow	cross	2386	3	zed2	B1	zed	B	4
11	8983212_01_Aug_2018_14_27_48.csv	yellowstar	0	3	yellow	star	2387	3	bad	B1	bad	B	4
11	8983212_01_Aug_2018_14_27_48.csv	yellowtriangle	1	3	yellow	triangle	2388	3	zed1	B1	zed	B	4
11	9256005_31_Jul_2018_12_10_34.csv	bluecircle	1	3	blue	circle	2497	3	good	G1	good	G	1
11	9256005_31_Jul_2018_12_10_34.csv	bluecross	0	3	blue	cross	2498	3	zed2	G1	zed	G	1
11	9256005_31_Jul_2018_12_10_34.csv	bluestar	0	3	blue	star	2499	3	bad	G1	bad	G	1
11	9256005_31_Jul_2018_12_10_34.csv	bluetriangle	0	3	blue	triangle	2500	3	zed1	G1	zed	G	1
11	9256005_31_Jul_2018_12_10_34.csv	purplecircle	0	3	purple	circle	2501	3	good	B2	good	B	1
11	9256005_31_Jul_2018_12_10_34.csv	purplestar	0	3	purple	star	2502	3	bad	B2	bad	B	1
11	9256005_31_Jul_2018_12_10_34.csv	redcircle	0	3	red	circle	2503	3	good	G2	good	G	1
11	9256005_31_Jul_2018_12_10_34.csv	redstar	0	3	red	star	2504	3	bad	G2	bad	G	1
11	9256005_31_Jul_2018_12_10_34.csv	yellowcircle	0	3	yellow	circle	2505	3	good	B1	good	B	1
11	9256005_31_Jul_2018_12_10_34.csv	yellowcross	0	3	yellow	cross	2506	3	zed2	B1	zed	B	1
11	9256005_31_Jul_2018_12_10_34.csv	yellowstar	0	3	yellow	star	2507	3	bad	B1	bad	B	1
11	9256005_31_Jul_2018_12_10_34.csv	yellowtriangle	0	3	yellow	triangle	2508	3	zed1	B1	zed	B	1
11	936681_23_Jul_2018_13_23_59.csv	bluecircle	3	3	blue	circle	2557	3	good	G1	good	G	1
11	936681_23_Jul_2018_13_23_59.csv	bluecross	3	3	blue	cross	2558	3	zed2	G1	zed	G	1
11	936681_23_Jul_2018_13_23_59.csv	bluestar	3	3	blue	star	2559	3	bad	G1	bad	G	1
11	936681_23_Jul_2018_13_23_59.csv	bluetriangle	0	3	blue	triangle	2560	3	zed1	G1	zed	G	1
11	936681_23_Jul_2018_13_23_59.csv	purplecircle	0	3	purple	circle	2561	3	good	B2	good	B	1
11	936681_23_Jul_2018_13_23_59.csv	purplestar	3	3	purple	star	2562	3	bad	B2	bad	B	1
11	936681_23_Jul_2018_13_23_59.csv	redcircle	0	3	red	circle	2563	3	good	G2	good	G	1
11	936681_23_Jul_2018_13_23_59.csv	redstar	0	3	red	star	2564	3	bad	G2	bad	G	1
11	936681_23_Jul_2018_13_23_59.csv	yellowcircle	0	3	yellow	circle	2565	3	good	B1	good	B	1
11	936681_23_Jul_2018_13_23_59.csv	yellowcross	0	3	yellow	cross	2566	3	zed2	B1	zed	B	1
11	936681_23_Jul_2018_13_23_59.csv	yellowstar	0	3	yellow	star	2567	3	bad	B1	bad	B	1
11	936681_23_Jul_2018_13_23_59.csv	yellowtriangle	0	3	yellow	triangle	2568	3	zed1	B1	zed	B	1
12	1548495_02_Aug_2018_11_26_27.csv	bluecircle	0	3	blue	circle	145	3	zed2	B1	zed	B	4
12	1548495_02_Aug_2018_11_26_27.csv	bluecross	0	3	blue	cross	146	3	bad	B1	bad	B	4
12	1548495_02_Aug_2018_11_26_27.csv	bluestar	0	3	blue	star	147	3	good	B1	good	B	4
12	1548495_02_Aug_2018_11_26_27.csv	bluetriangle	0	3	blue	triangle	148	3	zed1	B1	zed	B	4
12	1548495_02_Aug_2018_11_26_27.csv	purplecircle	0	3	purple	circle	149	3	bad	G2	bad	G	4
12	1548495_02_Aug_2018_11_26_27.csv	purplestar	3	3	purple	star	150	3	good	G2	good	G	4
12	1548495_02_Aug_2018_11_26_27.csv	redcircle	0	3	red	circle	151	3	bad	B2	bad	B	4
12	1548495_02_Aug_2018_11_26_27.csv	redstar	0	3	red	star	152	3	good	B2	good	B	4
12	1548495_02_Aug_2018_11_26_27.csv	yellowcircle	3	3	yellow	circle	153	3	zed2	G1	zed	G	4
12	1548495_02_Aug_2018_11_26_27.csv	yellowcross	3	3	yellow	cross	154	3	bad	G1	bad	G	4
12	1548495_02_Aug_2018_11_26_27.csv	yellowstar	3	3	yellow	star	155	3	good	G1	good	G	4
12	1548495_02_Aug_2018_11_26_27.csv	yellowtriangle	3	3	yellow	triangle	156	3	zed1	G1	zed	G	4
12	1712470_24_Jul_2018_18_37_45.csv	bluecircle	0	3	blue	circle	205	3	zed2	B1	zed	B	2
12	1712470_24_Jul_2018_18_37_45.csv	bluecross	0	3	blue	cross	206	3	bad	B1	bad	B	2
12	1712470_24_Jul_2018_18_37_45.csv	bluestar	0	3	blue	star	207	3	good	B1	good	B	2
12	1712470_24_Jul_2018_18_37_45.csv	bluetriangle	0	3	blue	triangle	208	3	zed1	B1	zed	B	2
12	1712470_24_Jul_2018_18_37_45.csv	purplecircle	3	3	purple	circle	209	3	bad	G2	bad	G	2
12	1712470_24_Jul_2018_18_37_45.csv	purplestar	3	3	purple	star	210	3	good	G2	good	G	2
12	1712470_24_Jul_2018_18_37_45.csv	redcircle	0	3	red	circle	211	3	bad	B2	bad	B	2
12	1712470_24_Jul_2018_18_37_45.csv	redstar	0	3	red	star	212	3	good	B2	good	B	2
12	1712470_24_Jul_2018_18_37_45.csv	yellowcircle	0	3	yellow	circle	213	3	zed2	G1	zed	G	2
12	1712470_24_Jul_2018_18_37_45.csv	yellowcross	0	3	yellow	cross	214	3	bad	G1	bad	G	2
12	1712470_24_Jul_2018_18_37_45.csv	yellowstar	0	3	yellow	star	215	3	good	G1	good	G	2
12	1712470_24_Jul_2018_18_37_45.csv	yellowtriangle	0	3	yellow	triangle	216	3	zed1	G1	zed	G	2
12	4330361_24_Jul_2018_14_48_27.csv	bluecircle	2	3	blue	circle	853	3	zed2	B1	zed	B	1
12	4330361_24_Jul_2018_14_48_27.csv	bluecross	3	3	blue	cross	854	3	bad	B1	bad	B	1
12	4330361_24_Jul_2018_14_48_27.csv	bluestar	3	3	blue	star	855	3	good	B1	good	B	1
12	4330361_24_Jul_2018_14_48_27.csv	bluetriangle	1	3	blue	triangle	856	3	zed1	B1	zed	B	1
12	4330361_24_Jul_2018_14_48_27.csv	purplecircle	1	3	purple	circle	857	3	bad	G2	bad	G	1
12	4330361_24_Jul_2018_14_48_27.csv	purplestar	2	3	purple	star	858	3	good	G2	good	G	1
12	4330361_24_Jul_2018_14_48_27.csv	redcircle	2	3	red	circle	859	3	bad	B2	bad	B	1
12	4330361_24_Jul_2018_14_48_27.csv	redstar	1	3	red	star	860	3	good	B2	good	B	1
12	4330361_24_Jul_2018_14_48_27.csv	yellowcircle	3	3	yellow	circle	861	3	zed2	G1	zed	G	1
12	4330361_24_Jul_2018_14_48_27.csv	yellowcross	2	3	yellow	cross	862	3	bad	G1	bad	G	1
12	4330361_24_Jul_2018_14_48_27.csv	yellowstar	2	3	yellow	star	863	3	good	G1	good	G	1
12	4330361_24_Jul_2018_14_48_27.csv	yellowtriangle	0	3	yellow	triangle	864	3	zed1	G1	zed	G	1
12	4539653_19_Jul_2018_11_46_30.csv	bluecircle	0	3	blue	circle	973	3	zed2	B1	zed	B	1
12	4539653_19_Jul_2018_11_46_30.csv	bluecross	0	3	blue	cross	974	3	bad	B1	bad	B	1
12	4539653_19_Jul_2018_11_46_30.csv	bluestar	0	3	blue	star	975	3	good	B1	good	B	1
12	4539653_19_Jul_2018_11_46_30.csv	bluetriangle	0	3	blue	triangle	976	3	zed1	B1	zed	B	1
12	4539653_19_Jul_2018_11_46_30.csv	purplecircle	3	3	purple	circle	977	3	bad	G2	bad	G	1
12	4539653_19_Jul_2018_11_46_30.csv	purplestar	3	3	purple	star	978	3	good	G2	good	G	1
12	4539653_19_Jul_2018_11_46_30.csv	redcircle	0	3	red	circle	979	3	bad	B2	bad	B	1
12	4539653_19_Jul_2018_11_46_30.csv	redstar	0	3	red	star	980	3	good	B2	good	B	1
12	4539653_19_Jul_2018_11_46_30.csv	yellowcircle	3	3	yellow	circle	981	3	zed2	G1	zed	G	1
12	4539653_19_Jul_2018_11_46_30.csv	yellowcross	0	3	yellow	cross	982	3	bad	G1	bad	G	1
12	4539653_19_Jul_2018_11_46_30.csv	yellowstar	3	3	yellow	star	983	3	good	G1	good	G	1
12	4539653_19_Jul_2018_11_46_30.csv	yellowtriangle	2	3	yellow	triangle	984	3	zed1	G1	zed	G	1
12	5330634_23_Jul_2018_14_06_01.csv	bluecircle	0	3	blue	circle	1333	3	zed2	B1	zed	B	2
12	5330634_23_Jul_2018_14_06_01.csv	bluecross	0	3	blue	cross	1334	3	bad	B1	bad	B	2
12	5330634_23_Jul_2018_14_06_01.csv	bluestar	0	3	blue	star	1335	3	good	B1	good	B	2
12	5330634_23_Jul_2018_14_06_01.csv	bluetriangle	0	3	blue	triangle	1336	3	zed1	B1	zed	B	2
12	5330634_23_Jul_2018_14_06_01.csv	purplecircle	3	3	purple	circle	1337	3	bad	G2	bad	G	2
12	5330634_23_Jul_2018_14_06_01.csv	purplestar	3	3	purple	star	1338	3	good	G2	good	G	2
12	5330634_23_Jul_2018_14_06_01.csv	redcircle	0	3	red	circle	1339	3	bad	B2	bad	B	2
12	5330634_23_Jul_2018_14_06_01.csv	redstar	0	3	red	star	1340	3	good	B2	good	B	2
12	5330634_23_Jul_2018_14_06_01.csv	yellowcircle	3	3	yellow	circle	1341	3	zed2	G1	zed	G	2
12	5330634_23_Jul_2018_14_06_01.csv	yellowcross	3	3	yellow	cross	1342	3	bad	G1	bad	G	2
12	5330634_23_Jul_2018_14_06_01.csv	yellowstar	3	3	yellow	star	1343	3	good	G1	good	G	2
12	5330634_23_Jul_2018_14_06_01.csv	yellowtriangle	3	3	yellow	triangle	1344	3	zed1	G1	zed	G	2
12	6001869_19_Jul_2018_13_24_44.csv	bluecircle	0	3	blue	circle	1453	3	zed2	B1	zed	B	2
12	6001869_19_Jul_2018_13_24_44.csv	bluecross	0	3	blue	cross	1454	3	bad	B1	bad	B	2
12	6001869_19_Jul_2018_13_24_44.csv	bluestar	2	3	blue	star	1455	3	good	B1	good	B	2
12	6001869_19_Jul_2018_13_24_44.csv	bluetriangle	0	3	blue	triangle	1456	3	zed1	B1	zed	B	2
12	6001869_19_Jul_2018_13_24_44.csv	purplecircle	0	3	purple	circle	1457	3	bad	G2	bad	G	2
12	6001869_19_Jul_2018_13_24_44.csv	purplestar	2	3	purple	star	1458	3	good	G2	good	G	2
12	6001869_19_Jul_2018_13_24_44.csv	redcircle	2	3	red	circle	1459	3	bad	B2	bad	B	2
12	6001869_19_Jul_2018_13_24_44.csv	redstar	3	3	red	star	1460	3	good	B2	good	B	2
12	6001869_19_Jul_2018_13_24_44.csv	yellowcircle	0	3	yellow	circle	1461	3	zed2	G1	zed	G	2
12	6001869_19_Jul_2018_13_24_44.csv	yellowcross	1	3	yellow	cross	1462	3	bad	G1	bad	G	2
12	6001869_19_Jul_2018_13_24_44.csv	yellowstar	2	3	yellow	star	1463	3	good	G1	good	G	2
12	6001869_19_Jul_2018_13_24_44.csv	yellowtriangle	1	3	yellow	triangle	1464	3	zed1	G1	zed	G	2
12	6276180_01_Aug_2018_13_35_31.csv	bluecircle	1	3	blue	circle	1633	3	zed2	B1	zed	B	5
12	6276180_01_Aug_2018_13_35_31.csv	bluecross	3	3	blue	cross	1634	3	bad	B1	bad	B	5
12	6276180_01_Aug_2018_13_35_31.csv	bluestar	1	3	blue	star	1635	3	good	B1	good	B	5
12	6276180_01_Aug_2018_13_35_31.csv	bluetriangle	1	3	blue	triangle	1636	3	zed1	B1	zed	B	5
12	6276180_01_Aug_2018_13_35_31.csv	purplecircle	2	3	purple	circle	1637	3	bad	G2	bad	G	5
12	6276180_01_Aug_2018_13_35_31.csv	purplestar	2	3	purple	star	1638	3	good	G2	good	G	5
12	6276180_01_Aug_2018_13_35_31.csv	redcircle	3	3	red	circle	1639	3	bad	B2	bad	B	5
12	6276180_01_Aug_2018_13_35_31.csv	redstar	2	3	red	star	1640	3	good	B2	good	B	5
12	6276180_01_Aug_2018_13_35_31.csv	yellowcircle	3	3	yellow	circle	1641	3	zed2	G1	zed	G	5
12	6276180_01_Aug_2018_13_35_31.csv	yellowcross	1	3	yellow	cross	1642	3	bad	G1	bad	G	5
12	6276180_01_Aug_2018_13_35_31.csv	yellowstar	2	3	yellow	star	1643	3	good	G1	good	G	5
12	6276180_01_Aug_2018_13_35_31.csv	yellowtriangle	1	3	yellow	triangle	1644	3	zed1	G1	zed	G	5
12	662891_02_Aug_2018_14_48_13.csv	bluecircle	0	3	blue	circle	1753	3	zed2	B1	zed	B	3
12	662891_02_Aug_2018_14_48_13.csv	bluecross	0	3	blue	cross	1754	3	bad	B1	bad	B	3
12	662891_02_Aug_2018_14_48_13.csv	bluestar	0	3	blue	star	1755	3	good	B1	good	B	3
12	662891_02_Aug_2018_14_48_13.csv	bluetriangle	0	3	blue	triangle	1756	3	zed1	B1	zed	B	3
12	662891_02_Aug_2018_14_48_13.csv	purplecircle	0	3	purple	circle	1757	3	bad	G2	bad	G	3
12	662891_02_Aug_2018_14_48_13.csv	purplestar	0	3	purple	star	1758	3	good	G2	good	G	3
12	662891_02_Aug_2018_14_48_13.csv	redcircle	0	3	red	circle	1759	3	bad	B2	bad	B	3
12	662891_02_Aug_2018_14_48_13.csv	redstar	0	3	red	star	1760	3	good	B2	good	B	3
12	662891_02_Aug_2018_14_48_13.csv	yellowcircle	3	3	yellow	circle	1761	3	zed2	G1	zed	G	3
12	662891_02_Aug_2018_14_48_13.csv	yellowcross	3	3	yellow	cross	1762	3	bad	G1	bad	G	3
12	662891_02_Aug_2018_14_48_13.csv	yellowstar	3	3	yellow	star	1763	3	good	G1	good	G	3
12	662891_02_Aug_2018_14_48_13.csv	yellowtriangle	3	3	yellow	triangle	1764	3	zed1	G1	zed	G	3
12	7574009_31_Jul_2018_15_52_50.csv	bluecircle	0	3	blue	circle	2053	3	zed2	B1	zed	B	4
12	7574009_31_Jul_2018_15_52_50.csv	bluecross	0	3	blue	cross	2054	3	bad	B1	bad	B	4
12	7574009_31_Jul_2018_15_52_50.csv	bluestar	3	3	blue	star	2055	3	good	B1	good	B	4
12	7574009_31_Jul_2018_15_52_50.csv	bluetriangle	0	3	blue	triangle	2056	3	zed1	B1	zed	B	4
12	7574009_31_Jul_2018_15_52_50.csv	purplecircle	0	3	purple	circle	2057	3	bad	G2	bad	G	4
12	7574009_31_Jul_2018_15_52_50.csv	purplestar	3	3	purple	star	2058	3	good	G2	good	G	4
12	7574009_31_Jul_2018_15_52_50.csv	redcircle	0	3	red	circle	2059	3	bad	B2	bad	B	4
12	7574009_31_Jul_2018_15_52_50.csv	redstar	0	3	red	star	2060	3	good	B2	good	B	4
12	7574009_31_Jul_2018_15_52_50.csv	yellowcircle	0	3	yellow	circle	2061	3	zed2	G1	zed	G	4
12	7574009_31_Jul_2018_15_52_50.csv	yellowcross	0	3	yellow	cross	2062	3	bad	G1	bad	G	4
12	7574009_31_Jul_2018_15_52_50.csv	yellowstar	0	3	yellow	star	2063	3	good	G1	good	G	4
12	7574009_31_Jul_2018_15_52_50.csv	yellowtriangle	0	3	yellow	triangle	2064	3	zed1	G1	zed	G	4
12	7665085_24_Jul_2018_12_50_53.csv	bluecircle	3	3	blue	circle	2113	3	zed2	B1	zed	B	2
12	7665085_24_Jul_2018_12_50_53.csv	bluecross	0	3	blue	cross	2114	3	bad	B1	bad	B	2
12	7665085_24_Jul_2018_12_50_53.csv	bluestar	0	3	blue	star	2115	3	good	B1	good	B	2
12	7665085_24_Jul_2018_12_50_53.csv	bluetriangle	3	3	blue	triangle	2116	3	zed1	B1	zed	B	2
12	7665085_24_Jul_2018_12_50_53.csv	purplecircle	3	3	purple	circle	2117	3	bad	G2	bad	G	2
12	7665085_24_Jul_2018_12_50_53.csv	purplestar	3	3	purple	star	2118	3	good	G2	good	G	2
12	7665085_24_Jul_2018_12_50_53.csv	redcircle	3	3	red	circle	2119	3	bad	B2	bad	B	2
12	7665085_24_Jul_2018_12_50_53.csv	redstar	0	3	red	star	2120	3	good	B2	good	B	2
12	7665085_24_Jul_2018_12_50_53.csv	yellowcircle	3	3	yellow	circle	2121	3	zed2	G1	zed	G	2
12	7665085_24_Jul_2018_12_50_53.csv	yellowcross	3	3	yellow	cross	2122	3	bad	G1	bad	G	2
12	7665085_24_Jul_2018_12_50_53.csv	yellowstar	3	3	yellow	star	2123	3	good	G1	good	G	2
12	7665085_24_Jul_2018_12_50_53.csv	yellowtriangle	3	3	yellow	triangle	2124	3	zed1	G1	zed	G	2
12	9016068_24_Jul_2018_13_16_18.csv	bluecircle	0	3	blue	circle	2437	3	zed2	B1	zed	B	3
12	9016068_24_Jul_2018_13_16_18.csv	bluecross	0	3	blue	cross	2438	3	bad	B1	bad	B	3
12	9016068_24_Jul_2018_13_16_18.csv	bluestar	3	3	blue	star	2439	3	good	B1	good	B	3
12	9016068_24_Jul_2018_13_16_18.csv	bluetriangle	0	3	blue	triangle	2440	3	zed1	B1	zed	B	3
12	9016068_24_Jul_2018_13_16_18.csv	purplecircle	0	3	purple	circle	2441	3	bad	G2	bad	G	3
12	9016068_24_Jul_2018_13_16_18.csv	purplestar	3	3	purple	star	2442	3	good	G2	good	G	3
12	9016068_24_Jul_2018_13_16_18.csv	redcircle	0	3	red	circle	2443	3	bad	B2	bad	B	3
12	9016068_24_Jul_2018_13_16_18.csv	redstar	3	3	red	star	2444	3	good	B2	good	B	3
12	9016068_24_Jul_2018_13_16_18.csv	yellowcircle	0	3	yellow	circle	2445	3	zed2	G1	zed	G	3
12	9016068_24_Jul_2018_13_16_18.csv	yellowcross	0	3	yellow	cross	2446	3	bad	G1	bad	G	3
12	9016068_24_Jul_2018_13_16_18.csv	yellowstar	3	3	yellow	star	2447	3	good	G1	good	G	3
12	9016068_24_Jul_2018_13_16_18.csv	yellowtriangle	0	3	yellow	triangle	2448	3	zed1	G1	zed	G	3
13	1189458_24_Jul_2018_15_52_30.csv	bluecircle	3	3	blue	circle	37	4	good	G1	good	G	5
13	1189458_24_Jul_2018_15_52_30.csv	bluecross	0	3	blue	cross	38	4	good	G2	good	G	5
13	1189458_24_Jul_2018_15_52_30.csv	bluestar	0	3	blue	star	39	4	good	B1	good	B	5
13	1189458_24_Jul_2018_15_52_30.csv	bluetriangle	0	3	blue	triangle	40	4	good	B2	good	B	5
13	1189458_24_Jul_2018_15_52_30.csv	purplecircle	3	3	purple	circle	41	4	zed1	G1	zed	G	5
13	1189458_24_Jul_2018_15_52_30.csv	purplestar	0	3	purple	star	42	4	zed1	B1	zed	B	5
13	1189458_24_Jul_2018_15_52_30.csv	redcircle	3	3	red	circle	43	4	zed2	G1	zed	G	5
13	1189458_24_Jul_2018_15_52_30.csv	redstar	0	3	red	star	44	4	zed2	B1	zed	B	5
13	1189458_24_Jul_2018_15_52_30.csv	yellowcircle	3	3	yellow	circle	45	4	bad	G1	bad	G	5
13	1189458_24_Jul_2018_15_52_30.csv	yellowcross	0	3	yellow	cross	46	4	bad	G2	bad	G	5
13	1189458_24_Jul_2018_15_52_30.csv	yellowstar	0	3	yellow	star	47	4	bad	B1	bad	B	5
13	1189458_24_Jul_2018_15_52_30.csv	yellowtriangle	0	3	yellow	triangle	48	4	bad	B2	bad	B	5
13	2987451_19_Jul_2018_12_23_35.csv	bluecircle	3	3	blue	circle	397	4	good	G1	good	G	1
13	2987451_19_Jul_2018_12_23_35.csv	bluecross	0	3	blue	cross	398	4	good	G2	good	G	1
13	2987451_19_Jul_2018_12_23_35.csv	bluestar	0	3	blue	star	399	4	good	B1	good	B	1
13	2987451_19_Jul_2018_12_23_35.csv	bluetriangle	0	3	blue	triangle	400	4	good	B2	good	B	1
13	2987451_19_Jul_2018_12_23_35.csv	purplecircle	3	3	purple	circle	401	4	zed1	G1	zed	G	1
13	2987451_19_Jul_2018_12_23_35.csv	purplestar	0	3	purple	star	402	4	zed1	B1	zed	B	1
13	2987451_19_Jul_2018_12_23_35.csv	redcircle	3	3	red	circle	403	4	zed2	G1	zed	G	1
13	2987451_19_Jul_2018_12_23_35.csv	redstar	0	3	red	star	404	4	zed2	B1	zed	B	1
13	2987451_19_Jul_2018_12_23_35.csv	yellowcircle	1	3	yellow	circle	405	4	bad	G1	bad	G	1
13	2987451_19_Jul_2018_12_23_35.csv	yellowcross	0	3	yellow	cross	406	4	bad	G2	bad	G	1
13	2987451_19_Jul_2018_12_23_35.csv	yellowstar	0	3	yellow	star	407	4	bad	B1	bad	B	1
13	2987451_19_Jul_2018_12_23_35.csv	yellowtriangle	0	3	yellow	triangle	408	4	bad	B2	bad	B	1
13	4169792_23_Jul_2018_12_57_59.csv	bluecircle	3	3	blue	circle	805	4	good	G1	good	G	1
13	4169792_23_Jul_2018_12_57_59.csv	bluecross	1	3	blue	cross	806	4	good	G2	good	G	1
13	4169792_23_Jul_2018_12_57_59.csv	bluestar	0	3	blue	star	807	4	good	B1	good	B	1
13	4169792_23_Jul_2018_12_57_59.csv	bluetriangle	2	3	blue	triangle	808	4	good	B2	good	B	1
13	4169792_23_Jul_2018_12_57_59.csv	purplecircle	3	3	purple	circle	809	4	zed1	G1	zed	G	1
13	4169792_23_Jul_2018_12_57_59.csv	purplestar	0	3	purple	star	810	4	zed1	B1	zed	B	1
13	4169792_23_Jul_2018_12_57_59.csv	redcircle	3	3	red	circle	811	4	zed2	G1	zed	G	1
13	4169792_23_Jul_2018_12_57_59.csv	redstar	0	3	red	star	812	4	zed2	B1	zed	B	1
13	4169792_23_Jul_2018_12_57_59.csv	yellowcircle	3	3	yellow	circle	813	4	bad	G1	bad	G	1
13	4169792_23_Jul_2018_12_57_59.csv	yellowcross	0	3	yellow	cross	814	4	bad	G2	bad	G	1
13	4169792_23_Jul_2018_12_57_59.csv	yellowstar	0	3	yellow	star	815	4	bad	B1	bad	B	1
13	4169792_23_Jul_2018_12_57_59.csv	yellowtriangle	2	3	yellow	triangle	816	4	bad	B2	bad	B	1
13	4330361_24_Jul_2018_14_48_27.csv	bluecircle	3	3	blue	circle	865	4	good	G1	good	G	4
13	4330361_24_Jul_2018_14_48_27.csv	bluecross	0	3	blue	cross	866	4	good	G2	good	G	4
13	4330361_24_Jul_2018_14_48_27.csv	bluestar	0	3	blue	star	867	4	good	B1	good	B	4
13	4330361_24_Jul_2018_14_48_27.csv	bluetriangle	0	3	blue	triangle	868	4	good	B2	good	B	4
13	4330361_24_Jul_2018_14_48_27.csv	purplecircle	3	3	purple	circle	869	4	zed1	G1	zed	G	4
13	4330361_24_Jul_2018_14_48_27.csv	purplestar	0	3	purple	star	870	4	zed1	B1	zed	B	4
13	4330361_24_Jul_2018_14_48_27.csv	redcircle	3	3	red	circle	871	4	zed2	G1	zed	G	4
13	4330361_24_Jul_2018_14_48_27.csv	redstar	0	3	red	star	872	4	zed2	B1	zed	B	4
13	4330361_24_Jul_2018_14_48_27.csv	yellowcircle	3	3	yellow	circle	873	4	bad	G1	bad	G	4
13	4330361_24_Jul_2018_14_48_27.csv	yellowcross	0	3	yellow	cross	874	4	bad	G2	bad	G	4
13	4330361_24_Jul_2018_14_48_27.csv	yellowstar	0	3	yellow	star	875	4	bad	B1	bad	B	4
13	4330361_24_Jul_2018_14_48_27.csv	yellowtriangle	0	3	yellow	triangle	876	4	bad	B2	bad	B	4
13	5026349_24_Jul_2018_13_40_33.csv	bluecircle	3	3	blue	circle	1105	4	good	G1	good	G	4
13	5026349_24_Jul_2018_13_40_33.csv	bluecross	0	3	blue	cross	1106	4	good	G2	good	G	4
13	5026349_24_Jul_2018_13_40_33.csv	bluestar	0	3	blue	star	1107	4	good	B1	good	B	4
13	5026349_24_Jul_2018_13_40_33.csv	bluetriangle	0	3	blue	triangle	1108	4	good	B2	good	B	4
13	5026349_24_Jul_2018_13_40_33.csv	purplecircle	3	3	purple	circle	1109	4	zed1	G1	zed	G	4
13	5026349_24_Jul_2018_13_40_33.csv	purplestar	0	3	purple	star	1110	4	zed1	B1	zed	B	4
13	5026349_24_Jul_2018_13_40_33.csv	redcircle	3	3	red	circle	1111	4	zed2	G1	zed	G	4
13	5026349_24_Jul_2018_13_40_33.csv	redstar	0	3	red	star	1112	4	zed2	B1	zed	B	4
13	5026349_24_Jul_2018_13_40_33.csv	yellowcircle	3	3	yellow	circle	1113	4	bad	G1	bad	G	4
13	5026349_24_Jul_2018_13_40_33.csv	yellowcross	3	3	yellow	cross	1114	4	bad	G2	bad	G	4
13	5026349_24_Jul_2018_13_40_33.csv	yellowstar	0	3	yellow	star	1115	4	bad	B1	bad	B	4
13	5026349_24_Jul_2018_13_40_33.csv	yellowtriangle	0	3	yellow	triangle	1116	4	bad	B2	bad	B	4
13	5235166_19_Jul_2018_13_16_31.csv	bluecircle	0	3	blue	circle	1225	4	good	G1	good	G	2
13	5235166_19_Jul_2018_13_16_31.csv	bluecross	0	3	blue	cross	1226	4	good	G2	good	G	2
13	5235166_19_Jul_2018_13_16_31.csv	bluestar	3	3	blue	star	1227	4	good	B1	good	B	2
13	5235166_19_Jul_2018_13_16_31.csv	bluetriangle	0	3	blue	triangle	1228	4	good	B2	good	B	2
13	5235166_19_Jul_2018_13_16_31.csv	purplecircle	3	3	purple	circle	1229	4	zed1	G1	zed	G	2
13	5235166_19_Jul_2018_13_16_31.csv	purplestar	3	3	purple	star	1230	4	zed1	B1	zed	B	2
13	5235166_19_Jul_2018_13_16_31.csv	redcircle	3	3	red	circle	1231	4	zed2	G1	zed	G	2
13	5235166_19_Jul_2018_13_16_31.csv	redstar	3	3	red	star	1232	4	zed2	B1	zed	B	2
13	5235166_19_Jul_2018_13_16_31.csv	yellowcircle	0	3	yellow	circle	1233	4	bad	G1	bad	G	2
13	5235166_19_Jul_2018_13_16_31.csv	yellowcross	1	3	yellow	cross	1234	4	bad	G2	bad	G	2
13	5235166_19_Jul_2018_13_16_31.csv	yellowstar	0	3	yellow	star	1235	4	bad	B1	bad	B	2
13	5235166_19_Jul_2018_13_16_31.csv	yellowtriangle	0	3	yellow	triangle	1236	4	bad	B2	bad	B	2
13	6571929_24_Jul_2018_18_24_26.csv	bluecircle	0	3	blue	circle	1705	4	good	G1	good	G	2
13	6571929_24_Jul_2018_18_24_26.csv	bluecross	0	3	blue	cross	1706	4	good	G2	good	G	2
13	6571929_24_Jul_2018_18_24_26.csv	bluestar	0	3	blue	star	1707	4	good	B1	good	B	2
13	6571929_24_Jul_2018_18_24_26.csv	bluetriangle	0	3	blue	triangle	1708	4	good	B2	good	B	2
13	6571929_24_Jul_2018_18_24_26.csv	purplecircle	0	3	purple	circle	1709	4	zed1	G1	zed	G	2
13	6571929_24_Jul_2018_18_24_26.csv	purplestar	0	3	purple	star	1710	4	zed1	B1	zed	B	2
13	6571929_24_Jul_2018_18_24_26.csv	redcircle	1	3	red	circle	1711	4	zed2	G1	zed	G	2
13	6571929_24_Jul_2018_18_24_26.csv	redstar	0	3	red	star	1712	4	zed2	B1	zed	B	2
13	6571929_24_Jul_2018_18_24_26.csv	yellowcircle	0	3	yellow	circle	1713	4	bad	G1	bad	G	2
13	6571929_24_Jul_2018_18_24_26.csv	yellowcross	0	3	yellow	cross	1714	4	bad	G2	bad	G	2
13	6571929_24_Jul_2018_18_24_26.csv	yellowstar	0	3	yellow	star	1715	4	bad	B1	bad	B	2
13	6571929_24_Jul_2018_18_24_26.csv	yellowtriangle	0	3	yellow	triangle	1716	4	bad	B2	bad	B	2
13	7665085_24_Jul_2018_12_50_53.csv	bluecircle	3	3	blue	circle	2125	4	good	G1	good	G	5
13	7665085_24_Jul_2018_12_50_53.csv	bluecross	0	3	blue	cross	2126	4	good	G2	good	G	5
13	7665085_24_Jul_2018_12_50_53.csv	bluestar	0	3	blue	star	2127	4	good	B1	good	B	5
13	7665085_24_Jul_2018_12_50_53.csv	bluetriangle	0	3	blue	triangle	2128	4	good	B2	good	B	5
13	7665085_24_Jul_2018_12_50_53.csv	purplecircle	3	3	purple	circle	2129	4	zed1	G1	zed	G	5
13	7665085_24_Jul_2018_12_50_53.csv	purplestar	0	3	purple	star	2130	4	zed1	B1	zed	B	5
13	7665085_24_Jul_2018_12_50_53.csv	redcircle	3	3	red	circle	2131	4	zed2	G1	zed	G	5
13	7665085_24_Jul_2018_12_50_53.csv	redstar	0	3	red	star	2132	4	zed2	B1	zed	B	5
13	7665085_24_Jul_2018_12_50_53.csv	yellowcircle	3	3	yellow	circle	2133	4	bad	G1	bad	G	5
13	7665085_24_Jul_2018_12_50_53.csv	yellowcross	0	3	yellow	cross	2134	4	bad	G2	bad	G	5
13	7665085_24_Jul_2018_12_50_53.csv	yellowstar	0	3	yellow	star	2135	4	bad	B1	bad	B	5
13	7665085_24_Jul_2018_12_50_53.csv	yellowtriangle	0	3	yellow	triangle	2136	4	bad	B2	bad	B	5
13	9016068_24_Jul_2018_13_16_18.csv	bluecircle	3	3	blue	circle	2449	4	good	G1	good	G	5
13	9016068_24_Jul_2018_13_16_18.csv	bluecross	0	3	blue	cross	2450	4	good	G2	good	G	5
13	9016068_24_Jul_2018_13_16_18.csv	bluestar	0	3	blue	star	2451	4	good	B1	good	B	5
13	9016068_24_Jul_2018_13_16_18.csv	bluetriangle	0	3	blue	triangle	2452	4	good	B2	good	B	5
13	9016068_24_Jul_2018_13_16_18.csv	purplecircle	3	3	purple	circle	2453	4	zed1	G1	zed	G	5
13	9016068_24_Jul_2018_13_16_18.csv	purplestar	0	3	purple	star	2454	4	zed1	B1	zed	B	5
13	9016068_24_Jul_2018_13_16_18.csv	redcircle	3	3	red	circle	2455	4	zed2	G1	zed	G	5
13	9016068_24_Jul_2018_13_16_18.csv	redstar	0	3	red	star	2456	4	zed2	B1	zed	B	5
13	9016068_24_Jul_2018_13_16_18.csv	yellowcircle	3	3	yellow	circle	2457	4	bad	G1	bad	G	5
13	9016068_24_Jul_2018_13_16_18.csv	yellowcross	0	3	yellow	cross	2458	4	bad	G2	bad	G	5
13	9016068_24_Jul_2018_13_16_18.csv	yellowstar	0	3	yellow	star	2459	4	bad	B1	bad	B	5
13	9016068_24_Jul_2018_13_16_18.csv	yellowtriangle	0	3	yellow	triangle	2460	4	bad	B2	bad	B	5
13	936681_23_Jul_2018_13_23_59.csv	bluecircle	3	3	blue	circle	2569	4	good	G1	good	G	2
13	936681_23_Jul_2018_13_23_59.csv	bluecross	2	3	blue	cross	2570	4	good	G2	good	G	2
13	936681_23_Jul_2018_13_23_59.csv	bluestar	0	3	blue	star	2571	4	good	B1	good	B	2
13	936681_23_Jul_2018_13_23_59.csv	bluetriangle	0	3	blue	triangle	2572	4	good	B2	good	B	2
13	936681_23_Jul_2018_13_23_59.csv	purplecircle	0	3	purple	circle	2573	4	zed1	G1	zed	G	2
13	936681_23_Jul_2018_13_23_59.csv	purplestar	0	3	purple	star	2574	4	zed1	B1	zed	B	2
13	936681_23_Jul_2018_13_23_59.csv	redcircle	0	3	red	circle	2575	4	zed2	G1	zed	G	2
13	936681_23_Jul_2018_13_23_59.csv	redstar	0	3	red	star	2576	4	zed2	B1	zed	B	2
13	936681_23_Jul_2018_13_23_59.csv	yellowcircle	3	3	yellow	circle	2577	4	bad	G1	bad	G	2
13	936681_23_Jul_2018_13_23_59.csv	yellowcross	3	3	yellow	cross	2578	4	bad	G2	bad	G	2
13	936681_23_Jul_2018_13_23_59.csv	yellowstar	0	3	yellow	star	2579	4	bad	B1	bad	B	2
13	936681_23_Jul_2018_13_23_59.csv	yellowtriangle	0	3	yellow	triangle	2580	4	bad	B2	bad	B	2
14	120051_26_Jul_2018_14_24_41.csv	bluecircle	3	3	blue	circle	97	4	bad	B1	bad	B	4
14	120051_26_Jul_2018_14_24_41.csv	bluecross	0	3	blue	cross	98	4	bad	B2	bad	B	4
14	120051_26_Jul_2018_14_24_41.csv	bluestar	0	3	blue	star	99	4	bad	G1	bad	G	4
14	120051_26_Jul_2018_14_24_41.csv	bluetriangle	0	3	blue	triangle	100	4	bad	G2	bad	G	4
14	120051_26_Jul_2018_14_24_41.csv	purplecircle	3	3	purple	circle	101	4	zed2	B1	zed	B	4
14	120051_26_Jul_2018_14_24_41.csv	purplestar	0	3	purple	star	102	4	zed2	G1	zed	G	4
14	120051_26_Jul_2018_14_24_41.csv	redcircle	3	3	red	circle	103	4	zed1	B1	zed	B	4
14	120051_26_Jul_2018_14_24_41.csv	redstar	0	3	red	star	104	4	zed1	G1	zed	G	4
14	120051_26_Jul_2018_14_24_41.csv	yellowcircle	3	3	yellow	circle	105	4	good	B1	good	B	4
14	120051_26_Jul_2018_14_24_41.csv	yellowcross	0	3	yellow	cross	106	4	good	B2	good	B	4
14	120051_26_Jul_2018_14_24_41.csv	yellowstar	0	3	yellow	star	107	4	good	G1	good	G	4
14	120051_26_Jul_2018_14_24_41.csv	yellowtriangle	0	3	yellow	triangle	108	4	good	G2	good	G	4
14	266171_24_Jul_2018_18_31_40.csv	bluecircle	0	3	blue	circle	337	4	bad	B1	bad	B	2
14	266171_24_Jul_2018_18_31_40.csv	bluecross	0	3	blue	cross	338	4	bad	B2	bad	B	2
14	266171_24_Jul_2018_18_31_40.csv	bluestar	3	3	blue	star	339	4	bad	G1	bad	G	2
14	266171_24_Jul_2018_18_31_40.csv	bluetriangle	0	3	blue	triangle	340	4	bad	G2	bad	G	2
14	266171_24_Jul_2018_18_31_40.csv	purplecircle	0	3	purple	circle	341	4	zed2	B1	zed	B	2
14	266171_24_Jul_2018_18_31_40.csv	purplestar	3	3	purple	star	342	4	zed2	G1	zed	G	2
14	266171_24_Jul_2018_18_31_40.csv	redcircle	0	3	red	circle	343	4	zed1	B1	zed	B	2
14	266171_24_Jul_2018_18_31_40.csv	redstar	0	3	red	star	344	4	zed1	G1	zed	G	2
14	266171_24_Jul_2018_18_31_40.csv	yellowcircle	0	3	yellow	circle	345	4	good	B1	good	B	2
14	266171_24_Jul_2018_18_31_40.csv	yellowcross	0	3	yellow	cross	346	4	good	B2	good	B	2
14	266171_24_Jul_2018_18_31_40.csv	yellowstar	3	3	yellow	star	347	4	good	G1	good	G	2
14	266171_24_Jul_2018_18_31_40.csv	yellowtriangle	3	3	yellow	triangle	348	4	good	G2	good	G	2
14	321929_02_Aug_2018_16_40_29.csv	bluecircle	3	3	blue	circle	457	4	bad	B1	bad	B	5
14	321929_02_Aug_2018_16_40_29.csv	bluecross	3	3	blue	cross	458	4	bad	B2	bad	B	5
14	321929_02_Aug_2018_16_40_29.csv	bluestar	3	3	blue	star	459	4	bad	G1	bad	G	5
14	321929_02_Aug_2018_16_40_29.csv	bluetriangle	3	3	blue	triangle	460	4	bad	G2	bad	G	5
14	321929_02_Aug_2018_16_40_29.csv	purplecircle	3	3	purple	circle	461	4	zed2	B1	zed	B	5
14	321929_02_Aug_2018_16_40_29.csv	purplestar	3	3	purple	star	462	4	zed2	G1	zed	G	5
14	321929_02_Aug_2018_16_40_29.csv	redcircle	3	3	red	circle	463	4	zed1	B1	zed	B	5
14	321929_02_Aug_2018_16_40_29.csv	redstar	3	3	red	star	464	4	zed1	G1	zed	G	5
14	321929_02_Aug_2018_16_40_29.csv	yellowcircle	3	3	yellow	circle	465	4	good	B1	good	B	5
14	321929_02_Aug_2018_16_40_29.csv	yellowcross	3	3	yellow	cross	466	4	good	B2	good	B	5
14	321929_02_Aug_2018_16_40_29.csv	yellowstar	3	3	yellow	star	467	4	good	G1	good	G	5
14	321929_02_Aug_2018_16_40_29.csv	yellowtriangle	3	3	yellow	triangle	468	4	good	G2	good	G	5
14	3541439_19_Jul_2018_13_49_09.csv	bluecircle	0	3	blue	circle	625	4	bad	B1	bad	B	4
14	3541439_19_Jul_2018_13_49_09.csv	bluecross	0	3	blue	cross	626	4	bad	B2	bad	B	4
14	3541439_19_Jul_2018_13_49_09.csv	bluestar	3	3	blue	star	627	4	bad	G1	bad	G	4
14	3541439_19_Jul_2018_13_49_09.csv	bluetriangle	0	3	blue	triangle	628	4	bad	G2	bad	G	4
14	3541439_19_Jul_2018_13_49_09.csv	purplecircle	0	3	purple	circle	629	4	zed2	B1	zed	B	4
14	3541439_19_Jul_2018_13_49_09.csv	purplestar	0	3	purple	star	630	4	zed2	G1	zed	G	4
14	3541439_19_Jul_2018_13_49_09.csv	redcircle	0	3	red	circle	631	4	zed1	B1	zed	B	4
14	3541439_19_Jul_2018_13_49_09.csv	redstar	3	3	red	star	632	4	zed1	G1	zed	G	4
14	3541439_19_Jul_2018_13_49_09.csv	yellowcircle	0	3	yellow	circle	633	4	good	B1	good	B	4
14	3541439_19_Jul_2018_13_49_09.csv	yellowcross	0	3	yellow	cross	634	4	good	B2	good	B	4
14	3541439_19_Jul_2018_13_49_09.csv	yellowstar	0	3	yellow	star	635	4	good	G1	good	G	4
14	3541439_19_Jul_2018_13_49_09.csv	yellowtriangle	0	3	yellow	triangle	636	4	good	G2	good	G	4
14	3916372_02_Aug_2018_11_47_22.csv	bluecircle	0	3	blue	circle	685	4	bad	B1	bad	B	4
14	3916372_02_Aug_2018_11_47_22.csv	bluecross	0	3	blue	cross	686	4	bad	B2	bad	B	4
14	3916372_02_Aug_2018_11_47_22.csv	bluestar	0	3	blue	star	687	4	bad	G1	bad	G	4
14	3916372_02_Aug_2018_11_47_22.csv	bluetriangle	0	3	blue	triangle	688	4	bad	G2	bad	G	4
14	3916372_02_Aug_2018_11_47_22.csv	purplecircle	0	3	purple	circle	689	4	zed2	B1	zed	B	4
14	3916372_02_Aug_2018_11_47_22.csv	purplestar	0	3	purple	star	690	4	zed2	G1	zed	G	4
14	3916372_02_Aug_2018_11_47_22.csv	redcircle	3	3	red	circle	691	4	zed1	B1	zed	B	4
14	3916372_02_Aug_2018_11_47_22.csv	redstar	3	3	red	star	692	4	zed1	G1	zed	G	4
14	3916372_02_Aug_2018_11_47_22.csv	yellowcircle	0	3	yellow	circle	693	4	good	B1	good	B	4
14	3916372_02_Aug_2018_11_47_22.csv	yellowcross	0	3	yellow	cross	694	4	good	B2	good	B	4
14	3916372_02_Aug_2018_11_47_22.csv	yellowstar	3	3	yellow	star	695	4	good	G1	good	G	4
14	3916372_02_Aug_2018_11_47_22.csv	yellowtriangle	0	3	yellow	triangle	696	4	good	G2	good	G	4
14	4065830_24_Jul_2018_15_19_47.csv	bluecircle	0	3	blue	circle	745	4	bad	B1	bad	B	5
14	4065830_24_Jul_2018_15_19_47.csv	bluecross	3	3	blue	cross	746	4	bad	B2	bad	B	5
14	4065830_24_Jul_2018_15_19_47.csv	bluestar	0	3	blue	star	747	4	bad	G1	bad	G	5
14	4065830_24_Jul_2018_15_19_47.csv	bluetriangle	0	3	blue	triangle	748	4	bad	G2	bad	G	5
14	4065830_24_Jul_2018_15_19_47.csv	purplecircle	0	3	purple	circle	749	4	zed2	B1	zed	B	5
14	4065830_24_Jul_2018_15_19_47.csv	purplestar	0	3	purple	star	750	4	zed2	G1	zed	G	5
14	4065830_24_Jul_2018_15_19_47.csv	redcircle	3	3	red	circle	751	4	zed1	B1	zed	B	5
14	4065830_24_Jul_2018_15_19_47.csv	redstar	0	3	red	star	752	4	zed1	G1	zed	G	5
14	4065830_24_Jul_2018_15_19_47.csv	yellowcircle	0	3	yellow	circle	753	4	good	B1	good	B	5
14	4065830_24_Jul_2018_15_19_47.csv	yellowcross	3	3	yellow	cross	754	4	good	B2	good	B	5
14	4065830_24_Jul_2018_15_19_47.csv	yellowstar	0	3	yellow	star	755	4	good	G1	good	G	5
14	4065830_24_Jul_2018_15_19_47.csv	yellowtriangle	0	3	yellow	triangle	756	4	good	G2	good	G	5
14	5121335_01_Aug_2018_15_25_45.csv	bluecircle	1	3	blue	circle	1165	4	bad	B1	bad	B	2
14	5121335_01_Aug_2018_15_25_45.csv	bluecross	0	3	blue	cross	1166	4	bad	B2	bad	B	2
14	5121335_01_Aug_2018_15_25_45.csv	bluestar	3	3	blue	star	1167	4	bad	G1	bad	G	2
14	5121335_01_Aug_2018_15_25_45.csv	bluetriangle	3	3	blue	triangle	1168	4	bad	G2	bad	G	2
14	5121335_01_Aug_2018_15_25_45.csv	purplecircle	0	3	purple	circle	1169	4	zed2	B1	zed	B	2
14	5121335_01_Aug_2018_15_25_45.csv	purplestar	0	3	purple	star	1170	4	zed2	G1	zed	G	2
14	5121335_01_Aug_2018_15_25_45.csv	redcircle	0	3	red	circle	1171	4	zed1	B1	zed	B	2
14	5121335_01_Aug_2018_15_25_45.csv	redstar	0	3	red	star	1172	4	zed1	G1	zed	G	2
14	5121335_01_Aug_2018_15_25_45.csv	yellowcircle	0	3	yellow	circle	1173	4	good	B1	good	B	2
14	5121335_01_Aug_2018_15_25_45.csv	yellowcross	0	3	yellow	cross	1174	4	good	B2	good	B	2
14	5121335_01_Aug_2018_15_25_45.csv	yellowstar	3	3	yellow	star	1175	4	good	G1	good	G	2
14	5121335_01_Aug_2018_15_25_45.csv	yellowtriangle	0	3	yellow	triangle	1176	4	good	G2	good	G	2
14	6046641_24_Jul_2018_10_24_47.csv	bluecircle	0	3	blue	circle	1585	4	bad	B1	bad	B	1
14	6046641_24_Jul_2018_10_24_47.csv	bluecross	2	3	blue	cross	1586	4	bad	B2	bad	B	1
14	6046641_24_Jul_2018_10_24_47.csv	bluestar	3	3	blue	star	1587	4	bad	G1	bad	G	1
14	6046641_24_Jul_2018_10_24_47.csv	bluetriangle	3	3	blue	triangle	1588	4	bad	G2	bad	G	1
14	6046641_24_Jul_2018_10_24_47.csv	purplecircle	1	3	purple	circle	1589	4	zed2	B1	zed	B	1
14	6046641_24_Jul_2018_10_24_47.csv	purplestar	3	3	purple	star	1590	4	zed2	G1	zed	G	1
14	6046641_24_Jul_2018_10_24_47.csv	redcircle	1	3	red	circle	1591	4	zed1	B1	zed	B	1
14	6046641_24_Jul_2018_10_24_47.csv	redstar	3	3	red	star	1592	4	zed1	G1	zed	G	1
14	6046641_24_Jul_2018_10_24_47.csv	yellowcircle	2	3	yellow	circle	1593	4	good	B1	good	B	1
14	6046641_24_Jul_2018_10_24_47.csv	yellowcross	0	3	yellow	cross	1594	4	good	B2	good	B	1
14	6046641_24_Jul_2018_10_24_47.csv	yellowstar	3	3	yellow	star	1595	4	good	G1	good	G	1
14	6046641_24_Jul_2018_10_24_47.csv	yellowtriangle	3	3	yellow	triangle	1596	4	good	G2	good	G	1
14	6276180_01_Aug_2018_13_35_31.csv	bluecircle	2	3	blue	circle	1645	4	bad	B1	bad	B	4
14	6276180_01_Aug_2018_13_35_31.csv	bluecross	3	3	blue	cross	1646	4	bad	B2	bad	B	4
14	6276180_01_Aug_2018_13_35_31.csv	bluestar	0	3	blue	star	1647	4	bad	G1	bad	G	4
14	6276180_01_Aug_2018_13_35_31.csv	bluetriangle	1	3	blue	triangle	1648	4	bad	G2	bad	G	4
14	6276180_01_Aug_2018_13_35_31.csv	purplecircle	2	3	purple	circle	1649	4	zed2	B1	zed	B	4
14	6276180_01_Aug_2018_13_35_31.csv	purplestar	2	3	purple	star	1650	4	zed2	G1	zed	G	4
14	6276180_01_Aug_2018_13_35_31.csv	redcircle	1	3	red	circle	1651	4	zed1	B1	zed	B	4
14	6276180_01_Aug_2018_13_35_31.csv	redstar	1	3	red	star	1652	4	zed1	G1	zed	G	4
14	6276180_01_Aug_2018_13_35_31.csv	yellowcircle	0	3	yellow	circle	1653	4	good	B1	good	B	4
14	6276180_01_Aug_2018_13_35_31.csv	yellowcross	1	3	yellow	cross	1654	4	good	B2	good	B	4
14	6276180_01_Aug_2018_13_35_31.csv	yellowstar	2	3	yellow	star	1655	4	good	G1	good	G	4
14	6276180_01_Aug_2018_13_35_31.csv	yellowtriangle	3	3	yellow	triangle	1656	4	good	G2	good	G	4
14	7542477_02_Aug_2018_15_12_38.csv	bluecircle	0	3	blue	circle	1945	4	bad	B1	bad	B	1
14	7542477_02_Aug_2018_15_12_38.csv	bluecross	3	3	blue	cross	1946	4	bad	B2	bad	B	1
14	7542477_02_Aug_2018_15_12_38.csv	bluestar	1	3	blue	star	1947	4	bad	G1	bad	G	1
14	7542477_02_Aug_2018_15_12_38.csv	bluetriangle	0	3	blue	triangle	1948	4	bad	G2	bad	G	1
14	7542477_02_Aug_2018_15_12_38.csv	purplecircle	0	3	purple	circle	1949	4	zed2	B1	zed	B	1
14	7542477_02_Aug_2018_15_12_38.csv	purplestar	0	3	purple	star	1950	4	zed2	G1	zed	G	1
14	7542477_02_Aug_2018_15_12_38.csv	redcircle	0	3	red	circle	1951	4	zed1	B1	zed	B	1
14	7542477_02_Aug_2018_15_12_38.csv	redstar	0	3	red	star	1952	4	zed1	G1	zed	G	1
14	7542477_02_Aug_2018_15_12_38.csv	yellowcircle	3	3	yellow	circle	1953	4	good	B1	good	B	1
14	7542477_02_Aug_2018_15_12_38.csv	yellowcross	3	3	yellow	cross	1954	4	good	B2	good	B	1
14	7542477_02_Aug_2018_15_12_38.csv	yellowstar	3	3	yellow	star	1955	4	good	G1	good	G	1
14	7542477_02_Aug_2018_15_12_38.csv	yellowtriangle	3	3	yellow	triangle	1956	4	good	G2	good	G	1
14	8621936_30_Jul_2018_14_14_23.csv	bluecircle	0	3	blue	circle	2329	4	bad	B1	bad	B	4
14	8621936_30_Jul_2018_14_14_23.csv	bluecross	0	3	blue	cross	2330	4	bad	B2	bad	B	4
14	8621936_30_Jul_2018_14_14_23.csv	bluestar	0	3	blue	star	2331	4	bad	G1	bad	G	4
14	8621936_30_Jul_2018_14_14_23.csv	bluetriangle	0	3	blue	triangle	2332	4	bad	G2	bad	G	4
14	8621936_30_Jul_2018_14_14_23.csv	purplecircle	0	3	purple	circle	2333	4	zed2	B1	zed	B	4
14	8621936_30_Jul_2018_14_14_23.csv	purplestar	0	3	purple	star	2334	4	zed2	G1	zed	G	4
14	8621936_30_Jul_2018_14_14_23.csv	redcircle	0	3	red	circle	2335	4	zed1	B1	zed	B	4
14	8621936_30_Jul_2018_14_14_23.csv	redstar	0	3	red	star	2336	4	zed1	G1	zed	G	4
14	8621936_30_Jul_2018_14_14_23.csv	yellowcircle	3	3	yellow	circle	2337	4	good	B1	good	B	4
14	8621936_30_Jul_2018_14_14_23.csv	yellowcross	3	3	yellow	cross	2338	4	good	B2	good	B	4
14	8621936_30_Jul_2018_14_14_23.csv	yellowstar	3	3	yellow	star	2339	4	good	G1	good	G	4
14	8621936_30_Jul_2018_14_14_23.csv	yellowtriangle	3	3	yellow	triangle	2340	4	good	G2	good	G	4
14	9256005_31_Jul_2018_12_10_34.csv	bluecircle	0	3	blue	circle	2509	4	bad	B1	bad	B	5
14	9256005_31_Jul_2018_12_10_34.csv	bluecross	0	3	blue	cross	2510	4	bad	B2	bad	B	5
14	9256005_31_Jul_2018_12_10_34.csv	bluestar	3	3	blue	star	2511	4	bad	G1	bad	G	5
14	9256005_31_Jul_2018_12_10_34.csv	bluetriangle	0	3	blue	triangle	2512	4	bad	G2	bad	G	5
14	9256005_31_Jul_2018_12_10_34.csv	purplecircle	0	3	purple	circle	2513	4	zed2	B1	zed	B	5
14	9256005_31_Jul_2018_12_10_34.csv	purplestar	3	3	purple	star	2514	4	zed2	G1	zed	G	5
14	9256005_31_Jul_2018_12_10_34.csv	redcircle	0	3	red	circle	2515	4	zed1	B1	zed	B	5
14	9256005_31_Jul_2018_12_10_34.csv	redstar	3	3	red	star	2516	4	zed1	G1	zed	G	5
14	9256005_31_Jul_2018_12_10_34.csv	yellowcircle	0	3	yellow	circle	2517	4	good	B1	good	B	5
14	9256005_31_Jul_2018_12_10_34.csv	yellowcross	0	3	yellow	cross	2518	4	good	B2	good	B	5
14	9256005_31_Jul_2018_12_10_34.csv	yellowstar	3	3	yellow	star	2519	4	good	G1	good	G	5
14	9256005_31_Jul_2018_12_10_34.csv	yellowtriangle	0	3	yellow	triangle	2520	4	good	G2	good	G	5
15	1712470_24_Jul_2018_18_37_45.csv	bluecircle	0	3	blue	circle	217	4	good	G1	good	G	5
15	1712470_24_Jul_2018_18_37_45.csv	bluecross	0	3	blue	cross	218	4	zed2	G1	zed	G	5
15	1712470_24_Jul_2018_18_37_45.csv	bluestar	0	3	blue	star	219	4	bad	G1	bad	G	5
15	1712470_24_Jul_2018_18_37_45.csv	bluetriangle	1	3	blue	triangle	220	4	zed1	G1	zed	G	5
15	1712470_24_Jul_2018_18_37_45.csv	purplecircle	0	3	purple	circle	221	4	good	B2	good	B	5
15	1712470_24_Jul_2018_18_37_45.csv	purplestar	1	3	purple	star	222	4	bad	B2	bad	B	5
15	1712470_24_Jul_2018_18_37_45.csv	redcircle	0	3	red	circle	223	4	good	G2	good	G	5
15	1712470_24_Jul_2018_18_37_45.csv	redstar	0	3	red	star	224	4	bad	G2	bad	G	5
15	1712470_24_Jul_2018_18_37_45.csv	yellowcircle	2	3	yellow	circle	225	4	good	B1	good	B	5
15	1712470_24_Jul_2018_18_37_45.csv	yellowcross	0	3	yellow	cross	226	4	zed2	B1	zed	B	5
15	1712470_24_Jul_2018_18_37_45.csv	yellowstar	3	3	yellow	star	227	4	bad	B1	bad	B	5
15	1712470_24_Jul_2018_18_37_45.csv	yellowtriangle	2	3	yellow	triangle	228	4	zed1	B1	zed	B	5
15	2094719_26_Jul_2018_13_57_25.csv	bluecircle	3	3	blue	circle	277	4	good	G1	good	G	1
15	2094719_26_Jul_2018_13_57_25.csv	bluecross	3	3	blue	cross	278	4	zed2	G1	zed	G	1
15	2094719_26_Jul_2018_13_57_25.csv	bluestar	3	3	blue	star	279	4	bad	G1	bad	G	1
15	2094719_26_Jul_2018_13_57_25.csv	bluetriangle	3	3	blue	triangle	280	4	zed1	G1	zed	G	1
15	2094719_26_Jul_2018_13_57_25.csv	purplecircle	0	3	purple	circle	281	4	good	B2	good	B	1
15	2094719_26_Jul_2018_13_57_25.csv	purplestar	0	3	purple	star	282	4	bad	B2	bad	B	1
15	2094719_26_Jul_2018_13_57_25.csv	redcircle	0	3	red	circle	283	4	good	G2	good	G	1
15	2094719_26_Jul_2018_13_57_25.csv	redstar	0	3	red	star	284	4	bad	G2	bad	G	1
15	2094719_26_Jul_2018_13_57_25.csv	yellowcircle	0	3	yellow	circle	285	4	good	B1	good	B	1
15	2094719_26_Jul_2018_13_57_25.csv	yellowcross	0	3	yellow	cross	286	4	zed2	B1	zed	B	1
15	2094719_26_Jul_2018_13_57_25.csv	yellowstar	0	3	yellow	star	287	4	bad	B1	bad	B	1
15	2094719_26_Jul_2018_13_57_25.csv	yellowtriangle	0	3	yellow	triangle	288	4	zed1	B1	zed	B	1
15	3472168_26_Jul_2018_11_12_46.csv	bluecircle	3	3	blue	circle	565	4	good	G1	good	G	4
15	3472168_26_Jul_2018_11_12_46.csv	bluecross	3	3	blue	cross	566	4	zed2	G1	zed	G	4
15	3472168_26_Jul_2018_11_12_46.csv	bluestar	3	3	blue	star	567	4	bad	G1	bad	G	4
15	3472168_26_Jul_2018_11_12_46.csv	bluetriangle	3	3	blue	triangle	568	4	zed1	G1	zed	G	4
15	3472168_26_Jul_2018_11_12_46.csv	purplecircle	0	3	purple	circle	569	4	good	B2	good	B	4
15	3472168_26_Jul_2018_11_12_46.csv	purplestar	0	3	purple	star	570	4	bad	B2	bad	B	4
15	3472168_26_Jul_2018_11_12_46.csv	redcircle	3	3	red	circle	571	4	good	G2	good	G	4
15	3472168_26_Jul_2018_11_12_46.csv	redstar	3	3	red	star	572	4	bad	G2	bad	G	4
15	3472168_26_Jul_2018_11_12_46.csv	yellowcircle	0	3	yellow	circle	573	4	good	B1	good	B	4
15	3472168_26_Jul_2018_11_12_46.csv	yellowcross	0	3	yellow	cross	574	4	zed2	B1	zed	B	4
15	3472168_26_Jul_2018_11_12_46.csv	yellowstar	0	3	yellow	star	575	4	bad	B1	bad	B	4
15	3472168_26_Jul_2018_11_12_46.csv	yellowtriangle	0	3	yellow	triangle	576	4	zed1	B1	zed	B	4
15	4539653_19_Jul_2018_11_46_30.csv	bluecircle	3	3	blue	circle	985	4	good	G1	good	G	4
15	4539653_19_Jul_2018_11_46_30.csv	bluecross	3	3	blue	cross	986	4	zed2	G1	zed	G	4
15	4539653_19_Jul_2018_11_46_30.csv	bluestar	3	3	blue	star	987	4	bad	G1	bad	G	4
15	4539653_19_Jul_2018_11_46_30.csv	bluetriangle	3	3	blue	triangle	988	4	zed1	G1	zed	G	4
15	4539653_19_Jul_2018_11_46_30.csv	purplecircle	0	3	purple	circle	989	4	good	B2	good	B	4
15	4539653_19_Jul_2018_11_46_30.csv	purplestar	0	3	purple	star	990	4	bad	B2	bad	B	4
15	4539653_19_Jul_2018_11_46_30.csv	redcircle	3	3	red	circle	991	4	good	G2	good	G	4
15	4539653_19_Jul_2018_11_46_30.csv	redstar	3	3	red	star	992	4	bad	G2	bad	G	4
15	4539653_19_Jul_2018_11_46_30.csv	yellowcircle	0	3	yellow	circle	993	4	good	B1	good	B	4
15	4539653_19_Jul_2018_11_46_30.csv	yellowcross	0	3	yellow	cross	994	4	zed2	B1	zed	B	4
15	4539653_19_Jul_2018_11_46_30.csv	yellowstar	0	3	yellow	star	995	4	bad	B1	bad	B	4
15	4539653_19_Jul_2018_11_46_30.csv	yellowtriangle	0	3	yellow	triangle	996	4	zed1	B1	zed	B	4
15	4983982_30_Jul_2018_12_53_03.csv	bluecircle	3	3	blue	circle	1045	4	good	G1	good	G	2
15	4983982_30_Jul_2018_12_53_03.csv	bluecross	0	3	blue	cross	1046	4	zed2	G1	zed	G	2
15	4983982_30_Jul_2018_12_53_03.csv	bluestar	0	3	blue	star	1047	4	bad	G1	bad	G	2
15	4983982_30_Jul_2018_12_53_03.csv	bluetriangle	1	3	blue	triangle	1048	4	zed1	G1	zed	G	2
15	4983982_30_Jul_2018_12_53_03.csv	purplecircle	0	3	purple	circle	1049	4	good	B2	good	B	2
15	4983982_30_Jul_2018_12_53_03.csv	purplestar	0	3	purple	star	1050	4	bad	B2	bad	B	2
15	4983982_30_Jul_2018_12_53_03.csv	redcircle	0	3	red	circle	1051	4	good	G2	good	G	2
15	4983982_30_Jul_2018_12_53_03.csv	redstar	0	3	red	star	1052	4	bad	G2	bad	G	2
15	4983982_30_Jul_2018_12_53_03.csv	yellowcircle	0	3	yellow	circle	1053	4	good	B1	good	B	2
15	4983982_30_Jul_2018_12_53_03.csv	yellowcross	0	3	yellow	cross	1054	4	zed2	B1	zed	B	2
15	4983982_30_Jul_2018_12_53_03.csv	yellowstar	1	3	yellow	star	1055	4	bad	B1	bad	B	2
15	4983982_30_Jul_2018_12_53_03.csv	yellowtriangle	0	3	yellow	triangle	1056	4	zed1	B1	zed	B	2
15	6001869_19_Jul_2018_13_24_44.csv	bluecircle	1	3	blue	circle	1465	4	good	G1	good	G	3
15	6001869_19_Jul_2018_13_24_44.csv	bluecross	1	3	blue	cross	1466	4	zed2	G1	zed	G	3
15	6001869_19_Jul_2018_13_24_44.csv	bluestar	0	3	blue	star	1467	4	bad	G1	bad	G	3
15	6001869_19_Jul_2018_13_24_44.csv	bluetriangle	1	3	blue	triangle	1468	4	zed1	G1	zed	G	3
15	6001869_19_Jul_2018_13_24_44.csv	purplecircle	3	3	purple	circle	1469	4	good	B2	good	B	3
15	6001869_19_Jul_2018_13_24_44.csv	purplestar	2	3	purple	star	1470	4	bad	B2	bad	B	3
15	6001869_19_Jul_2018_13_24_44.csv	redcircle	1	3	red	circle	1471	4	good	G2	good	G	3
15	6001869_19_Jul_2018_13_24_44.csv	redstar	1	3	red	star	1472	4	bad	G2	bad	G	3
15	6001869_19_Jul_2018_13_24_44.csv	yellowcircle	0	3	yellow	circle	1473	4	good	B1	good	B	3
15	6001869_19_Jul_2018_13_24_44.csv	yellowcross	1	3	yellow	cross	1474	4	zed2	B1	zed	B	3
15	6001869_19_Jul_2018_13_24_44.csv	yellowstar	3	3	yellow	star	1475	4	bad	B1	bad	B	3
15	6001869_19_Jul_2018_13_24_44.csv	yellowtriangle	0	3	yellow	triangle	1476	4	zed1	B1	zed	B	3
15	6002854_26_Jul_2018_11_22_36.csv	bluecircle	3	3	blue	circle	1525	4	good	G1	good	G	2
15	6002854_26_Jul_2018_11_22_36.csv	bluecross	0	3	blue	cross	1526	4	zed2	G1	zed	G	2
15	6002854_26_Jul_2018_11_22_36.csv	bluestar	0	3	blue	star	1527	4	bad	G1	bad	G	2
15	6002854_26_Jul_2018_11_22_36.csv	bluetriangle	0	3	blue	triangle	1528	4	zed1	G1	zed	G	2
15	6002854_26_Jul_2018_11_22_36.csv	purplecircle	3	3	purple	circle	1529	4	good	B2	good	B	2
15	6002854_26_Jul_2018_11_22_36.csv	purplestar	0	3	purple	star	1530	4	bad	B2	bad	B	2
15	6002854_26_Jul_2018_11_22_36.csv	redcircle	3	3	red	circle	1531	4	good	G2	good	G	2
15	6002854_26_Jul_2018_11_22_36.csv	redstar	0	3	red	star	1532	4	bad	G2	bad	G	2
15	6002854_26_Jul_2018_11_22_36.csv	yellowcircle	3	3	yellow	circle	1533	4	good	B1	good	B	2
15	6002854_26_Jul_2018_11_22_36.csv	yellowcross	0	3	yellow	cross	1534	4	zed2	B1	zed	B	2
15	6002854_26_Jul_2018_11_22_36.csv	yellowstar	0	3	yellow	star	1535	4	bad	B1	bad	B	2
15	6002854_26_Jul_2018_11_22_36.csv	yellowtriangle	0	3	yellow	triangle	1536	4	zed1	B1	zed	B	2
15	7207597_31_Jul_2018_11_55_07.csv	bluecircle	3	3	blue	circle	1825	4	good	G1	good	G	5
15	7207597_31_Jul_2018_11_55_07.csv	bluecross	0	3	blue	cross	1826	4	zed2	G1	zed	G	5
15	7207597_31_Jul_2018_11_55_07.csv	bluestar	0	3	blue	star	1827	4	bad	G1	bad	G	5
15	7207597_31_Jul_2018_11_55_07.csv	bluetriangle	0	3	blue	triangle	1828	4	zed1	G1	zed	G	5
15	7207597_31_Jul_2018_11_55_07.csv	purplecircle	3	3	purple	circle	1829	4	good	B2	good	B	5
15	7207597_31_Jul_2018_11_55_07.csv	purplestar	0	3	purple	star	1830	4	bad	B2	bad	B	5
15	7207597_31_Jul_2018_11_55_07.csv	redcircle	3	3	red	circle	1831	4	good	G2	good	G	5
15	7207597_31_Jul_2018_11_55_07.csv	redstar	3	3	red	star	1832	4	bad	G2	bad	G	5
15	7207597_31_Jul_2018_11_55_07.csv	yellowcircle	3	3	yellow	circle	1833	4	good	B1	good	B	5
15	7207597_31_Jul_2018_11_55_07.csv	yellowcross	0	3	yellow	cross	1834	4	zed2	B1	zed	B	5
15	7207597_31_Jul_2018_11_55_07.csv	yellowstar	0	3	yellow	star	1835	4	bad	B1	bad	B	5
15	7207597_31_Jul_2018_11_55_07.csv	yellowtriangle	0	3	yellow	triangle	1836	4	zed1	B1	zed	B	5
15	7574009_31_Jul_2018_15_52_50.csv	bluecircle	0	3	blue	circle	2065	4	good	G1	good	G	1
15	7574009_31_Jul_2018_15_52_50.csv	bluecross	0	3	blue	cross	2066	4	zed2	G1	zed	G	1
15	7574009_31_Jul_2018_15_52_50.csv	bluestar	3	3	blue	star	2067	4	bad	G1	bad	G	1
15	7574009_31_Jul_2018_15_52_50.csv	bluetriangle	0	3	blue	triangle	2068	4	zed1	G1	zed	G	1
15	7574009_31_Jul_2018_15_52_50.csv	purplecircle	0	3	purple	circle	2069	4	good	B2	good	B	1
15	7574009_31_Jul_2018_15_52_50.csv	purplestar	3	3	purple	star	2070	4	bad	B2	bad	B	1
15	7574009_31_Jul_2018_15_52_50.csv	redcircle	0	3	red	circle	2071	4	good	G2	good	G	1
15	7574009_31_Jul_2018_15_52_50.csv	redstar	0	3	red	star	2072	4	bad	G2	bad	G	1
15	7574009_31_Jul_2018_15_52_50.csv	yellowcircle	0	3	yellow	circle	2073	4	good	B1	good	B	1
15	7574009_31_Jul_2018_15_52_50.csv	yellowcross	2	3	yellow	cross	2074	4	zed2	B1	zed	B	1
15	7574009_31_Jul_2018_15_52_50.csv	yellowstar	0	3	yellow	star	2075	4	bad	B1	bad	B	1
15	7574009_31_Jul_2018_15_52_50.csv	yellowtriangle	0	3	yellow	triangle	2076	4	zed1	B1	zed	B	1
15	7713374_31_Jul_2018_11_47_46.csv	bluecircle	3	3	blue	circle	2185	4	good	G1	good	G	1
15	7713374_31_Jul_2018_11_47_46.csv	bluecross	0	3	blue	cross	2186	4	zed2	G1	zed	G	1
15	7713374_31_Jul_2018_11_47_46.csv	bluestar	3	3	blue	star	2187	4	bad	G1	bad	G	1
15	7713374_31_Jul_2018_11_47_46.csv	bluetriangle	0	3	blue	triangle	2188	4	zed1	G1	zed	G	1
15	7713374_31_Jul_2018_11_47_46.csv	purplecircle	3	3	purple	circle	2189	4	good	B2	good	B	1
15	7713374_31_Jul_2018_11_47_46.csv	purplestar	0	3	purple	star	2190	4	bad	B2	bad	B	1
15	7713374_31_Jul_2018_11_47_46.csv	redcircle	0	3	red	circle	2191	4	good	G2	good	G	1
15	7713374_31_Jul_2018_11_47_46.csv	redstar	0	3	red	star	2192	4	bad	G2	bad	G	1
15	7713374_31_Jul_2018_11_47_46.csv	yellowcircle	0	3	yellow	circle	2193	4	good	B1	good	B	1
15	7713374_31_Jul_2018_11_47_46.csv	yellowcross	0	3	yellow	cross	2194	4	zed2	B1	zed	B	1
15	7713374_31_Jul_2018_11_47_46.csv	yellowstar	0	3	yellow	star	2195	4	bad	B1	bad	B	1
15	7713374_31_Jul_2018_11_47_46.csv	yellowtriangle	0	3	yellow	triangle	2196	4	zed1	B1	zed	B	1
15	8127934_31_Jul_2018_14_21_55.csv	bluecircle	1	3	blue	circle	2233	4	good	G1	good	G	3
15	8127934_31_Jul_2018_14_21_55.csv	bluecross	3	3	blue	cross	2234	4	zed2	G1	zed	G	3
15	8127934_31_Jul_2018_14_21_55.csv	bluestar	0	3	blue	star	2235	4	bad	G1	bad	G	3
15	8127934_31_Jul_2018_14_21_55.csv	bluetriangle	3	3	blue	triangle	2236	4	zed1	G1	zed	G	3
15	8127934_31_Jul_2018_14_21_55.csv	purplecircle	1	3	purple	circle	2237	4	good	B2	good	B	3
15	8127934_31_Jul_2018_14_21_55.csv	purplestar	0	3	purple	star	2238	4	bad	B2	bad	B	3
15	8127934_31_Jul_2018_14_21_55.csv	redcircle	3	3	red	circle	2239	4	good	G2	good	G	3
15	8127934_31_Jul_2018_14_21_55.csv	redstar	0	3	red	star	2240	4	bad	G2	bad	G	3
15	8127934_31_Jul_2018_14_21_55.csv	yellowcircle	0	3	yellow	circle	2241	4	good	B1	good	B	3
15	8127934_31_Jul_2018_14_21_55.csv	yellowcross	3	3	yellow	cross	2242	4	zed2	B1	zed	B	3
15	8127934_31_Jul_2018_14_21_55.csv	yellowstar	2	3	yellow	star	2243	4	bad	B1	bad	B	3
15	8127934_31_Jul_2018_14_21_55.csv	yellowtriangle	3	3	yellow	triangle	2244	4	zed1	B1	zed	B	3
16	1548495_02_Aug_2018_11_26_27.csv	bluecircle	0	3	blue	circle	157	4	zed2	B1	zed	B	5
16	1548495_02_Aug_2018_11_26_27.csv	bluecross	0	3	blue	cross	158	4	bad	B1	bad	B	5
16	1548495_02_Aug_2018_11_26_27.csv	bluestar	0	3	blue	star	159	4	good	B1	good	B	5
16	1548495_02_Aug_2018_11_26_27.csv	bluetriangle	0	3	blue	triangle	160	4	zed1	B1	zed	B	5
16	1548495_02_Aug_2018_11_26_27.csv	purplecircle	0	3	purple	circle	161	4	bad	G2	bad	G	5
16	1548495_02_Aug_2018_11_26_27.csv	purplestar	1	3	purple	star	162	4	good	G2	good	G	5
16	1548495_02_Aug_2018_11_26_27.csv	redcircle	0	3	red	circle	163	4	bad	B2	bad	B	5
16	1548495_02_Aug_2018_11_26_27.csv	redstar	0	3	red	star	164	4	good	B2	good	B	5
16	1548495_02_Aug_2018_11_26_27.csv	yellowcircle	3	3	yellow	circle	165	4	zed2	G1	zed	G	5
16	1548495_02_Aug_2018_11_26_27.csv	yellowcross	3	3	yellow	cross	166	4	bad	G1	bad	G	5
16	1548495_02_Aug_2018_11_26_27.csv	yellowstar	3	3	yellow	star	167	4	good	G1	good	G	5
16	1548495_02_Aug_2018_11_26_27.csv	yellowtriangle	3	3	yellow	triangle	168	4	zed1	G1	zed	G	5
16	328008_23_Jul_2018_12_01_23.csv	bluecircle	0	3	blue	circle	517	4	zed2	B1	zed	B	2
16	328008_23_Jul_2018_12_01_23.csv	bluecross	0	3	blue	cross	518	4	bad	B1	bad	B	2
16	328008_23_Jul_2018_12_01_23.csv	bluestar	0	3	blue	star	519	4	good	B1	good	B	2
16	328008_23_Jul_2018_12_01_23.csv	bluetriangle	0	3	blue	triangle	520	4	zed1	B1	zed	B	2
16	328008_23_Jul_2018_12_01_23.csv	purplecircle	2	3	purple	circle	521	4	bad	G2	bad	G	2
16	328008_23_Jul_2018_12_01_23.csv	purplestar	3	3	purple	star	522	4	good	G2	good	G	2
16	328008_23_Jul_2018_12_01_23.csv	redcircle	2	3	red	circle	523	4	bad	B2	bad	B	2
16	328008_23_Jul_2018_12_01_23.csv	redstar	3	3	red	star	524	4	good	B2	good	B	2
16	328008_23_Jul_2018_12_01_23.csv	yellowcircle	2	3	yellow	circle	525	4	zed2	G1	zed	G	2
16	328008_23_Jul_2018_12_01_23.csv	yellowcross	0	3	yellow	cross	526	4	bad	G1	bad	G	2
16	328008_23_Jul_2018_12_01_23.csv	yellowstar	3	3	yellow	star	527	4	good	G1	good	G	2
16	328008_23_Jul_2018_12_01_23.csv	yellowtriangle	0	3	yellow	triangle	528	4	zed1	G1	zed	G	2
16	4331854_24_Jul_2018_10_56_21.csv	bluecircle	0	3	blue	circle	925	4	zed2	B1	zed	B	2
16	4331854_24_Jul_2018_10_56_21.csv	bluecross	0	3	blue	cross	926	4	bad	B1	bad	B	2
16	4331854_24_Jul_2018_10_56_21.csv	bluestar	0	3	blue	star	927	4	good	B1	good	B	2
16	4331854_24_Jul_2018_10_56_21.csv	bluetriangle	0	3	blue	triangle	928	4	zed1	B1	zed	B	2
16	4331854_24_Jul_2018_10_56_21.csv	purplecircle	0	3	purple	circle	929	4	bad	G2	bad	G	2
16	4331854_24_Jul_2018_10_56_21.csv	purplestar	0	3	purple	star	930	4	good	G2	good	G	2
16	4331854_24_Jul_2018_10_56_21.csv	redcircle	0	3	red	circle	931	4	bad	B2	bad	B	2
16	4331854_24_Jul_2018_10_56_21.csv	redstar	0	3	red	star	932	4	good	B2	good	B	2
16	4331854_24_Jul_2018_10_56_21.csv	yellowcircle	3	3	yellow	circle	933	4	zed2	G1	zed	G	2
16	4331854_24_Jul_2018_10_56_21.csv	yellowcross	3	3	yellow	cross	934	4	bad	G1	bad	G	2
16	4331854_24_Jul_2018_10_56_21.csv	yellowstar	3	3	yellow	star	935	4	good	G1	good	G	2
16	4331854_24_Jul_2018_10_56_21.csv	yellowtriangle	3	3	yellow	triangle	936	4	zed1	G1	zed	G	2
16	5305787_02_Aug_2018_12_12_29.csv	bluecircle	0	3	blue	circle	1285	4	zed2	B1	zed	B	4
16	5305787_02_Aug_2018_12_12_29.csv	bluecross	1	3	blue	cross	1286	4	bad	B1	bad	B	4
16	5305787_02_Aug_2018_12_12_29.csv	bluestar	2	3	blue	star	1287	4	good	B1	good	B	4
16	5305787_02_Aug_2018_12_12_29.csv	bluetriangle	0	3	blue	triangle	1288	4	zed1	B1	zed	B	4
16	5305787_02_Aug_2018_12_12_29.csv	purplecircle	3	3	purple	circle	1289	4	bad	G2	bad	G	4
16	5305787_02_Aug_2018_12_12_29.csv	purplestar	3	3	purple	star	1290	4	good	G2	good	G	4
16	5305787_02_Aug_2018_12_12_29.csv	redcircle	3	3	red	circle	1291	4	bad	B2	bad	B	4
16	5305787_02_Aug_2018_12_12_29.csv	redstar	3	3	red	star	1292	4	good	B2	good	B	4
16	5305787_02_Aug_2018_12_12_29.csv	yellowcircle	0	3	yellow	circle	1293	4	zed2	G1	zed	G	4
16	5305787_02_Aug_2018_12_12_29.csv	yellowcross	1	3	yellow	cross	1294	4	bad	G1	bad	G	4
16	5305787_02_Aug_2018_12_12_29.csv	yellowstar	0	3	yellow	star	1295	4	good	G1	good	G	4
16	5305787_02_Aug_2018_12_12_29.csv	yellowtriangle	0	3	yellow	triangle	1296	4	zed1	G1	zed	G	4
16	5330634_23_Jul_2018_14_06_01.csv	bluecircle	1	3	blue	circle	1345	4	zed2	B1	zed	B	1
16	5330634_23_Jul_2018_14_06_01.csv	bluecross	2	3	blue	cross	1346	4	bad	B1	bad	B	1
16	5330634_23_Jul_2018_14_06_01.csv	bluestar	1	3	blue	star	1347	4	good	B1	good	B	1
16	5330634_23_Jul_2018_14_06_01.csv	bluetriangle	2	3	blue	triangle	1348	4	zed1	B1	zed	B	1
16	5330634_23_Jul_2018_14_06_01.csv	purplecircle	2	3	purple	circle	1349	4	bad	G2	bad	G	1
16	5330634_23_Jul_2018_14_06_01.csv	purplestar	2	3	purple	star	1350	4	good	G2	good	G	1
16	5330634_23_Jul_2018_14_06_01.csv	redcircle	1	3	red	circle	1351	4	bad	B2	bad	B	1
16	5330634_23_Jul_2018_14_06_01.csv	redstar	1	3	red	star	1352	4	good	B2	good	B	1
16	5330634_23_Jul_2018_14_06_01.csv	yellowcircle	3	3	yellow	circle	1353	4	zed2	G1	zed	G	1
16	5330634_23_Jul_2018_14_06_01.csv	yellowcross	2	3	yellow	cross	1354	4	bad	G1	bad	G	1
16	5330634_23_Jul_2018_14_06_01.csv	yellowstar	1	3	yellow	star	1355	4	good	G1	good	G	1
16	5330634_23_Jul_2018_14_06_01.csv	yellowtriangle	0	3	yellow	triangle	1356	4	zed1	G1	zed	G	1
16	5528023_31_Jul_2018_15_06_37.csv	bluecircle	0	3	blue	circle	1405	4	zed2	B1	zed	B	1
16	5528023_31_Jul_2018_15_06_37.csv	bluecross	0	3	blue	cross	1406	4	bad	B1	bad	B	1
16	5528023_31_Jul_2018_15_06_37.csv	bluestar	0	3	blue	star	1407	4	good	B1	good	B	1
16	5528023_31_Jul_2018_15_06_37.csv	bluetriangle	0	3	blue	triangle	1408	4	zed1	B1	zed	B	1
16	5528023_31_Jul_2018_15_06_37.csv	purplecircle	0	3	purple	circle	1409	4	bad	G2	bad	G	1
16	5528023_31_Jul_2018_15_06_37.csv	purplestar	0	3	purple	star	1410	4	good	G2	good	G	1
16	5528023_31_Jul_2018_15_06_37.csv	redcircle	0	3	red	circle	1411	4	bad	B2	bad	B	1
16	5528023_31_Jul_2018_15_06_37.csv	redstar	0	3	red	star	1412	4	good	B2	good	B	1
16	5528023_31_Jul_2018_15_06_37.csv	yellowcircle	2	3	yellow	circle	1413	4	zed2	G1	zed	G	1
16	5528023_31_Jul_2018_15_06_37.csv	yellowcross	0	3	yellow	cross	1414	4	bad	G1	bad	G	1
16	5528023_31_Jul_2018_15_06_37.csv	yellowstar	3	3	yellow	star	1415	4	good	G1	good	G	1
16	5528023_31_Jul_2018_15_06_37.csv	yellowtriangle	0	3	yellow	triangle	1416	4	zed1	G1	zed	G	1
16	662891_02_Aug_2018_14_48_13.csv	bluecircle	3	3	blue	circle	1765	4	zed2	B1	zed	B	2
16	662891_02_Aug_2018_14_48_13.csv	bluecross	3	3	blue	cross	1766	4	bad	B1	bad	B	2
16	662891_02_Aug_2018_14_48_13.csv	bluestar	3	3	blue	star	1767	4	good	B1	good	B	2
16	662891_02_Aug_2018_14_48_13.csv	bluetriangle	3	3	blue	triangle	1768	4	zed1	B1	zed	B	2
16	662891_02_Aug_2018_14_48_13.csv	purplecircle	3	3	purple	circle	1769	4	bad	G2	bad	G	2
16	662891_02_Aug_2018_14_48_13.csv	purplestar	3	3	purple	star	1770	4	good	G2	good	G	2
16	662891_02_Aug_2018_14_48_13.csv	redcircle	3	3	red	circle	1771	4	bad	B2	bad	B	2
16	662891_02_Aug_2018_14_48_13.csv	redstar	3	3	red	star	1772	4	good	B2	good	B	2
16	662891_02_Aug_2018_14_48_13.csv	yellowcircle	3	3	yellow	circle	1773	4	zed2	G1	zed	G	2
16	662891_02_Aug_2018_14_48_13.csv	yellowcross	3	3	yellow	cross	1774	4	bad	G1	bad	G	2
16	662891_02_Aug_2018_14_48_13.csv	yellowstar	3	3	yellow	star	1775	4	good	G1	good	G	2
16	662891_02_Aug_2018_14_48_13.csv	yellowtriangle	3	3	yellow	triangle	1776	4	zed1	G1	zed	G	2
16	7343055_01_Aug_2018_12_57_11.csv	bluecircle	0	3	blue	circle	1885	4	zed2	B1	zed	B	4
16	7343055_01_Aug_2018_12_57_11.csv	bluecross	0	3	blue	cross	1886	4	bad	B1	bad	B	4
16	7343055_01_Aug_2018_12_57_11.csv	bluestar	3	3	blue	star	1887	4	good	B1	good	B	4
16	7343055_01_Aug_2018_12_57_11.csv	bluetriangle	0	3	blue	triangle	1888	4	zed1	B1	zed	B	4
16	7343055_01_Aug_2018_12_57_11.csv	purplecircle	0	3	purple	circle	1889	4	bad	G2	bad	G	4
16	7343055_01_Aug_2018_12_57_11.csv	purplestar	3	3	purple	star	1890	4	good	G2	good	G	4
16	7343055_01_Aug_2018_12_57_11.csv	redcircle	0	3	red	circle	1891	4	bad	B2	bad	B	4
16	7343055_01_Aug_2018_12_57_11.csv	redstar	3	3	red	star	1892	4	good	B2	good	B	4
16	7343055_01_Aug_2018_12_57_11.csv	yellowcircle	0	3	yellow	circle	1893	4	zed2	G1	zed	G	4
16	7343055_01_Aug_2018_12_57_11.csv	yellowcross	0	3	yellow	cross	1894	4	bad	G1	bad	G	4
16	7343055_01_Aug_2018_12_57_11.csv	yellowstar	3	3	yellow	star	1895	4	good	G1	good	G	4
16	7343055_01_Aug_2018_12_57_11.csv	yellowtriangle	0	3	yellow	triangle	1896	4	zed1	G1	zed	G	4
16	7570864_01_Aug_2018_11_31_15.csv	bluecircle	3	3	blue	circle	2005	4	zed2	B1	zed	B	2
16	7570864_01_Aug_2018_11_31_15.csv	bluecross	0	3	blue	cross	2006	4	bad	B1	bad	B	2
16	7570864_01_Aug_2018_11_31_15.csv	bluestar	0	3	blue	star	2007	4	good	B1	good	B	2
16	7570864_01_Aug_2018_11_31_15.csv	bluetriangle	0	3	blue	triangle	2008	4	zed1	B1	zed	B	2
16	7570864_01_Aug_2018_11_31_15.csv	purplecircle	0	3	purple	circle	2009	4	bad	G2	bad	G	2
16	7570864_01_Aug_2018_11_31_15.csv	purplestar	3	3	purple	star	2010	4	good	G2	good	G	2
16	7570864_01_Aug_2018_11_31_15.csv	redcircle	0	3	red	circle	2011	4	bad	B2	bad	B	2
16	7570864_01_Aug_2018_11_31_15.csv	redstar	0	3	red	star	2012	4	good	B2	good	B	2
16	7570864_01_Aug_2018_11_31_15.csv	yellowcircle	0	3	yellow	circle	2013	4	zed2	G1	zed	G	2
16	7570864_01_Aug_2018_11_31_15.csv	yellowcross	0	3	yellow	cross	2014	4	bad	G1	bad	G	2
16	7570864_01_Aug_2018_11_31_15.csv	yellowstar	3	3	yellow	star	2015	4	good	G1	good	G	2
16	7570864_01_Aug_2018_11_31_15.csv	yellowtriangle	0	3	yellow	triangle	2016	4	zed1	G1	zed	G	2
16	8983212_01_Aug_2018_14_27_48.csv	bluecircle	0	3	blue	circle	2389	4	zed2	B1	zed	B	2
16	8983212_01_Aug_2018_14_27_48.csv	bluecross	1	3	blue	cross	2390	4	bad	B1	bad	B	2
16	8983212_01_Aug_2018_14_27_48.csv	bluestar	2	3	blue	star	2391	4	good	B1	good	B	2
16	8983212_01_Aug_2018_14_27_48.csv	bluetriangle	0	3	blue	triangle	2392	4	zed1	B1	zed	B	2
16	8983212_01_Aug_2018_14_27_48.csv	purplecircle	0	3	purple	circle	2393	4	bad	G2	bad	G	2
16	8983212_01_Aug_2018_14_27_48.csv	purplestar	1	3	purple	star	2394	4	good	G2	good	G	2
16	8983212_01_Aug_2018_14_27_48.csv	redcircle	0	3	red	circle	2395	4	bad	B2	bad	B	2
16	8983212_01_Aug_2018_14_27_48.csv	redstar	1	3	red	star	2396	4	good	B2	good	B	2
16	8983212_01_Aug_2018_14_27_48.csv	yellowcircle	1	3	yellow	circle	2397	4	zed2	G1	zed	G	2
16	8983212_01_Aug_2018_14_27_48.csv	yellowcross	0	3	yellow	cross	2398	4	bad	G1	bad	G	2
16	8983212_01_Aug_2018_14_27_48.csv	yellowstar	0	3	yellow	star	2399	4	good	G1	good	G	2
16	8983212_01_Aug_2018_14_27_48.csv	yellowtriangle	0	3	yellow	triangle	2400	4	zed1	G1	zed	G	2
16	9531703_26_Jul_2018_12_03_24.csv	bluecircle	0	3	blue	circle	2629	4	zed2	B1	zed	B	3
16	9531703_26_Jul_2018_12_03_24.csv	bluecross	0	3	blue	cross	2630	4	bad	B1	bad	B	3
16	9531703_26_Jul_2018_12_03_24.csv	bluestar	0	3	blue	star	2631	4	good	B1	good	B	3
16	9531703_26_Jul_2018_12_03_24.csv	bluetriangle	0	3	blue	triangle	2632	4	zed1	B1	zed	B	3
16	9531703_26_Jul_2018_12_03_24.csv	purplecircle	0	3	purple	circle	2633	4	bad	G2	bad	G	3
16	9531703_26_Jul_2018_12_03_24.csv	purplestar	3	3	purple	star	2634	4	good	G2	good	G	3
16	9531703_26_Jul_2018_12_03_24.csv	redcircle	0	3	red	circle	2635	4	bad	B2	bad	B	3
16	9531703_26_Jul_2018_12_03_24.csv	redstar	0	3	red	star	2636	4	good	B2	good	B	3
16	9531703_26_Jul_2018_12_03_24.csv	yellowcircle	0	3	yellow	circle	2637	4	zed2	G1	zed	G	3
16	9531703_26_Jul_2018_12_03_24.csv	yellowcross	0	3	yellow	cross	2638	4	bad	G1	bad	G	3
16	9531703_26_Jul_2018_12_03_24.csv	yellowstar	3	3	yellow	star	2639	4	good	G1	good	G	3
16	9531703_26_Jul_2018_12_03_24.csv	yellowtriangle	0	3	yellow	triangle	2640	4	zed1	G1	zed	G	3
17	266171_24_Jul_2018_18_31_40.csv	bluecircle	3	3	blue	circle	349	5	good	G1	good	G	1
17	266171_24_Jul_2018_18_31_40.csv	bluecross	0	3	blue	cross	350	5	good	G2	good	G	1
17	266171_24_Jul_2018_18_31_40.csv	bluestar	0	3	blue	star	351	5	good	B1	good	B	1
17	266171_24_Jul_2018_18_31_40.csv	bluetriangle	3	3	blue	triangle	352	5	good	B2	good	B	1
17	266171_24_Jul_2018_18_31_40.csv	purplecircle	3	3	purple	circle	353	5	zed1	G1	zed	G	1
17	266171_24_Jul_2018_18_31_40.csv	purplestar	0	3	purple	star	354	5	zed1	B1	zed	B	1
17	266171_24_Jul_2018_18_31_40.csv	redcircle	0	3	red	circle	355	5	zed2	G1	zed	G	1
17	266171_24_Jul_2018_18_31_40.csv	redstar	0	3	red	star	356	5	zed2	B1	zed	B	1
17	266171_24_Jul_2018_18_31_40.csv	yellowcircle	0	3	yellow	circle	357	5	bad	G1	bad	G	1
17	266171_24_Jul_2018_18_31_40.csv	yellowcross	0	3	yellow	cross	358	5	bad	G2	bad	G	1
17	266171_24_Jul_2018_18_31_40.csv	yellowstar	0	3	yellow	star	359	5	bad	B1	bad	B	1
17	266171_24_Jul_2018_18_31_40.csv	yellowtriangle	0	3	yellow	triangle	360	5	bad	B2	bad	B	1
17	5528023_31_Jul_2018_15_06_37.csv	bluecircle	0	3	blue	circle	1417	5	good	G1	good	G	2
17	5528023_31_Jul_2018_15_06_37.csv	bluecross	3	3	blue	cross	1418	5	good	G2	good	G	2
17	5528023_31_Jul_2018_15_06_37.csv	bluestar	0	3	blue	star	1419	5	good	B1	good	B	2
17	5528023_31_Jul_2018_15_06_37.csv	bluetriangle	0	3	blue	triangle	1420	5	good	B2	good	B	2
17	5528023_31_Jul_2018_15_06_37.csv	purplecircle	0	3	purple	circle	1421	5	zed1	G1	zed	G	2
17	5528023_31_Jul_2018_15_06_37.csv	purplestar	0	3	purple	star	1422	5	zed1	B1	zed	B	2
17	5528023_31_Jul_2018_15_06_37.csv	redcircle	0	3	red	circle	1423	5	zed2	G1	zed	G	2
17	5528023_31_Jul_2018_15_06_37.csv	redstar	0	3	red	star	1424	5	zed2	B1	zed	B	2
17	5528023_31_Jul_2018_15_06_37.csv	yellowcircle	0	3	yellow	circle	1425	5	bad	G1	bad	G	2
17	5528023_31_Jul_2018_15_06_37.csv	yellowcross	0	3	yellow	cross	1426	5	bad	G2	bad	G	2
17	5528023_31_Jul_2018_15_06_37.csv	yellowstar	0	3	yellow	star	1427	5	bad	B1	bad	B	2
17	5528023_31_Jul_2018_15_06_37.csv	yellowtriangle	0	3	yellow	triangle	1428	5	bad	B2	bad	B	2
17	6046641_24_Jul_2018_10_24_47.csv	bluecircle	0	3	blue	circle	1597	5	good	G1	good	G	4
17	6046641_24_Jul_2018_10_24_47.csv	bluecross	1	3	blue	cross	1598	5	good	G2	good	G	4
17	6046641_24_Jul_2018_10_24_47.csv	bluestar	1	3	blue	star	1599	5	good	B1	good	B	4
17	6046641_24_Jul_2018_10_24_47.csv	bluetriangle	3	3	blue	triangle	1600	5	good	B2	good	B	4
17	6046641_24_Jul_2018_10_24_47.csv	purplecircle	0	3	purple	circle	1601	5	zed1	G1	zed	G	4
17	6046641_24_Jul_2018_10_24_47.csv	purplestar	0	3	purple	star	1602	5	zed1	B1	zed	B	4
17	6046641_24_Jul_2018_10_24_47.csv	redcircle	0	3	red	circle	1603	5	zed2	G1	zed	G	4
17	6046641_24_Jul_2018_10_24_47.csv	redstar	0	3	red	star	1604	5	zed2	B1	zed	B	4
17	6046641_24_Jul_2018_10_24_47.csv	yellowcircle	0	3	yellow	circle	1605	5	bad	G1	bad	G	4
17	6046641_24_Jul_2018_10_24_47.csv	yellowcross	1	3	yellow	cross	1606	5	bad	G2	bad	G	4
17	6046641_24_Jul_2018_10_24_47.csv	yellowstar	0	3	yellow	star	1607	5	bad	B1	bad	B	4
17	6046641_24_Jul_2018_10_24_47.csv	yellowtriangle	3	3	yellow	triangle	1608	5	bad	B2	bad	B	4
17	6276180_01_Aug_2018_13_35_31.csv	bluecircle	2	3	blue	circle	1657	5	good	G1	good	G	3
17	6276180_01_Aug_2018_13_35_31.csv	bluecross	0	3	blue	cross	1658	5	good	G2	good	G	3
17	6276180_01_Aug_2018_13_35_31.csv	bluestar	3	3	blue	star	1659	5	good	B1	good	B	3
17	6276180_01_Aug_2018_13_35_31.csv	bluetriangle	2	3	blue	triangle	1660	5	good	B2	good	B	3
17	6276180_01_Aug_2018_13_35_31.csv	purplecircle	2	3	purple	circle	1661	5	zed1	G1	zed	G	3
17	6276180_01_Aug_2018_13_35_31.csv	purplestar	1	3	purple	star	1662	5	zed1	B1	zed	B	3
17	6276180_01_Aug_2018_13_35_31.csv	redcircle	2	3	red	circle	1663	5	zed2	G1	zed	G	3
17	6276180_01_Aug_2018_13_35_31.csv	redstar	1	3	red	star	1664	5	zed2	B1	zed	B	3
17	6276180_01_Aug_2018_13_35_31.csv	yellowcircle	1	3	yellow	circle	1665	5	bad	G1	bad	G	3
17	6276180_01_Aug_2018_13_35_31.csv	yellowcross	0	3	yellow	cross	1666	5	bad	G2	bad	G	3
17	6276180_01_Aug_2018_13_35_31.csv	yellowstar	3	3	yellow	star	1667	5	bad	B1	bad	B	3
17	6276180_01_Aug_2018_13_35_31.csv	yellowtriangle	0	3	yellow	triangle	1668	5	bad	B2	bad	B	3
17	7570864_01_Aug_2018_11_31_15.csv	bluecircle	0	3	blue	circle	2017	5	good	G1	good	G	3
17	7570864_01_Aug_2018_11_31_15.csv	bluecross	3	3	blue	cross	2018	5	good	G2	good	G	3
17	7570864_01_Aug_2018_11_31_15.csv	bluestar	0	3	blue	star	2019	5	good	B1	good	B	3
17	7570864_01_Aug_2018_11_31_15.csv	bluetriangle	0	3	blue	triangle	2020	5	good	B2	good	B	3
17	7570864_01_Aug_2018_11_31_15.csv	purplecircle	0	3	purple	circle	2021	5	zed1	G1	zed	G	3
17	7570864_01_Aug_2018_11_31_15.csv	purplestar	0	3	purple	star	2022	5	zed1	B1	zed	B	3
17	7570864_01_Aug_2018_11_31_15.csv	redcircle	0	3	red	circle	2023	5	zed2	G1	zed	G	3
17	7570864_01_Aug_2018_11_31_15.csv	redstar	0	3	red	star	2024	5	zed2	B1	zed	B	3
17	7570864_01_Aug_2018_11_31_15.csv	yellowcircle	0	3	yellow	circle	2025	5	bad	G1	bad	G	3
17	7570864_01_Aug_2018_11_31_15.csv	yellowcross	3	3	yellow	cross	2026	5	bad	G2	bad	G	3
17	7570864_01_Aug_2018_11_31_15.csv	yellowstar	3	3	yellow	star	2027	5	bad	B1	bad	B	3
17	7570864_01_Aug_2018_11_31_15.csv	yellowtriangle	0	3	yellow	triangle	2028	5	bad	B2	bad	B	3
17	7574009_31_Jul_2018_15_52_50.csv	bluecircle	0	3	blue	circle	2077	5	good	G1	good	G	3
17	7574009_31_Jul_2018_15_52_50.csv	bluecross	0	3	blue	cross	2078	5	good	G2	good	G	3
17	7574009_31_Jul_2018_15_52_50.csv	bluestar	3	3	blue	star	2079	5	good	B1	good	B	3
17	7574009_31_Jul_2018_15_52_50.csv	bluetriangle	0	3	blue	triangle	2080	5	good	B2	good	B	3
17	7574009_31_Jul_2018_15_52_50.csv	purplecircle	0	3	purple	circle	2081	5	zed1	G1	zed	G	3
17	7574009_31_Jul_2018_15_52_50.csv	purplestar	3	3	purple	star	2082	5	zed1	B1	zed	B	3
17	7574009_31_Jul_2018_15_52_50.csv	redcircle	0	3	red	circle	2083	5	zed2	G1	zed	G	3
17	7574009_31_Jul_2018_15_52_50.csv	redstar	0	3	red	star	2084	5	zed2	B1	zed	B	3
17	7574009_31_Jul_2018_15_52_50.csv	yellowcircle	0	3	yellow	circle	2085	5	bad	G1	bad	G	3
17	7574009_31_Jul_2018_15_52_50.csv	yellowcross	0	3	yellow	cross	2086	5	bad	G2	bad	G	3
17	7574009_31_Jul_2018_15_52_50.csv	yellowstar	3	3	yellow	star	2087	5	bad	B1	bad	B	3
17	7574009_31_Jul_2018_15_52_50.csv	yellowtriangle	0	3	yellow	triangle	2088	5	bad	B2	bad	B	3
17	7665085_24_Jul_2018_12_50_53.csv	bluecircle	3	3	blue	circle	2137	5	good	G1	good	G	4
17	7665085_24_Jul_2018_12_50_53.csv	bluecross	0	3	blue	cross	2138	5	good	G2	good	G	4
17	7665085_24_Jul_2018_12_50_53.csv	bluestar	0	3	blue	star	2139	5	good	B1	good	B	4
17	7665085_24_Jul_2018_12_50_53.csv	bluetriangle	3	3	blue	triangle	2140	5	good	B2	good	B	4
17	7665085_24_Jul_2018_12_50_53.csv	purplecircle	3	3	purple	circle	2141	5	zed1	G1	zed	G	4
17	7665085_24_Jul_2018_12_50_53.csv	purplestar	3	3	purple	star	2142	5	zed1	B1	zed	B	4
17	7665085_24_Jul_2018_12_50_53.csv	redcircle	3	3	red	circle	2143	5	zed2	G1	zed	G	4
17	7665085_24_Jul_2018_12_50_53.csv	redstar	0	3	red	star	2144	5	zed2	B1	zed	B	4
17	7665085_24_Jul_2018_12_50_53.csv	yellowcircle	3	3	yellow	circle	2145	5	bad	G1	bad	G	4
17	7665085_24_Jul_2018_12_50_53.csv	yellowcross	0	3	yellow	cross	2146	5	bad	G2	bad	G	4
17	7665085_24_Jul_2018_12_50_53.csv	yellowstar	3	3	yellow	star	2147	5	bad	B1	bad	B	4
17	7665085_24_Jul_2018_12_50_53.csv	yellowtriangle	3	3	yellow	triangle	2148	5	bad	B2	bad	B	4
17	85486_02_Aug_2018_15_53_28.csv	bluecircle	3	3	blue	circle	2281	5	good	G1	good	G	1
17	85486_02_Aug_2018_15_53_28.csv	bluecross	3	3	blue	cross	2282	5	good	G2	good	G	1
17	85486_02_Aug_2018_15_53_28.csv	bluestar	3	3	blue	star	2283	5	good	B1	good	B	1
17	85486_02_Aug_2018_15_53_28.csv	bluetriangle	3	3	blue	triangle	2284	5	good	B2	good	B	1
17	85486_02_Aug_2018_15_53_28.csv	purplecircle	3	3	purple	circle	2285	5	zed1	G1	zed	G	1
17	85486_02_Aug_2018_15_53_28.csv	purplestar	3	3	purple	star	2286	5	zed1	B1	zed	B	1
17	85486_02_Aug_2018_15_53_28.csv	redcircle	3	3	red	circle	2287	5	zed2	G1	zed	G	1
17	85486_02_Aug_2018_15_53_28.csv	redstar	3	3	red	star	2288	5	zed2	B1	zed	B	1
17	85486_02_Aug_2018_15_53_28.csv	yellowcircle	3	3	yellow	circle	2289	5	bad	G1	bad	G	1
17	85486_02_Aug_2018_15_53_28.csv	yellowcross	3	3	yellow	cross	2290	5	bad	G2	bad	G	1
17	85486_02_Aug_2018_15_53_28.csv	yellowstar	3	3	yellow	star	2291	5	bad	B1	bad	B	1
17	85486_02_Aug_2018_15_53_28.csv	yellowtriangle	3	3	yellow	triangle	2292	5	bad	B2	bad	B	1
17	8983212_01_Aug_2018_14_27_48.csv	bluecircle	1	3	blue	circle	2401	5	good	G1	good	G	3
17	8983212_01_Aug_2018_14_27_48.csv	bluecross	0	3	blue	cross	2402	5	good	G2	good	G	3
17	8983212_01_Aug_2018_14_27_48.csv	bluestar	1	3	blue	star	2403	5	good	B1	good	B	3
17	8983212_01_Aug_2018_14_27_48.csv	bluetriangle	0	3	blue	triangle	2404	5	good	B2	good	B	3
17	8983212_01_Aug_2018_14_27_48.csv	purplecircle	0	3	purple	circle	2405	5	zed1	G1	zed	G	3
17	8983212_01_Aug_2018_14_27_48.csv	purplestar	1	3	purple	star	2406	5	zed1	B1	zed	B	3
17	8983212_01_Aug_2018_14_27_48.csv	redcircle	0	3	red	circle	2407	5	zed2	G1	zed	G	3
17	8983212_01_Aug_2018_14_27_48.csv	redstar	2	3	red	star	2408	5	zed2	B1	zed	B	3
17	8983212_01_Aug_2018_14_27_48.csv	yellowcircle	1	3	yellow	circle	2409	5	bad	G1	bad	G	3
17	8983212_01_Aug_2018_14_27_48.csv	yellowcross	0	3	yellow	cross	2410	5	bad	G2	bad	G	3
17	8983212_01_Aug_2018_14_27_48.csv	yellowstar	0	3	yellow	star	2411	5	bad	B1	bad	B	3
17	8983212_01_Aug_2018_14_27_48.csv	yellowtriangle	0	3	yellow	triangle	2412	5	bad	B2	bad	B	3
17	9531703_26_Jul_2018_12_03_24.csv	bluecircle	0	3	blue	circle	2641	5	good	G1	good	G	5
17	9531703_26_Jul_2018_12_03_24.csv	bluecross	3	3	blue	cross	2642	5	good	G2	good	G	5
17	9531703_26_Jul_2018_12_03_24.csv	bluestar	3	3	blue	star	2643	5	good	B1	good	B	5
17	9531703_26_Jul_2018_12_03_24.csv	bluetriangle	0	3	blue	triangle	2644	5	good	B2	good	B	5
17	9531703_26_Jul_2018_12_03_24.csv	purplecircle	0	3	purple	circle	2645	5	zed1	G1	zed	G	5
17	9531703_26_Jul_2018_12_03_24.csv	purplestar	3	3	purple	star	2646	5	zed1	B1	zed	B	5
17	9531703_26_Jul_2018_12_03_24.csv	redcircle	0	3	red	circle	2647	5	zed2	G1	zed	G	5
17	9531703_26_Jul_2018_12_03_24.csv	redstar	3	3	red	star	2648	5	zed2	B1	zed	B	5
17	9531703_26_Jul_2018_12_03_24.csv	yellowcircle	0	3	yellow	circle	2649	5	bad	G1	bad	G	5
17	9531703_26_Jul_2018_12_03_24.csv	yellowcross	3	3	yellow	cross	2650	5	bad	G2	bad	G	5
17	9531703_26_Jul_2018_12_03_24.csv	yellowstar	3	3	yellow	star	2651	5	bad	B1	bad	B	5
17	9531703_26_Jul_2018_12_03_24.csv	yellowtriangle	0	3	yellow	triangle	2652	5	bad	B2	bad	B	5
18	2094719_26_Jul_2018_13_57_25.csv	bluecircle	0	3	blue	circle	289	5	bad	B1	bad	B	5
18	2094719_26_Jul_2018_13_57_25.csv	bluecross	0	3	blue	cross	290	5	bad	B2	bad	B	5
18	2094719_26_Jul_2018_13_57_25.csv	bluestar	0	3	blue	star	291	5	bad	G1	bad	G	5
18	2094719_26_Jul_2018_13_57_25.csv	bluetriangle	0	3	blue	triangle	292	5	bad	G2	bad	G	5
18	2094719_26_Jul_2018_13_57_25.csv	purplecircle	0	3	purple	circle	293	5	zed2	B1	zed	B	5
18	2094719_26_Jul_2018_13_57_25.csv	purplestar	0	3	purple	star	294	5	zed2	G1	zed	G	5
18	2094719_26_Jul_2018_13_57_25.csv	redcircle	0	3	red	circle	295	5	zed1	B1	zed	B	5
18	2094719_26_Jul_2018_13_57_25.csv	redstar	0	3	red	star	296	5	zed1	G1	zed	G	5
18	2094719_26_Jul_2018_13_57_25.csv	yellowcircle	3	3	yellow	circle	297	5	good	B1	good	B	5
18	2094719_26_Jul_2018_13_57_25.csv	yellowcross	3	3	yellow	cross	298	5	good	B2	good	B	5
18	2094719_26_Jul_2018_13_57_25.csv	yellowstar	3	3	yellow	star	299	5	good	G1	good	G	5
18	2094719_26_Jul_2018_13_57_25.csv	yellowtriangle	3	3	yellow	triangle	300	5	good	G2	good	G	5
18	2987451_19_Jul_2018_12_23_35.csv	bluecircle	0	3	blue	circle	409	5	bad	B1	bad	B	4
18	2987451_19_Jul_2018_12_23_35.csv	bluecross	0	3	blue	cross	410	5	bad	B2	bad	B	4
18	2987451_19_Jul_2018_12_23_35.csv	bluestar	0	3	blue	star	411	5	bad	G1	bad	G	4
18	2987451_19_Jul_2018_12_23_35.csv	bluetriangle	1	3	blue	triangle	412	5	bad	G2	bad	G	4
18	2987451_19_Jul_2018_12_23_35.csv	purplecircle	0	3	purple	circle	413	5	zed2	B1	zed	B	4
18	2987451_19_Jul_2018_12_23_35.csv	purplestar	0	3	purple	star	414	5	zed2	G1	zed	G	4
18	2987451_19_Jul_2018_12_23_35.csv	redcircle	0	3	red	circle	415	5	zed1	B1	zed	B	4
18	2987451_19_Jul_2018_12_23_35.csv	redstar	0	3	red	star	416	5	zed1	G1	zed	G	4
18	2987451_19_Jul_2018_12_23_35.csv	yellowcircle	0	3	yellow	circle	417	5	good	B1	good	B	4
18	2987451_19_Jul_2018_12_23_35.csv	yellowcross	0	3	yellow	cross	418	5	good	B2	good	B	4
18	2987451_19_Jul_2018_12_23_35.csv	yellowstar	0	3	yellow	star	419	5	good	G1	good	G	4
18	2987451_19_Jul_2018_12_23_35.csv	yellowtriangle	3	3	yellow	triangle	420	5	good	G2	good	G	4
18	321929_02_Aug_2018_16_40_29.csv	bluecircle	3	3	blue	circle	469	5	bad	B1	bad	B	2
18	321929_02_Aug_2018_16_40_29.csv	bluecross	3	3	blue	cross	470	5	bad	B2	bad	B	2
18	321929_02_Aug_2018_16_40_29.csv	bluestar	3	3	blue	star	471	5	bad	G1	bad	G	2
18	321929_02_Aug_2018_16_40_29.csv	bluetriangle	3	3	blue	triangle	472	5	bad	G2	bad	G	2
18	321929_02_Aug_2018_16_40_29.csv	purplecircle	3	3	purple	circle	473	5	zed2	B1	zed	B	2
18	321929_02_Aug_2018_16_40_29.csv	purplestar	3	3	purple	star	474	5	zed2	G1	zed	G	2
18	321929_02_Aug_2018_16_40_29.csv	redcircle	3	3	red	circle	475	5	zed1	B1	zed	B	2
18	321929_02_Aug_2018_16_40_29.csv	redstar	3	3	red	star	476	5	zed1	G1	zed	G	2
18	321929_02_Aug_2018_16_40_29.csv	yellowcircle	3	3	yellow	circle	477	5	good	B1	good	B	2
18	321929_02_Aug_2018_16_40_29.csv	yellowcross	3	3	yellow	cross	478	5	good	B2	good	B	2
18	321929_02_Aug_2018_16_40_29.csv	yellowstar	3	3	yellow	star	479	5	good	G1	good	G	2
18	321929_02_Aug_2018_16_40_29.csv	yellowtriangle	3	3	yellow	triangle	480	5	good	G2	good	G	2
18	3916372_02_Aug_2018_11_47_22.csv	bluecircle	0	3	blue	circle	697	5	bad	B1	bad	B	5
18	3916372_02_Aug_2018_11_47_22.csv	bluecross	0	3	blue	cross	698	5	bad	B2	bad	B	5
18	3916372_02_Aug_2018_11_47_22.csv	bluestar	0	3	blue	star	699	5	bad	G1	bad	G	5
18	3916372_02_Aug_2018_11_47_22.csv	bluetriangle	3	3	blue	triangle	700	5	bad	G2	bad	G	5
18	3916372_02_Aug_2018_11_47_22.csv	purplecircle	0	3	purple	circle	701	5	zed2	B1	zed	B	5
18	3916372_02_Aug_2018_11_47_22.csv	purplestar	3	3	purple	star	702	5	zed2	G1	zed	G	5
18	3916372_02_Aug_2018_11_47_22.csv	redcircle	0	3	red	circle	703	5	zed1	B1	zed	B	5
18	3916372_02_Aug_2018_11_47_22.csv	redstar	0	3	red	star	704	5	zed1	G1	zed	G	5
18	3916372_02_Aug_2018_11_47_22.csv	yellowcircle	0	3	yellow	circle	705	5	good	B1	good	B	5
18	3916372_02_Aug_2018_11_47_22.csv	yellowcross	0	3	yellow	cross	706	5	good	B2	good	B	5
18	3916372_02_Aug_2018_11_47_22.csv	yellowstar	3	3	yellow	star	707	5	good	G1	good	G	5
18	3916372_02_Aug_2018_11_47_22.csv	yellowtriangle	0	3	yellow	triangle	708	5	good	G2	good	G	5
18	4065830_24_Jul_2018_15_19_47.csv	bluecircle	3	3	blue	circle	757	5	bad	B1	bad	B	3
18	4065830_24_Jul_2018_15_19_47.csv	bluecross	0	3	blue	cross	758	5	bad	B2	bad	B	3
18	4065830_24_Jul_2018_15_19_47.csv	bluestar	0	3	blue	star	759	5	bad	G1	bad	G	3
18	4065830_24_Jul_2018_15_19_47.csv	bluetriangle	3	3	blue	triangle	760	5	bad	G2	bad	G	3
18	4065830_24_Jul_2018_15_19_47.csv	purplecircle	3	3	purple	circle	761	5	zed2	B1	zed	B	3
18	4065830_24_Jul_2018_15_19_47.csv	purplestar	0	3	purple	star	762	5	zed2	G1	zed	G	3
18	4065830_24_Jul_2018_15_19_47.csv	redcircle	3	3	red	circle	763	5	zed1	B1	zed	B	3
18	4065830_24_Jul_2018_15_19_47.csv	redstar	0	3	red	star	764	5	zed1	G1	zed	G	3
18	4065830_24_Jul_2018_15_19_47.csv	yellowcircle	3	3	yellow	circle	765	5	good	B1	good	B	3
18	4065830_24_Jul_2018_15_19_47.csv	yellowcross	0	3	yellow	cross	766	5	good	B2	good	B	3
18	4065830_24_Jul_2018_15_19_47.csv	yellowstar	0	3	yellow	star	767	5	good	G1	good	G	3
18	4065830_24_Jul_2018_15_19_47.csv	yellowtriangle	3	3	yellow	triangle	768	5	good	G2	good	G	3
18	4539653_19_Jul_2018_11_46_30.csv	bluecircle	3	3	blue	circle	997	5	bad	B1	bad	B	5
18	4539653_19_Jul_2018_11_46_30.csv	bluecross	3	3	blue	cross	998	5	bad	B2	bad	B	5
18	4539653_19_Jul_2018_11_46_30.csv	bluestar	3	3	blue	star	999	5	bad	G1	bad	G	5
18	4539653_19_Jul_2018_11_46_30.csv	bluetriangle	3	3	blue	triangle	1000	5	bad	G2	bad	G	5
18	4539653_19_Jul_2018_11_46_30.csv	purplecircle	0	3	purple	circle	1001	5	zed2	B1	zed	B	5
18	4539653_19_Jul_2018_11_46_30.csv	purplestar	0	3	purple	star	1002	5	zed2	G1	zed	G	5
18	4539653_19_Jul_2018_11_46_30.csv	redcircle	0	3	red	circle	1003	5	zed1	B1	zed	B	5
18	4539653_19_Jul_2018_11_46_30.csv	redstar	0	3	red	star	1004	5	zed1	G1	zed	G	5
18	4539653_19_Jul_2018_11_46_30.csv	yellowcircle	1	3	yellow	circle	1005	5	good	B1	good	B	5
18	4539653_19_Jul_2018_11_46_30.csv	yellowcross	3	3	yellow	cross	1006	5	good	B2	good	B	5
18	4539653_19_Jul_2018_11_46_30.csv	yellowstar	3	3	yellow	star	1007	5	good	G1	good	G	5
18	4539653_19_Jul_2018_11_46_30.csv	yellowtriangle	3	3	yellow	triangle	1008	5	good	G2	good	G	5
18	4983982_30_Jul_2018_12_53_03.csv	bluecircle	0	3	blue	circle	1057	5	bad	B1	bad	B	5
18	4983982_30_Jul_2018_12_53_03.csv	bluecross	0	3	blue	cross	1058	5	bad	B2	bad	B	5
18	4983982_30_Jul_2018_12_53_03.csv	bluestar	0	3	blue	star	1059	5	bad	G1	bad	G	5
18	4983982_30_Jul_2018_12_53_03.csv	bluetriangle	0	3	blue	triangle	1060	5	bad	G2	bad	G	5
18	4983982_30_Jul_2018_12_53_03.csv	purplecircle	0	3	purple	circle	1061	5	zed2	B1	zed	B	5
18	4983982_30_Jul_2018_12_53_03.csv	purplestar	0	3	purple	star	1062	5	zed2	G1	zed	G	5
18	4983982_30_Jul_2018_12_53_03.csv	redcircle	0	3	red	circle	1063	5	zed1	B1	zed	B	5
18	4983982_30_Jul_2018_12_53_03.csv	redstar	0	3	red	star	1064	5	zed1	G1	zed	G	5
18	4983982_30_Jul_2018_12_53_03.csv	yellowcircle	0	3	yellow	circle	1065	5	good	B1	good	B	5
18	4983982_30_Jul_2018_12_53_03.csv	yellowcross	3	3	yellow	cross	1066	5	good	B2	good	B	5
18	4983982_30_Jul_2018_12_53_03.csv	yellowstar	3	3	yellow	star	1067	5	good	G1	good	G	5
18	4983982_30_Jul_2018_12_53_03.csv	yellowtriangle	3	3	yellow	triangle	1068	5	good	G2	good	G	5
18	6001869_19_Jul_2018_13_24_44.csv	bluecircle	0	3	blue	circle	1477	5	bad	B1	bad	B	4
18	6001869_19_Jul_2018_13_24_44.csv	bluecross	0	3	blue	cross	1478	5	bad	B2	bad	B	4
18	6001869_19_Jul_2018_13_24_44.csv	bluestar	0	3	blue	star	1479	5	bad	G1	bad	G	4
18	6001869_19_Jul_2018_13_24_44.csv	bluetriangle	0	3	blue	triangle	1480	5	bad	G2	bad	G	4
18	6001869_19_Jul_2018_13_24_44.csv	purplecircle	0	3	purple	circle	1481	5	zed2	B1	zed	B	4
18	6001869_19_Jul_2018_13_24_44.csv	purplestar	2	3	purple	star	1482	5	zed2	G1	zed	G	4
18	6001869_19_Jul_2018_13_24_44.csv	redcircle	0	3	red	circle	1483	5	zed1	B1	zed	B	4
18	6001869_19_Jul_2018_13_24_44.csv	redstar	1	3	red	star	1484	5	zed1	G1	zed	G	4
18	6001869_19_Jul_2018_13_24_44.csv	yellowcircle	3	3	yellow	circle	1485	5	good	B1	good	B	4
18	6001869_19_Jul_2018_13_24_44.csv	yellowcross	3	3	yellow	cross	1486	5	good	B2	good	B	4
18	6001869_19_Jul_2018_13_24_44.csv	yellowstar	3	3	yellow	star	1487	5	good	G1	good	G	4
18	6001869_19_Jul_2018_13_24_44.csv	yellowtriangle	3	3	yellow	triangle	1488	5	good	G2	good	G	4
18	6002854_26_Jul_2018_11_22_36.csv	bluecircle	1	3	blue	circle	1537	5	bad	B1	bad	B	1
18	6002854_26_Jul_2018_11_22_36.csv	bluecross	1	3	blue	cross	1538	5	bad	B2	bad	B	1
18	6002854_26_Jul_2018_11_22_36.csv	bluestar	0	3	blue	star	1539	5	bad	G1	bad	G	1
18	6002854_26_Jul_2018_11_22_36.csv	bluetriangle	0	3	blue	triangle	1540	5	bad	G2	bad	G	1
18	6002854_26_Jul_2018_11_22_36.csv	purplecircle	1	3	purple	circle	1541	5	zed2	B1	zed	B	1
18	6002854_26_Jul_2018_11_22_36.csv	purplestar	1	3	purple	star	1542	5	zed2	G1	zed	G	1
18	6002854_26_Jul_2018_11_22_36.csv	redcircle	1	3	red	circle	1543	5	zed1	B1	zed	B	1
18	6002854_26_Jul_2018_11_22_36.csv	redstar	0	3	red	star	1544	5	zed1	G1	zed	G	1
18	6002854_26_Jul_2018_11_22_36.csv	yellowcircle	0	3	yellow	circle	1545	5	good	B1	good	B	1
18	6002854_26_Jul_2018_11_22_36.csv	yellowcross	0	3	yellow	cross	1546	5	good	B2	good	B	1
18	6002854_26_Jul_2018_11_22_36.csv	yellowstar	0	3	yellow	star	1547	5	good	G1	good	G	1
18	6002854_26_Jul_2018_11_22_36.csv	yellowtriangle	0	3	yellow	triangle	1548	5	good	G2	good	G	1
18	662891_02_Aug_2018_14_48_13.csv	bluecircle	3	3	blue	circle	1777	5	bad	B1	bad	B	1
18	662891_02_Aug_2018_14_48_13.csv	bluecross	3	3	blue	cross	1778	5	bad	B2	bad	B	1
18	662891_02_Aug_2018_14_48_13.csv	bluestar	3	3	blue	star	1779	5	bad	G1	bad	G	1
18	662891_02_Aug_2018_14_48_13.csv	bluetriangle	3	3	blue	triangle	1780	5	bad	G2	bad	G	1
18	662891_02_Aug_2018_14_48_13.csv	purplecircle	3	3	purple	circle	1781	5	zed2	B1	zed	B	1
18	662891_02_Aug_2018_14_48_13.csv	purplestar	3	3	purple	star	1782	5	zed2	G1	zed	G	1
18	662891_02_Aug_2018_14_48_13.csv	redcircle	3	3	red	circle	1783	5	zed1	B1	zed	B	1
18	662891_02_Aug_2018_14_48_13.csv	redstar	3	3	red	star	1784	5	zed1	G1	zed	G	1
18	662891_02_Aug_2018_14_48_13.csv	yellowcircle	3	3	yellow	circle	1785	5	good	B1	good	B	1
18	662891_02_Aug_2018_14_48_13.csv	yellowcross	3	3	yellow	cross	1786	5	good	B2	good	B	1
18	662891_02_Aug_2018_14_48_13.csv	yellowstar	3	3	yellow	star	1787	5	good	G1	good	G	1
18	662891_02_Aug_2018_14_48_13.csv	yellowtriangle	3	3	yellow	triangle	1788	5	good	G2	good	G	1
18	936681_23_Jul_2018_13_23_59.csv	bluecircle	0	3	blue	circle	2581	5	bad	B1	bad	B	4
18	936681_23_Jul_2018_13_23_59.csv	bluecross	0	3	blue	cross	2582	5	bad	B2	bad	B	4
18	936681_23_Jul_2018_13_23_59.csv	bluestar	0	3	blue	star	2583	5	bad	G1	bad	G	4
18	936681_23_Jul_2018_13_23_59.csv	bluetriangle	0	3	blue	triangle	2584	5	bad	G2	bad	G	4
18	936681_23_Jul_2018_13_23_59.csv	purplecircle	0	3	purple	circle	2585	5	zed2	B1	zed	B	4
18	936681_23_Jul_2018_13_23_59.csv	purplestar	0	3	purple	star	2586	5	zed2	G1	zed	G	4
18	936681_23_Jul_2018_13_23_59.csv	redcircle	0	3	red	circle	2587	5	zed1	B1	zed	B	4
18	936681_23_Jul_2018_13_23_59.csv	redstar	0	3	red	star	2588	5	zed1	G1	zed	G	4
18	936681_23_Jul_2018_13_23_59.csv	yellowcircle	3	3	yellow	circle	2589	5	good	B1	good	B	4
18	936681_23_Jul_2018_13_23_59.csv	yellowcross	3	3	yellow	cross	2590	5	good	B2	good	B	4
18	936681_23_Jul_2018_13_23_59.csv	yellowstar	0	3	yellow	star	2591	5	good	G1	good	G	4
18	936681_23_Jul_2018_13_23_59.csv	yellowtriangle	3	3	yellow	triangle	2592	5	good	G2	good	G	4
19	1189458_24_Jul_2018_15_52_30.csv	bluecircle	0	3	blue	circle	49	5	good	G1	good	G	3
19	1189458_24_Jul_2018_15_52_30.csv	bluecross	0	3	blue	cross	50	5	zed2	G1	zed	G	3
19	1189458_24_Jul_2018_15_52_30.csv	bluestar	0	3	blue	star	51	5	bad	G1	bad	G	3
19	1189458_24_Jul_2018_15_52_30.csv	bluetriangle	0	3	blue	triangle	52	5	zed1	G1	zed	G	3
19	1189458_24_Jul_2018_15_52_30.csv	purplecircle	0	3	purple	circle	53	5	good	B2	good	B	3
19	1189458_24_Jul_2018_15_52_30.csv	purplestar	0	3	purple	star	54	5	bad	B2	bad	B	3
19	1189458_24_Jul_2018_15_52_30.csv	redcircle	3	3	red	circle	55	5	good	G2	good	G	3
19	1189458_24_Jul_2018_15_52_30.csv	redstar	3	3	red	star	56	5	bad	G2	bad	G	3
19	1189458_24_Jul_2018_15_52_30.csv	yellowcircle	0	3	yellow	circle	57	5	good	B1	good	B	3
19	1189458_24_Jul_2018_15_52_30.csv	yellowcross	0	3	yellow	cross	58	5	zed2	B1	zed	B	3
19	1189458_24_Jul_2018_15_52_30.csv	yellowstar	1	3	yellow	star	59	5	bad	B1	bad	B	3
19	1189458_24_Jul_2018_15_52_30.csv	yellowtriangle	1	3	yellow	triangle	60	5	zed1	B1	zed	B	3
19	120051_26_Jul_2018_14_24_41.csv	bluecircle	3	3	blue	circle	109	5	good	G1	good	G	2
19	120051_26_Jul_2018_14_24_41.csv	bluecross	1	3	blue	cross	110	5	zed2	G1	zed	G	2
19	120051_26_Jul_2018_14_24_41.csv	bluestar	3	3	blue	star	111	5	bad	G1	bad	G	2
19	120051_26_Jul_2018_14_24_41.csv	bluetriangle	2	3	blue	triangle	112	5	zed1	G1	zed	G	2
19	120051_26_Jul_2018_14_24_41.csv	purplecircle	2	3	purple	circle	113	5	good	B2	good	B	2
19	120051_26_Jul_2018_14_24_41.csv	purplestar	0	3	purple	star	114	5	bad	B2	bad	B	2
19	120051_26_Jul_2018_14_24_41.csv	redcircle	0	3	red	circle	115	5	good	G2	good	G	2
19	120051_26_Jul_2018_14_24_41.csv	redstar	1	3	red	star	116	5	bad	G2	bad	G	2
19	120051_26_Jul_2018_14_24_41.csv	yellowcircle	3	3	yellow	circle	117	5	good	B1	good	B	2
19	120051_26_Jul_2018_14_24_41.csv	yellowcross	0	3	yellow	cross	118	5	zed2	B1	zed	B	2
19	120051_26_Jul_2018_14_24_41.csv	yellowstar	1	3	yellow	star	119	5	bad	B1	bad	B	2
19	120051_26_Jul_2018_14_24_41.csv	yellowtriangle	2	3	yellow	triangle	120	5	zed1	B1	zed	B	2
19	1548495_02_Aug_2018_11_26_27.csv	bluecircle	1	3	blue	circle	169	5	good	G1	good	G	1
19	1548495_02_Aug_2018_11_26_27.csv	bluecross	2	3	blue	cross	170	5	zed2	G1	zed	G	1
19	1548495_02_Aug_2018_11_26_27.csv	bluestar	0	3	blue	star	171	5	bad	G1	bad	G	1
19	1548495_02_Aug_2018_11_26_27.csv	bluetriangle	0	3	blue	triangle	172	5	zed1	G1	zed	G	1
19	1548495_02_Aug_2018_11_26_27.csv	purplecircle	0	3	purple	circle	173	5	good	B2	good	B	1
19	1548495_02_Aug_2018_11_26_27.csv	purplestar	0	3	purple	star	174	5	bad	B2	bad	B	1
19	1548495_02_Aug_2018_11_26_27.csv	redcircle	0	3	red	circle	175	5	good	G2	good	G	1
19	1548495_02_Aug_2018_11_26_27.csv	redstar	0	3	red	star	176	5	bad	G2	bad	G	1
19	1548495_02_Aug_2018_11_26_27.csv	yellowcircle	2	3	yellow	circle	177	5	good	B1	good	B	1
19	1548495_02_Aug_2018_11_26_27.csv	yellowcross	2	3	yellow	cross	178	5	zed2	B1	zed	B	1
19	1548495_02_Aug_2018_11_26_27.csv	yellowstar	0	3	yellow	star	179	5	bad	B1	bad	B	1
19	1548495_02_Aug_2018_11_26_27.csv	yellowtriangle	0	3	yellow	triangle	180	5	zed1	B1	zed	B	1
19	3541439_19_Jul_2018_13_49_09.csv	bluecircle	3	3	blue	circle	637	5	good	G1	good	G	2
19	3541439_19_Jul_2018_13_49_09.csv	bluecross	0	3	blue	cross	638	5	zed2	G1	zed	G	2
19	3541439_19_Jul_2018_13_49_09.csv	bluestar	0	3	blue	star	639	5	bad	G1	bad	G	2
19	3541439_19_Jul_2018_13_49_09.csv	bluetriangle	3	3	blue	triangle	640	5	zed1	G1	zed	G	2
19	3541439_19_Jul_2018_13_49_09.csv	purplecircle	3	3	purple	circle	641	5	good	B2	good	B	2
19	3541439_19_Jul_2018_13_49_09.csv	purplestar	0	3	purple	star	642	5	bad	B2	bad	B	2
19	3541439_19_Jul_2018_13_49_09.csv	redcircle	3	3	red	circle	643	5	good	G2	good	G	2
19	3541439_19_Jul_2018_13_49_09.csv	redstar	0	3	red	star	644	5	bad	G2	bad	G	2
19	3541439_19_Jul_2018_13_49_09.csv	yellowcircle	3	3	yellow	circle	645	5	good	B1	good	B	2
19	3541439_19_Jul_2018_13_49_09.csv	yellowcross	0	3	yellow	cross	646	5	zed2	B1	zed	B	2
19	3541439_19_Jul_2018_13_49_09.csv	yellowstar	0	3	yellow	star	647	5	bad	B1	bad	B	2
19	3541439_19_Jul_2018_13_49_09.csv	yellowtriangle	3	3	yellow	triangle	648	5	zed1	B1	zed	B	2
19	4330361_24_Jul_2018_14_48_27.csv	bluecircle	3	3	blue	circle	877	5	good	G1	good	G	5
19	4330361_24_Jul_2018_14_48_27.csv	bluecross	0	3	blue	cross	878	5	zed2	G1	zed	G	5
19	4330361_24_Jul_2018_14_48_27.csv	bluestar	0	3	blue	star	879	5	bad	G1	bad	G	5
19	4330361_24_Jul_2018_14_48_27.csv	bluetriangle	0	3	blue	triangle	880	5	zed1	G1	zed	G	5
19	4330361_24_Jul_2018_14_48_27.csv	purplecircle	0	3	purple	circle	881	5	good	B2	good	B	5
19	4330361_24_Jul_2018_14_48_27.csv	purplestar	0	3	purple	star	882	5	bad	B2	bad	B	5
19	4330361_24_Jul_2018_14_48_27.csv	redcircle	0	3	red	circle	883	5	good	G2	good	G	5
19	4330361_24_Jul_2018_14_48_27.csv	redstar	0	3	red	star	884	5	bad	G2	bad	G	5
19	4330361_24_Jul_2018_14_48_27.csv	yellowcircle	0	3	yellow	circle	885	5	good	B1	good	B	5
19	4330361_24_Jul_2018_14_48_27.csv	yellowcross	0	3	yellow	cross	886	5	zed2	B1	zed	B	5
19	4330361_24_Jul_2018_14_48_27.csv	yellowstar	0	3	yellow	star	887	5	bad	B1	bad	B	5
19	4330361_24_Jul_2018_14_48_27.csv	yellowtriangle	0	3	yellow	triangle	888	5	zed1	B1	zed	B	5
19	4331854_24_Jul_2018_10_56_21.csv	bluecircle	0	3	blue	circle	937	5	good	G1	good	G	3
19	4331854_24_Jul_2018_10_56_21.csv	bluecross	0	3	blue	cross	938	5	zed2	G1	zed	G	3
19	4331854_24_Jul_2018_10_56_21.csv	bluestar	0	3	blue	star	939	5	bad	G1	bad	G	3
19	4331854_24_Jul_2018_10_56_21.csv	bluetriangle	0	3	blue	triangle	940	5	zed1	G1	zed	G	3
19	4331854_24_Jul_2018_10_56_21.csv	purplecircle	0	3	purple	circle	941	5	good	B2	good	B	3
19	4331854_24_Jul_2018_10_56_21.csv	purplestar	0	3	purple	star	942	5	bad	B2	bad	B	3
19	4331854_24_Jul_2018_10_56_21.csv	redcircle	3	3	red	circle	943	5	good	G2	good	G	3
19	4331854_24_Jul_2018_10_56_21.csv	redstar	3	3	red	star	944	5	bad	G2	bad	G	3
19	4331854_24_Jul_2018_10_56_21.csv	yellowcircle	0	3	yellow	circle	945	5	good	B1	good	B	3
19	4331854_24_Jul_2018_10_56_21.csv	yellowcross	0	3	yellow	cross	946	5	zed2	B1	zed	B	3
19	4331854_24_Jul_2018_10_56_21.csv	yellowstar	0	3	yellow	star	947	5	bad	B1	bad	B	3
19	4331854_24_Jul_2018_10_56_21.csv	yellowtriangle	0	3	yellow	triangle	948	5	zed1	B1	zed	B	3
19	5026349_24_Jul_2018_13_40_33.csv	bluecircle	3	3	blue	circle	1117	5	good	G1	good	G	1
19	5026349_24_Jul_2018_13_40_33.csv	bluecross	0	3	blue	cross	1118	5	zed2	G1	zed	G	1
19	5026349_24_Jul_2018_13_40_33.csv	bluestar	0	3	blue	star	1119	5	bad	G1	bad	G	1
19	5026349_24_Jul_2018_13_40_33.csv	bluetriangle	0	3	blue	triangle	1120	5	zed1	G1	zed	G	1
19	5026349_24_Jul_2018_13_40_33.csv	purplecircle	3	3	purple	circle	1121	5	good	B2	good	B	1
19	5026349_24_Jul_2018_13_40_33.csv	purplestar	0	3	purple	star	1122	5	bad	B2	bad	B	1
19	5026349_24_Jul_2018_13_40_33.csv	redcircle	3	3	red	circle	1123	5	good	G2	good	G	1
19	5026349_24_Jul_2018_13_40_33.csv	redstar	0	3	red	star	1124	5	bad	G2	bad	G	1
19	5026349_24_Jul_2018_13_40_33.csv	yellowcircle	3	3	yellow	circle	1125	5	good	B1	good	B	1
19	5026349_24_Jul_2018_13_40_33.csv	yellowcross	0	3	yellow	cross	1126	5	zed2	B1	zed	B	1
19	5026349_24_Jul_2018_13_40_33.csv	yellowstar	0	3	yellow	star	1127	5	bad	B1	bad	B	1
19	5026349_24_Jul_2018_13_40_33.csv	yellowtriangle	0	3	yellow	triangle	1128	5	zed1	B1	zed	B	1
19	6571929_24_Jul_2018_18_24_26.csv	bluecircle	3	3	blue	circle	1717	5	good	G1	good	G	4
19	6571929_24_Jul_2018_18_24_26.csv	bluecross	0	3	blue	cross	1718	5	zed2	G1	zed	G	4
19	6571929_24_Jul_2018_18_24_26.csv	bluestar	0	3	blue	star	1719	5	bad	G1	bad	G	4
19	6571929_24_Jul_2018_18_24_26.csv	bluetriangle	3	3	blue	triangle	1720	5	zed1	G1	zed	G	4
19	6571929_24_Jul_2018_18_24_26.csv	purplecircle	3	3	purple	circle	1721	5	good	B2	good	B	4
19	6571929_24_Jul_2018_18_24_26.csv	purplestar	0	3	purple	star	1722	5	bad	B2	bad	B	4
19	6571929_24_Jul_2018_18_24_26.csv	redcircle	3	3	red	circle	1723	5	good	G2	good	G	4
19	6571929_24_Jul_2018_18_24_26.csv	redstar	0	3	red	star	1724	5	bad	G2	bad	G	4
19	6571929_24_Jul_2018_18_24_26.csv	yellowcircle	3	3	yellow	circle	1725	5	good	B1	good	B	4
19	6571929_24_Jul_2018_18_24_26.csv	yellowcross	0	3	yellow	cross	1726	5	zed2	B1	zed	B	4
19	6571929_24_Jul_2018_18_24_26.csv	yellowstar	0	3	yellow	star	1727	5	bad	B1	bad	B	4
19	6571929_24_Jul_2018_18_24_26.csv	yellowtriangle	3	3	yellow	triangle	1728	5	zed1	B1	zed	B	4
19	7207597_31_Jul_2018_11_55_07.csv	bluecircle	3	3	blue	circle	1837	5	good	G1	good	G	3
19	7207597_31_Jul_2018_11_55_07.csv	bluecross	0	3	blue	cross	1838	5	zed2	G1	zed	G	3
19	7207597_31_Jul_2018_11_55_07.csv	bluestar	0	3	blue	star	1839	5	bad	G1	bad	G	3
19	7207597_31_Jul_2018_11_55_07.csv	bluetriangle	1	3	blue	triangle	1840	5	zed1	G1	zed	G	3
19	7207597_31_Jul_2018_11_55_07.csv	purplecircle	2	3	purple	circle	1841	5	good	B2	good	B	3
19	7207597_31_Jul_2018_11_55_07.csv	purplestar	0	3	purple	star	1842	5	bad	B2	bad	B	3
19	7207597_31_Jul_2018_11_55_07.csv	redcircle	2	3	red	circle	1843	5	good	G2	good	G	3
19	7207597_31_Jul_2018_11_55_07.csv	redstar	0	3	red	star	1844	5	bad	G2	bad	G	3
19	7207597_31_Jul_2018_11_55_07.csv	yellowcircle	3	3	yellow	circle	1845	5	good	B1	good	B	3
19	7207597_31_Jul_2018_11_55_07.csv	yellowcross	0	3	yellow	cross	1846	5	zed2	B1	zed	B	3
19	7207597_31_Jul_2018_11_55_07.csv	yellowstar	0	3	yellow	star	1847	5	bad	B1	bad	B	3
19	7207597_31_Jul_2018_11_55_07.csv	yellowtriangle	1	3	yellow	triangle	1848	5	zed1	B1	zed	B	3
19	7542477_02_Aug_2018_15_12_38.csv	bluecircle	1	3	blue	circle	1957	5	good	G1	good	G	2
19	7542477_02_Aug_2018_15_12_38.csv	bluecross	1	3	blue	cross	1958	5	zed2	G1	zed	G	2
19	7542477_02_Aug_2018_15_12_38.csv	bluestar	2	3	blue	star	1959	5	bad	G1	bad	G	2
19	7542477_02_Aug_2018_15_12_38.csv	bluetriangle	1	3	blue	triangle	1960	5	zed1	G1	zed	G	2
19	7542477_02_Aug_2018_15_12_38.csv	purplecircle	3	3	purple	circle	1961	5	good	B2	good	B	2
19	7542477_02_Aug_2018_15_12_38.csv	purplestar	3	3	purple	star	1962	5	bad	B2	bad	B	2
19	7542477_02_Aug_2018_15_12_38.csv	redcircle	0	3	red	circle	1963	5	good	G2	good	G	2
19	7542477_02_Aug_2018_15_12_38.csv	redstar	0	3	red	star	1964	5	bad	G2	bad	G	2
19	7542477_02_Aug_2018_15_12_38.csv	yellowcircle	0	3	yellow	circle	1965	5	good	B1	good	B	2
19	7542477_02_Aug_2018_15_12_38.csv	yellowcross	0	3	yellow	cross	1966	5	zed2	B1	zed	B	2
19	7542477_02_Aug_2018_15_12_38.csv	yellowstar	0	3	yellow	star	1967	5	bad	B1	bad	B	2
19	7542477_02_Aug_2018_15_12_38.csv	yellowtriangle	0	3	yellow	triangle	1968	5	zed1	B1	zed	B	2
19	8621936_30_Jul_2018_14_14_23.csv	bluecircle	0	3	blue	circle	2341	5	good	G1	good	G	5
19	8621936_30_Jul_2018_14_14_23.csv	bluecross	0	3	blue	cross	2342	5	zed2	G1	zed	G	5
19	8621936_30_Jul_2018_14_14_23.csv	bluestar	0	3	blue	star	2343	5	bad	G1	bad	G	5
19	8621936_30_Jul_2018_14_14_23.csv	bluetriangle	0	3	blue	triangle	2344	5	zed1	G1	zed	G	5
19	8621936_30_Jul_2018_14_14_23.csv	purplecircle	0	3	purple	circle	2345	5	good	B2	good	B	5
19	8621936_30_Jul_2018_14_14_23.csv	purplestar	0	3	purple	star	2346	5	bad	B2	bad	B	5
19	8621936_30_Jul_2018_14_14_23.csv	redcircle	0	3	red	circle	2347	5	good	G2	good	G	5
19	8621936_30_Jul_2018_14_14_23.csv	redstar	0	3	red	star	2348	5	bad	G2	bad	G	5
19	8621936_30_Jul_2018_14_14_23.csv	yellowcircle	3	3	yellow	circle	2349	5	good	B1	good	B	5
19	8621936_30_Jul_2018_14_14_23.csv	yellowcross	3	3	yellow	cross	2350	5	zed2	B1	zed	B	5
19	8621936_30_Jul_2018_14_14_23.csv	yellowstar	3	3	yellow	star	2351	5	bad	B1	bad	B	5
19	8621936_30_Jul_2018_14_14_23.csv	yellowtriangle	3	3	yellow	triangle	2352	5	zed1	B1	zed	B	5
2	1712470_24_Jul_2018_18_37_45.csv	bluecircle	0	3	blue	circle	181	1	bad	B1	bad	B	3
2	1712470_24_Jul_2018_18_37_45.csv	bluecross	0	3	blue	cross	182	1	bad	Z2	bad	Z	3
2	1712470_24_Jul_2018_18_37_45.csv	bluestar	3	3	blue	star	183	1	bad	G1	bad	G	3
2	1712470_24_Jul_2018_18_37_45.csv	bluetriangle	0	3	blue	triangle	184	1	bad	Z1	bad	Z	3
2	1712470_24_Jul_2018_18_37_45.csv	purplecircle	0	3	purple	circle	185	1	zed2	B1	zed	B	3
2	1712470_24_Jul_2018_18_37_45.csv	purplestar	2	3	purple	star	186	1	zed2	G1	zed	G	3
2	1712470_24_Jul_2018_18_37_45.csv	redcircle	0	3	red	circle	187	1	zed1	B1	zed	B	3
2	1712470_24_Jul_2018_18_37_45.csv	redstar	3	3	red	star	188	1	zed1	G1	zed	G	3
2	1712470_24_Jul_2018_18_37_45.csv	yellowcircle	0	3	yellow	circle	189	1	good	B1	good	B	3
2	1712470_24_Jul_2018_18_37_45.csv	yellowcross	0	3	yellow	cross	190	1	good	Z2	good	Z	3
2	1712470_24_Jul_2018_18_37_45.csv	yellowstar	3	3	yellow	star	191	1	good	G1	good	G	3
2	1712470_24_Jul_2018_18_37_45.csv	yellowtriangle	0	3	yellow	triangle	192	1	good	Z1	good	Z	3
2	2094719_26_Jul_2018_13_57_25.csv	bluecircle	0	3	blue	circle	241	1	bad	B1	bad	B	3
2	2094719_26_Jul_2018_13_57_25.csv	bluecross	0	3	blue	cross	242	1	bad	Z2	bad	Z	3
2	2094719_26_Jul_2018_13_57_25.csv	bluestar	3	3	blue	star	243	1	bad	G1	bad	G	3
2	2094719_26_Jul_2018_13_57_25.csv	bluetriangle	0	3	blue	triangle	244	1	bad	Z1	bad	Z	3
2	2094719_26_Jul_2018_13_57_25.csv	purplecircle	0	3	purple	circle	245	1	zed2	B1	zed	B	3
2	2094719_26_Jul_2018_13_57_25.csv	purplestar	3	3	purple	star	246	1	zed2	G1	zed	G	3
2	2094719_26_Jul_2018_13_57_25.csv	redcircle	0	3	red	circle	247	1	zed1	B1	zed	B	3
2	2094719_26_Jul_2018_13_57_25.csv	redstar	3	3	red	star	248	1	zed1	G1	zed	G	3
2	2094719_26_Jul_2018_13_57_25.csv	yellowcircle	0	3	yellow	circle	249	1	good	B1	good	B	3
2	2094719_26_Jul_2018_13_57_25.csv	yellowcross	0	3	yellow	cross	250	1	good	Z2	good	Z	3
2	2094719_26_Jul_2018_13_57_25.csv	yellowstar	3	3	yellow	star	251	1	good	G1	good	G	3
2	2094719_26_Jul_2018_13_57_25.csv	yellowtriangle	0	3	yellow	triangle	252	1	good	Z1	good	Z	3
2	3916372_02_Aug_2018_11_47_22.csv	bluecircle	2	3	blue	circle	649	1	bad	B1	bad	B	2
2	3916372_02_Aug_2018_11_47_22.csv	bluecross	1	3	blue	cross	650	1	bad	Z2	bad	Z	2
2	3916372_02_Aug_2018_11_47_22.csv	bluestar	1	3	blue	star	651	1	bad	G1	bad	G	2
2	3916372_02_Aug_2018_11_47_22.csv	bluetriangle	0	3	blue	triangle	652	1	bad	Z1	bad	Z	2
2	3916372_02_Aug_2018_11_47_22.csv	purplecircle	0	3	purple	circle	653	1	zed2	B1	zed	B	2
2	3916372_02_Aug_2018_11_47_22.csv	purplestar	1	3	purple	star	654	1	zed2	G1	zed	G	2
2	3916372_02_Aug_2018_11_47_22.csv	redcircle	1	3	red	circle	655	1	zed1	B1	zed	B	2
2	3916372_02_Aug_2018_11_47_22.csv	redstar	0	3	red	star	656	1	zed1	G1	zed	G	2
2	3916372_02_Aug_2018_11_47_22.csv	yellowcircle	1	3	yellow	circle	657	1	good	B1	good	B	2
2	3916372_02_Aug_2018_11_47_22.csv	yellowcross	3	3	yellow	cross	658	1	good	Z2	good	Z	2
2	3916372_02_Aug_2018_11_47_22.csv	yellowstar	0	3	yellow	star	659	1	good	G1	good	G	2
2	3916372_02_Aug_2018_11_47_22.csv	yellowtriangle	1	3	yellow	triangle	660	1	good	Z1	good	Z	2
2	4065830_24_Jul_2018_15_19_47.csv	bluecircle	0	3	blue	circle	709	1	bad	B1	bad	B	4
2	4065830_24_Jul_2018_15_19_47.csv	bluecross	0	3	blue	cross	710	1	bad	Z2	bad	Z	4
2	4065830_24_Jul_2018_15_19_47.csv	bluestar	3	3	blue	star	711	1	bad	G1	bad	G	4
2	4065830_24_Jul_2018_15_19_47.csv	bluetriangle	0	3	blue	triangle	712	1	bad	Z1	bad	Z	4
2	4065830_24_Jul_2018_15_19_47.csv	purplecircle	3	3	purple	circle	713	1	zed2	B1	zed	B	4
2	4065830_24_Jul_2018_15_19_47.csv	purplestar	0	3	purple	star	714	1	zed2	G1	zed	G	4
2	4065830_24_Jul_2018_15_19_47.csv	redcircle	0	3	red	circle	715	1	zed1	B1	zed	B	4
2	4065830_24_Jul_2018_15_19_47.csv	redstar	0	3	red	star	716	1	zed1	G1	zed	G	4
2	4065830_24_Jul_2018_15_19_47.csv	yellowcircle	0	3	yellow	circle	717	1	good	B1	good	B	4
2	4065830_24_Jul_2018_15_19_47.csv	yellowcross	0	3	yellow	cross	718	1	good	Z2	good	Z	4
2	4065830_24_Jul_2018_15_19_47.csv	yellowstar	3	3	yellow	star	719	1	good	G1	good	G	4
2	4065830_24_Jul_2018_15_19_47.csv	yellowtriangle	0	3	yellow	triangle	720	1	good	Z1	good	Z	4
2	5528023_31_Jul_2018_15_06_37.csv	bluecircle	0	3	blue	circle	1369	1	bad	B1	bad	B	3
2	5528023_31_Jul_2018_15_06_37.csv	bluecross	0	3	blue	cross	1370	1	bad	Z2	bad	Z	3
2	5528023_31_Jul_2018_15_06_37.csv	bluestar	3	3	blue	star	1371	1	bad	G1	bad	G	3
2	5528023_31_Jul_2018_15_06_37.csv	bluetriangle	0	3	blue	triangle	1372	1	bad	Z1	bad	Z	3
2	5528023_31_Jul_2018_15_06_37.csv	purplecircle	0	3	purple	circle	1373	1	zed2	B1	zed	B	3
2	5528023_31_Jul_2018_15_06_37.csv	purplestar	1	3	purple	star	1374	1	zed2	G1	zed	G	3
2	5528023_31_Jul_2018_15_06_37.csv	redcircle	0	3	red	circle	1375	1	zed1	B1	zed	B	3
2	5528023_31_Jul_2018_15_06_37.csv	redstar	1	3	red	star	1376	1	zed1	G1	zed	G	3
2	5528023_31_Jul_2018_15_06_37.csv	yellowcircle	0	3	yellow	circle	1377	1	good	B1	good	B	3
2	5528023_31_Jul_2018_15_06_37.csv	yellowcross	0	3	yellow	cross	1378	1	good	Z2	good	Z	3
2	5528023_31_Jul_2018_15_06_37.csv	yellowstar	3	3	yellow	star	1379	1	good	G1	good	G	3
2	5528023_31_Jul_2018_15_06_37.csv	yellowtriangle	0	3	yellow	triangle	1380	1	good	Z1	good	Z	3
2	7207597_31_Jul_2018_11_55_07.csv	bluecircle	0	3	blue	circle	1789	1	bad	B1	bad	B	4
2	7207597_31_Jul_2018_11_55_07.csv	bluecross	0	3	blue	cross	1790	1	bad	Z2	bad	Z	4
2	7207597_31_Jul_2018_11_55_07.csv	bluestar	2	3	blue	star	1791	1	bad	G1	bad	G	4
2	7207597_31_Jul_2018_11_55_07.csv	bluetriangle	0	3	blue	triangle	1792	1	bad	Z1	bad	Z	4
2	7207597_31_Jul_2018_11_55_07.csv	purplecircle	0	3	purple	circle	1793	1	zed2	B1	zed	B	4
2	7207597_31_Jul_2018_11_55_07.csv	purplestar	3	3	purple	star	1794	1	zed2	G1	zed	G	4
2	7207597_31_Jul_2018_11_55_07.csv	redcircle	0	3	red	circle	1795	1	zed1	B1	zed	B	4
2	7207597_31_Jul_2018_11_55_07.csv	redstar	0	3	red	star	1796	1	zed1	G1	zed	G	4
2	7207597_31_Jul_2018_11_55_07.csv	yellowcircle	0	3	yellow	circle	1797	1	good	B1	good	B	4
2	7207597_31_Jul_2018_11_55_07.csv	yellowcross	0	3	yellow	cross	1798	1	good	Z2	good	Z	4
2	7207597_31_Jul_2018_11_55_07.csv	yellowstar	3	3	yellow	star	1799	1	good	G1	good	G	4
2	7207597_31_Jul_2018_11_55_07.csv	yellowtriangle	0	3	yellow	triangle	1800	1	good	Z1	good	Z	4
2	7343055_01_Aug_2018_12_57_11.csv	bluecircle	0	3	blue	circle	1849	1	bad	B1	bad	B	2
2	7343055_01_Aug_2018_12_57_11.csv	bluecross	0	3	blue	cross	1850	1	bad	Z2	bad	Z	2
2	7343055_01_Aug_2018_12_57_11.csv	bluestar	3	3	blue	star	1851	1	bad	G1	bad	G	2
2	7343055_01_Aug_2018_12_57_11.csv	bluetriangle	0	3	blue	triangle	1852	1	bad	Z1	bad	Z	2
2	7343055_01_Aug_2018_12_57_11.csv	purplecircle	0	3	purple	circle	1853	1	zed2	B1	zed	B	2
2	7343055_01_Aug_2018_12_57_11.csv	purplestar	3	3	purple	star	1854	1	zed2	G1	zed	G	2
2	7343055_01_Aug_2018_12_57_11.csv	redcircle	0	3	red	circle	1855	1	zed1	B1	zed	B	2
2	7343055_01_Aug_2018_12_57_11.csv	redstar	0	3	red	star	1856	1	zed1	G1	zed	G	2
2	7343055_01_Aug_2018_12_57_11.csv	yellowcircle	0	3	yellow	circle	1857	1	good	B1	good	B	2
2	7343055_01_Aug_2018_12_57_11.csv	yellowcross	0	3	yellow	cross	1858	1	good	Z2	good	Z	2
2	7343055_01_Aug_2018_12_57_11.csv	yellowstar	3	3	yellow	star	1859	1	good	G1	good	G	2
2	7343055_01_Aug_2018_12_57_11.csv	yellowtriangle	0	3	yellow	triangle	1860	1	good	Z1	good	Z	2
2	85486_02_Aug_2018_15_53_28.csv	bluecircle	3	3	blue	circle	2257	1	bad	B1	bad	B	2
2	85486_02_Aug_2018_15_53_28.csv	bluecross	3	3	blue	cross	2258	1	bad	Z2	bad	Z	2
2	85486_02_Aug_2018_15_53_28.csv	bluestar	3	3	blue	star	2259	1	bad	G1	bad	G	2
2	85486_02_Aug_2018_15_53_28.csv	bluetriangle	3	3	blue	triangle	2260	1	bad	Z1	bad	Z	2
2	85486_02_Aug_2018_15_53_28.csv	purplecircle	3	3	purple	circle	2261	1	zed2	B1	zed	B	2
2	85486_02_Aug_2018_15_53_28.csv	purplestar	3	3	purple	star	2262	1	zed2	G1	zed	G	2
2	85486_02_Aug_2018_15_53_28.csv	redcircle	3	3	red	circle	2263	1	zed1	B1	zed	B	2
2	85486_02_Aug_2018_15_53_28.csv	redstar	3	3	red	star	2264	1	zed1	G1	zed	G	2
2	85486_02_Aug_2018_15_53_28.csv	yellowcircle	3	3	yellow	circle	2265	1	good	B1	good	B	2
2	85486_02_Aug_2018_15_53_28.csv	yellowcross	3	3	yellow	cross	2266	1	good	Z2	good	Z	2
2	85486_02_Aug_2018_15_53_28.csv	yellowstar	3	3	yellow	star	2267	1	good	G1	good	G	2
2	85486_02_Aug_2018_15_53_28.csv	yellowtriangle	3	3	yellow	triangle	2268	1	good	Z1	good	Z	2
2	8983212_01_Aug_2018_14_27_48.csv	bluecircle	0	3	blue	circle	2353	1	bad	B1	bad	B	1
2	8983212_01_Aug_2018_14_27_48.csv	bluecross	1	3	blue	cross	2354	1	bad	Z2	bad	Z	1
2	8983212_01_Aug_2018_14_27_48.csv	bluestar	0	3	blue	star	2355	1	bad	G1	bad	G	1
2	8983212_01_Aug_2018_14_27_48.csv	bluetriangle	0	3	blue	triangle	2356	1	bad	Z1	bad	Z	1
2	8983212_01_Aug_2018_14_27_48.csv	purplecircle	1	3	purple	circle	2357	1	zed2	B1	zed	B	1
2	8983212_01_Aug_2018_14_27_48.csv	purplestar	1	3	purple	star	2358	1	zed2	G1	zed	G	1
2	8983212_01_Aug_2018_14_27_48.csv	redcircle	0	3	red	circle	2359	1	zed1	B1	zed	B	1
2	8983212_01_Aug_2018_14_27_48.csv	redstar	1	3	red	star	2360	1	zed1	G1	zed	G	1
2	8983212_01_Aug_2018_14_27_48.csv	yellowcircle	0	3	yellow	circle	2361	1	good	B1	good	B	1
2	8983212_01_Aug_2018_14_27_48.csv	yellowcross	1	3	yellow	cross	2362	1	good	Z2	good	Z	1
2	8983212_01_Aug_2018_14_27_48.csv	yellowstar	0	3	yellow	star	2363	1	good	G1	good	G	1
2	8983212_01_Aug_2018_14_27_48.csv	yellowtriangle	0	3	yellow	triangle	2364	1	good	Z1	good	Z	1
2	9256005_31_Jul_2018_12_10_34.csv	bluecircle	0	3	blue	circle	2473	1	bad	B1	bad	B	2
2	9256005_31_Jul_2018_12_10_34.csv	bluecross	0	3	blue	cross	2474	1	bad	Z2	bad	Z	2
2	9256005_31_Jul_2018_12_10_34.csv	bluestar	0	3	blue	star	2475	1	bad	G1	bad	G	2
2	9256005_31_Jul_2018_12_10_34.csv	bluetriangle	0	3	blue	triangle	2476	1	bad	Z1	bad	Z	2
2	9256005_31_Jul_2018_12_10_34.csv	purplecircle	0	3	purple	circle	2477	1	zed2	B1	zed	B	2
2	9256005_31_Jul_2018_12_10_34.csv	purplestar	0	3	purple	star	2478	1	zed2	G1	zed	G	2
2	9256005_31_Jul_2018_12_10_34.csv	redcircle	0	3	red	circle	2479	1	zed1	B1	zed	B	2
2	9256005_31_Jul_2018_12_10_34.csv	redstar	0	3	red	star	2480	1	zed1	G1	zed	G	2
2	9256005_31_Jul_2018_12_10_34.csv	yellowcircle	0	3	yellow	circle	2481	1	good	B1	good	B	2
2	9256005_31_Jul_2018_12_10_34.csv	yellowcross	0	3	yellow	cross	2482	1	good	Z2	good	Z	2
2	9256005_31_Jul_2018_12_10_34.csv	yellowstar	3	3	yellow	star	2483	1	good	G1	good	G	2
2	9256005_31_Jul_2018_12_10_34.csv	yellowtriangle	0	3	yellow	triangle	2484	1	good	Z1	good	Z	2
2	9531703_26_Jul_2018_12_03_24.csv	bluecircle	1	3	blue	circle	2593	1	bad	B1	bad	B	1
2	9531703_26_Jul_2018_12_03_24.csv	bluecross	2	3	blue	cross	2594	1	bad	Z2	bad	Z	1
2	9531703_26_Jul_2018_12_03_24.csv	bluestar	1	3	blue	star	2595	1	bad	G1	bad	G	1
2	9531703_26_Jul_2018_12_03_24.csv	bluetriangle	0	3	blue	triangle	2596	1	bad	Z1	bad	Z	1
2	9531703_26_Jul_2018_12_03_24.csv	purplecircle	1	3	purple	circle	2597	1	zed2	B1	zed	B	1
2	9531703_26_Jul_2018_12_03_24.csv	purplestar	1	3	purple	star	2598	1	zed2	G1	zed	G	1
2	9531703_26_Jul_2018_12_03_24.csv	redcircle	0	3	red	circle	2599	1	zed1	B1	zed	B	1
2	9531703_26_Jul_2018_12_03_24.csv	redstar	1	3	red	star	2600	1	zed1	G1	zed	G	1
2	9531703_26_Jul_2018_12_03_24.csv	yellowcircle	0	3	yellow	circle	2601	1	good	B1	good	B	1
2	9531703_26_Jul_2018_12_03_24.csv	yellowcross	1	3	yellow	cross	2602	1	good	Z2	good	Z	1
2	9531703_26_Jul_2018_12_03_24.csv	yellowstar	2	3	yellow	star	2603	1	good	G1	good	G	1
2	9531703_26_Jul_2018_12_03_24.csv	yellowtriangle	1	3	yellow	triangle	2604	1	good	Z1	good	Z	1
20	1712470_24_Jul_2018_18_37_45.csv	bluecircle	0	3	blue	circle	229	5	zed2	B1	zed	B	4
20	1712470_24_Jul_2018_18_37_45.csv	bluecross	0	3	blue	cross	230	5	bad	B1	bad	B	4
20	1712470_24_Jul_2018_18_37_45.csv	bluestar	0	3	blue	star	231	5	good	B1	good	B	4
20	1712470_24_Jul_2018_18_37_45.csv	bluetriangle	0	3	blue	triangle	232	5	zed1	B1	zed	B	4
20	1712470_24_Jul_2018_18_37_45.csv	purplecircle	0	3	purple	circle	233	5	bad	G2	bad	G	4
20	1712470_24_Jul_2018_18_37_45.csv	purplestar	0	3	purple	star	234	5	good	G2	good	G	4
20	1712470_24_Jul_2018_18_37_45.csv	redcircle	0	3	red	circle	235	5	bad	B2	bad	B	4
20	1712470_24_Jul_2018_18_37_45.csv	redstar	0	3	red	star	236	5	good	B2	good	B	4
20	1712470_24_Jul_2018_18_37_45.csv	yellowcircle	3	3	yellow	circle	237	5	zed2	G1	zed	G	4
20	1712470_24_Jul_2018_18_37_45.csv	yellowcross	3	3	yellow	cross	238	5	bad	G1	bad	G	4
20	1712470_24_Jul_2018_18_37_45.csv	yellowstar	3	3	yellow	star	239	5	good	G1	good	G	4
20	1712470_24_Jul_2018_18_37_45.csv	yellowtriangle	3	3	yellow	triangle	240	5	zed1	G1	zed	G	4
20	3472168_26_Jul_2018_11_12_46.csv	bluecircle	0	3	blue	circle	577	5	zed2	B1	zed	B	5
20	3472168_26_Jul_2018_11_12_46.csv	bluecross	0	3	blue	cross	578	5	bad	B1	bad	B	5
20	3472168_26_Jul_2018_11_12_46.csv	bluestar	0	3	blue	star	579	5	good	B1	good	B	5
20	3472168_26_Jul_2018_11_12_46.csv	bluetriangle	0	3	blue	triangle	580	5	zed1	B1	zed	B	5
20	3472168_26_Jul_2018_11_12_46.csv	purplecircle	3	3	purple	circle	581	5	bad	G2	bad	G	5
20	3472168_26_Jul_2018_11_12_46.csv	purplestar	3	3	purple	star	582	5	good	G2	good	G	5
20	3472168_26_Jul_2018_11_12_46.csv	redcircle	0	3	red	circle	583	5	bad	B2	bad	B	5
20	3472168_26_Jul_2018_11_12_46.csv	redstar	0	3	red	star	584	5	good	B2	good	B	5
20	3472168_26_Jul_2018_11_12_46.csv	yellowcircle	3	3	yellow	circle	585	5	zed2	G1	zed	G	5
20	3472168_26_Jul_2018_11_12_46.csv	yellowcross	3	3	yellow	cross	586	5	bad	G1	bad	G	5
20	3472168_26_Jul_2018_11_12_46.csv	yellowstar	3	3	yellow	star	587	5	good	G1	good	G	5
20	3472168_26_Jul_2018_11_12_46.csv	yellowtriangle	3	3	yellow	triangle	588	5	zed1	G1	zed	G	5
20	4169792_23_Jul_2018_12_57_59.csv	bluecircle	0	3	blue	circle	817	5	zed2	B1	zed	B	4
20	4169792_23_Jul_2018_12_57_59.csv	bluecross	0	3	blue	cross	818	5	bad	B1	bad	B	4
20	4169792_23_Jul_2018_12_57_59.csv	bluestar	0	3	blue	star	819	5	good	B1	good	B	4
20	4169792_23_Jul_2018_12_57_59.csv	bluetriangle	0	3	blue	triangle	820	5	zed1	B1	zed	B	4
20	4169792_23_Jul_2018_12_57_59.csv	purplecircle	0	3	purple	circle	821	5	bad	G2	bad	G	4
20	4169792_23_Jul_2018_12_57_59.csv	purplestar	0	3	purple	star	822	5	good	G2	good	G	4
20	4169792_23_Jul_2018_12_57_59.csv	redcircle	0	3	red	circle	823	5	bad	B2	bad	B	4
20	4169792_23_Jul_2018_12_57_59.csv	redstar	0	3	red	star	824	5	good	B2	good	B	4
20	4169792_23_Jul_2018_12_57_59.csv	yellowcircle	3	3	yellow	circle	825	5	zed2	G1	zed	G	4
20	4169792_23_Jul_2018_12_57_59.csv	yellowcross	3	3	yellow	cross	826	5	bad	G1	bad	G	4
20	4169792_23_Jul_2018_12_57_59.csv	yellowstar	3	3	yellow	star	827	5	good	G1	good	G	4
20	4169792_23_Jul_2018_12_57_59.csv	yellowtriangle	3	3	yellow	triangle	828	5	zed1	G1	zed	G	4
20	5121335_01_Aug_2018_15_25_45.csv	bluecircle	0	3	blue	circle	1177	5	zed2	B1	zed	B	1
20	5121335_01_Aug_2018_15_25_45.csv	bluecross	0	3	blue	cross	1178	5	bad	B1	bad	B	1
20	5121335_01_Aug_2018_15_25_45.csv	bluestar	0	3	blue	star	1179	5	good	B1	good	B	1
20	5121335_01_Aug_2018_15_25_45.csv	bluetriangle	0	3	blue	triangle	1180	5	zed1	B1	zed	B	1
20	5121335_01_Aug_2018_15_25_45.csv	purplecircle	1	3	purple	circle	1181	5	bad	G2	bad	G	1
20	5121335_01_Aug_2018_15_25_45.csv	purplestar	3	3	purple	star	1182	5	good	G2	good	G	1
20	5121335_01_Aug_2018_15_25_45.csv	redcircle	0	3	red	circle	1183	5	bad	B2	bad	B	1
20	5121335_01_Aug_2018_15_25_45.csv	redstar	0	3	red	star	1184	5	good	B2	good	B	1
20	5121335_01_Aug_2018_15_25_45.csv	yellowcircle	1	3	yellow	circle	1185	5	zed2	G1	zed	G	1
20	5121335_01_Aug_2018_15_25_45.csv	yellowcross	0	3	yellow	cross	1186	5	bad	G1	bad	G	1
20	5121335_01_Aug_2018_15_25_45.csv	yellowstar	3	3	yellow	star	1187	5	good	G1	good	G	1
20	5121335_01_Aug_2018_15_25_45.csv	yellowtriangle	0	3	yellow	triangle	1188	5	zed1	G1	zed	G	1
20	5235166_19_Jul_2018_13_16_31.csv	bluecircle	0	3	blue	circle	1237	5	zed2	B1	zed	B	5
20	5235166_19_Jul_2018_13_16_31.csv	bluecross	0	3	blue	cross	1238	5	bad	B1	bad	B	5
20	5235166_19_Jul_2018_13_16_31.csv	bluestar	3	3	blue	star	1239	5	good	B1	good	B	5
20	5235166_19_Jul_2018_13_16_31.csv	bluetriangle	0	3	blue	triangle	1240	5	zed1	B1	zed	B	5
20	5235166_19_Jul_2018_13_16_31.csv	purplecircle	0	3	purple	circle	1241	5	bad	G2	bad	G	5
20	5235166_19_Jul_2018_13_16_31.csv	purplestar	3	3	purple	star	1242	5	good	G2	good	G	5
20	5235166_19_Jul_2018_13_16_31.csv	redcircle	3	3	red	circle	1243	5	bad	B2	bad	B	5
20	5235166_19_Jul_2018_13_16_31.csv	redstar	3	3	red	star	1244	5	good	B2	good	B	5
20	5235166_19_Jul_2018_13_16_31.csv	yellowcircle	0	3	yellow	circle	1245	5	zed2	G1	zed	G	5
20	5235166_19_Jul_2018_13_16_31.csv	yellowcross	3	3	yellow	cross	1246	5	bad	G1	bad	G	5
20	5235166_19_Jul_2018_13_16_31.csv	yellowstar	3	3	yellow	star	1247	5	good	G1	good	G	5
20	5235166_19_Jul_2018_13_16_31.csv	yellowtriangle	0	3	yellow	triangle	1248	5	zed1	G1	zed	G	5
20	5305787_02_Aug_2018_12_12_29.csv	bluecircle	0	3	blue	circle	1297	5	zed2	B1	zed	B	5
20	5305787_02_Aug_2018_12_12_29.csv	bluecross	0	3	blue	cross	1298	5	bad	B1	bad	B	5
20	5305787_02_Aug_2018_12_12_29.csv	bluestar	0	3	blue	star	1299	5	good	B1	good	B	5
20	5305787_02_Aug_2018_12_12_29.csv	bluetriangle	0	3	blue	triangle	1300	5	zed1	B1	zed	B	5
20	5305787_02_Aug_2018_12_12_29.csv	purplecircle	2	3	purple	circle	1301	5	bad	G2	bad	G	5
20	5305787_02_Aug_2018_12_12_29.csv	purplestar	3	3	purple	star	1302	5	good	G2	good	G	5
20	5305787_02_Aug_2018_12_12_29.csv	redcircle	0	3	red	circle	1303	5	bad	B2	bad	B	5
20	5305787_02_Aug_2018_12_12_29.csv	redstar	0	3	red	star	1304	5	good	B2	good	B	5
20	5305787_02_Aug_2018_12_12_29.csv	yellowcircle	0	3	yellow	circle	1305	5	zed2	G1	zed	G	5
20	5305787_02_Aug_2018_12_12_29.csv	yellowcross	0	3	yellow	cross	1306	5	bad	G1	bad	G	5
20	5305787_02_Aug_2018_12_12_29.csv	yellowstar	0	3	yellow	star	1307	5	good	G1	good	G	5
20	5305787_02_Aug_2018_12_12_29.csv	yellowtriangle	0	3	yellow	triangle	1308	5	zed1	G1	zed	G	5
20	5330634_23_Jul_2018_14_06_01.csv	bluecircle	0	3	blue	circle	1357	5	zed2	B1	zed	B	5
20	5330634_23_Jul_2018_14_06_01.csv	bluecross	0	3	blue	cross	1358	5	bad	B1	bad	B	5
20	5330634_23_Jul_2018_14_06_01.csv	bluestar	0	3	blue	star	1359	5	good	B1	good	B	5
20	5330634_23_Jul_2018_14_06_01.csv	bluetriangle	0	3	blue	triangle	1360	5	zed1	B1	zed	B	5
20	5330634_23_Jul_2018_14_06_01.csv	purplecircle	0	3	purple	circle	1361	5	bad	G2	bad	G	5
20	5330634_23_Jul_2018_14_06_01.csv	purplestar	0	3	purple	star	1362	5	good	G2	good	G	5
20	5330634_23_Jul_2018_14_06_01.csv	redcircle	0	3	red	circle	1363	5	bad	B2	bad	B	5
20	5330634_23_Jul_2018_14_06_01.csv	redstar	0	3	red	star	1364	5	good	B2	good	B	5
20	5330634_23_Jul_2018_14_06_01.csv	yellowcircle	3	3	yellow	circle	1365	5	zed2	G1	zed	G	5
20	5330634_23_Jul_2018_14_06_01.csv	yellowcross	3	3	yellow	cross	1366	5	bad	G1	bad	G	5
20	5330634_23_Jul_2018_14_06_01.csv	yellowstar	3	3	yellow	star	1367	5	good	G1	good	G	5
20	5330634_23_Jul_2018_14_06_01.csv	yellowtriangle	3	3	yellow	triangle	1368	5	zed1	G1	zed	G	5
20	7343055_01_Aug_2018_12_57_11.csv	bluecircle	0	3	blue	circle	1897	5	zed2	B1	zed	B	1
20	7343055_01_Aug_2018_12_57_11.csv	bluecross	0	3	blue	cross	1898	5	bad	B1	bad	B	1
20	7343055_01_Aug_2018_12_57_11.csv	bluestar	3	3	blue	star	1899	5	good	B1	good	B	1
20	7343055_01_Aug_2018_12_57_11.csv	bluetriangle	0	3	blue	triangle	1900	5	zed1	B1	zed	B	1
20	7343055_01_Aug_2018_12_57_11.csv	purplecircle	0	3	purple	circle	1901	5	bad	G2	bad	G	1
20	7343055_01_Aug_2018_12_57_11.csv	purplestar	3	3	purple	star	1902	5	good	G2	good	G	1
20	7343055_01_Aug_2018_12_57_11.csv	redcircle	0	3	red	circle	1903	5	bad	B2	bad	B	1
20	7343055_01_Aug_2018_12_57_11.csv	redstar	3	3	red	star	1904	5	good	B2	good	B	1
20	7343055_01_Aug_2018_12_57_11.csv	yellowcircle	0	3	yellow	circle	1905	5	zed2	G1	zed	G	1
20	7343055_01_Aug_2018_12_57_11.csv	yellowcross	0	3	yellow	cross	1906	5	bad	G1	bad	G	1
20	7343055_01_Aug_2018_12_57_11.csv	yellowstar	0	3	yellow	star	1907	5	good	G1	good	G	1
20	7343055_01_Aug_2018_12_57_11.csv	yellowtriangle	0	3	yellow	triangle	1908	5	zed1	G1	zed	G	1
20	8127934_31_Jul_2018_14_21_55.csv	bluecircle	2	3	blue	circle	2245	5	zed2	B1	zed	B	2
20	8127934_31_Jul_2018_14_21_55.csv	bluecross	1	3	blue	cross	2246	5	bad	B1	bad	B	2
20	8127934_31_Jul_2018_14_21_55.csv	bluestar	2	3	blue	star	2247	5	good	B1	good	B	2
20	8127934_31_Jul_2018_14_21_55.csv	bluetriangle	1	3	blue	triangle	2248	5	zed1	B1	zed	B	2
20	8127934_31_Jul_2018_14_21_55.csv	purplecircle	2	3	purple	circle	2249	5	bad	G2	bad	G	2
20	8127934_31_Jul_2018_14_21_55.csv	purplestar	2	3	purple	star	2250	5	good	G2	good	G	2
20	8127934_31_Jul_2018_14_21_55.csv	redcircle	2	3	red	circle	2251	5	bad	B2	bad	B	2
20	8127934_31_Jul_2018_14_21_55.csv	redstar	1	3	red	star	2252	5	good	B2	good	B	2
20	8127934_31_Jul_2018_14_21_55.csv	yellowcircle	2	3	yellow	circle	2253	5	zed2	G1	zed	G	2
20	8127934_31_Jul_2018_14_21_55.csv	yellowcross	1	3	yellow	cross	2254	5	bad	G1	bad	G	2
20	8127934_31_Jul_2018_14_21_55.csv	yellowstar	2	3	yellow	star	2255	5	good	G1	good	G	2
20	8127934_31_Jul_2018_14_21_55.csv	yellowtriangle	1	3	yellow	triangle	2256	5	zed1	G1	zed	G	2
20	9016068_24_Jul_2018_13_16_18.csv	bluecircle	0	3	blue	circle	2461	5	zed2	B1	zed	B	4
20	9016068_24_Jul_2018_13_16_18.csv	bluecross	0	3	blue	cross	2462	5	bad	B1	bad	B	4
20	9016068_24_Jul_2018_13_16_18.csv	bluestar	0	3	blue	star	2463	5	good	B1	good	B	4
20	9016068_24_Jul_2018_13_16_18.csv	bluetriangle	0	3	blue	triangle	2464	5	zed1	B1	zed	B	4
20	9016068_24_Jul_2018_13_16_18.csv	purplecircle	0	3	purple	circle	2465	5	bad	G2	bad	G	4
20	9016068_24_Jul_2018_13_16_18.csv	purplestar	0	3	purple	star	2466	5	good	G2	good	G	4
20	9016068_24_Jul_2018_13_16_18.csv	redcircle	0	3	red	circle	2467	5	bad	B2	bad	B	4
20	9016068_24_Jul_2018_13_16_18.csv	redstar	0	3	red	star	2468	5	good	B2	good	B	4
20	9016068_24_Jul_2018_13_16_18.csv	yellowcircle	3	3	yellow	circle	2469	5	zed2	G1	zed	G	4
20	9016068_24_Jul_2018_13_16_18.csv	yellowcross	3	3	yellow	cross	2470	5	bad	G1	bad	G	4
20	9016068_24_Jul_2018_13_16_18.csv	yellowstar	3	3	yellow	star	2471	5	good	G1	good	G	4
20	9016068_24_Jul_2018_13_16_18.csv	yellowtriangle	3	3	yellow	triangle	2472	5	zed1	G1	zed	G	4
20	9256005_31_Jul_2018_12_10_34.csv	bluecircle	0	3	blue	circle	2521	5	zed2	B1	zed	B	3
20	9256005_31_Jul_2018_12_10_34.csv	bluecross	0	3	blue	cross	2522	5	bad	B1	bad	B	3
20	9256005_31_Jul_2018_12_10_34.csv	bluestar	3	3	blue	star	2523	5	good	B1	good	B	3
20	9256005_31_Jul_2018_12_10_34.csv	bluetriangle	0	3	blue	triangle	2524	5	zed1	B1	zed	B	3
20	9256005_31_Jul_2018_12_10_34.csv	purplecircle	0	3	purple	circle	2525	5	bad	G2	bad	G	3
20	9256005_31_Jul_2018_12_10_34.csv	purplestar	3	3	purple	star	2526	5	good	G2	good	G	3
20	9256005_31_Jul_2018_12_10_34.csv	redcircle	0	3	red	circle	2527	5	bad	B2	bad	B	3
20	9256005_31_Jul_2018_12_10_34.csv	redstar	3	3	red	star	2528	5	good	B2	good	B	3
20	9256005_31_Jul_2018_12_10_34.csv	yellowcircle	0	3	yellow	circle	2529	5	zed2	G1	zed	G	3
20	9256005_31_Jul_2018_12_10_34.csv	yellowcross	0	3	yellow	cross	2530	5	bad	G1	bad	G	3
20	9256005_31_Jul_2018_12_10_34.csv	yellowstar	3	3	yellow	star	2531	5	good	G1	good	G	3
20	9256005_31_Jul_2018_12_10_34.csv	yellowtriangle	0	3	yellow	triangle	2532	5	zed1	G1	zed	G	3
3	120051_26_Jul_2018_14_24_41.csv	bluecircle	2	3	blue	circle	61	1	good	G1	good	G	1
3	120051_26_Jul_2018_14_24_41.csv	bluecross	3	3	blue	cross	62	1	zed2	G1	zed	G	1
3	120051_26_Jul_2018_14_24_41.csv	bluestar	3	3	blue	star	63	1	bad	G1	bad	G	1
3	120051_26_Jul_2018_14_24_41.csv	bluetriangle	3	3	blue	triangle	64	1	zed1	G1	zed	G	1
3	120051_26_Jul_2018_14_24_41.csv	purplecircle	0	3	purple	circle	65	1	good	Z2	good	Z	1
3	120051_26_Jul_2018_14_24_41.csv	purplestar	1	3	purple	star	66	1	bad	Z2	bad	Z	1
3	120051_26_Jul_2018_14_24_41.csv	redcircle	0	3	red	circle	67	1	good	Z1	good	Z	1
3	120051_26_Jul_2018_14_24_41.csv	redstar	2	3	red	star	68	1	bad	Z1	bad	Z	1
3	120051_26_Jul_2018_14_24_41.csv	yellowcircle	0	3	yellow	circle	69	1	good	B1	good	B	1
3	120051_26_Jul_2018_14_24_41.csv	yellowcross	0	3	yellow	cross	70	1	zed2	B1	zed	B	1
3	120051_26_Jul_2018_14_24_41.csv	yellowstar	2	3	yellow	star	71	1	bad	B1	bad	B	1
3	120051_26_Jul_2018_14_24_41.csv	yellowtriangle	0	3	yellow	triangle	72	1	zed1	B1	zed	B	1
3	321929_02_Aug_2018_16_40_29.csv	bluecircle	3	3	blue	circle	421	1	good	G1	good	G	1
3	321929_02_Aug_2018_16_40_29.csv	bluecross	3	3	blue	cross	422	1	zed2	G1	zed	G	1
3	321929_02_Aug_2018_16_40_29.csv	bluestar	3	3	blue	star	423	1	bad	G1	bad	G	1
3	321929_02_Aug_2018_16_40_29.csv	bluetriangle	3	3	blue	triangle	424	1	zed1	G1	zed	G	1
3	321929_02_Aug_2018_16_40_29.csv	purplecircle	3	3	purple	circle	425	1	good	Z2	good	Z	1
3	321929_02_Aug_2018_16_40_29.csv	purplestar	3	3	purple	star	426	1	bad	Z2	bad	Z	1
3	321929_02_Aug_2018_16_40_29.csv	redcircle	3	3	red	circle	427	1	good	Z1	good	Z	1
3	321929_02_Aug_2018_16_40_29.csv	redstar	3	3	red	star	428	1	bad	Z1	bad	Z	1
3	321929_02_Aug_2018_16_40_29.csv	yellowcircle	3	3	yellow	circle	429	1	good	B1	good	B	1
3	321929_02_Aug_2018_16_40_29.csv	yellowcross	3	3	yellow	cross	430	1	zed2	B1	zed	B	1
3	321929_02_Aug_2018_16_40_29.csv	yellowstar	3	3	yellow	star	431	1	bad	B1	bad	B	1
3	321929_02_Aug_2018_16_40_29.csv	yellowtriangle	3	3	yellow	triangle	432	1	zed1	B1	zed	B	1
3	328008_23_Jul_2018_12_01_23.csv	bluecircle	3	3	blue	circle	481	1	good	G1	good	G	3
3	328008_23_Jul_2018_12_01_23.csv	bluecross	3	3	blue	cross	482	1	zed2	G1	zed	G	3
3	328008_23_Jul_2018_12_01_23.csv	bluestar	3	3	blue	star	483	1	bad	G1	bad	G	3
3	328008_23_Jul_2018_12_01_23.csv	bluetriangle	3	3	blue	triangle	484	1	zed1	G1	zed	G	3
3	328008_23_Jul_2018_12_01_23.csv	purplecircle	0	3	purple	circle	485	1	good	Z2	good	Z	3
3	328008_23_Jul_2018_12_01_23.csv	purplestar	0	3	purple	star	486	1	bad	Z2	bad	Z	3
3	328008_23_Jul_2018_12_01_23.csv	redcircle	0	3	red	circle	487	1	good	Z1	good	Z	3
3	328008_23_Jul_2018_12_01_23.csv	redstar	0	3	red	star	488	1	bad	Z1	bad	Z	3
3	328008_23_Jul_2018_12_01_23.csv	yellowcircle	0	3	yellow	circle	489	1	good	B1	good	B	3
3	328008_23_Jul_2018_12_01_23.csv	yellowcross	0	3	yellow	cross	490	1	zed2	B1	zed	B	3
3	328008_23_Jul_2018_12_01_23.csv	yellowstar	0	3	yellow	star	491	1	bad	B1	bad	B	3
3	328008_23_Jul_2018_12_01_23.csv	yellowtriangle	0	3	yellow	triangle	492	1	zed1	B1	zed	B	3
3	3472168_26_Jul_2018_11_12_46.csv	bluecircle	3	3	blue	circle	529	1	good	G1	good	G	2
3	3472168_26_Jul_2018_11_12_46.csv	bluecross	3	3	blue	cross	530	1	zed2	G1	zed	G	2
3	3472168_26_Jul_2018_11_12_46.csv	bluestar	3	3	blue	star	531	1	bad	G1	bad	G	2
3	3472168_26_Jul_2018_11_12_46.csv	bluetriangle	3	3	blue	triangle	532	1	zed1	G1	zed	G	2
3	3472168_26_Jul_2018_11_12_46.csv	purplecircle	0	3	purple	circle	533	1	good	Z2	good	Z	2
3	3472168_26_Jul_2018_11_12_46.csv	purplestar	0	3	purple	star	534	1	bad	Z2	bad	Z	2
3	3472168_26_Jul_2018_11_12_46.csv	redcircle	0	3	red	circle	535	1	good	Z1	good	Z	2
3	3472168_26_Jul_2018_11_12_46.csv	redstar	0	3	red	star	536	1	bad	Z1	bad	Z	2
3	3472168_26_Jul_2018_11_12_46.csv	yellowcircle	0	3	yellow	circle	537	1	good	B1	good	B	2
3	3472168_26_Jul_2018_11_12_46.csv	yellowcross	0	3	yellow	cross	538	1	zed2	B1	zed	B	2
3	3472168_26_Jul_2018_11_12_46.csv	yellowstar	0	3	yellow	star	539	1	bad	B1	bad	B	2
3	3472168_26_Jul_2018_11_12_46.csv	yellowtriangle	0	3	yellow	triangle	540	1	zed1	B1	zed	B	2
3	3541439_19_Jul_2018_13_49_09.csv	bluecircle	3	3	blue	circle	589	1	good	G1	good	G	3
3	3541439_19_Jul_2018_13_49_09.csv	bluecross	0	3	blue	cross	590	1	zed2	G1	zed	G	3
3	3541439_19_Jul_2018_13_49_09.csv	bluestar	0	3	blue	star	591	1	bad	G1	bad	G	3
3	3541439_19_Jul_2018_13_49_09.csv	bluetriangle	0	3	blue	triangle	592	1	zed1	G1	zed	G	3
3	3541439_19_Jul_2018_13_49_09.csv	purplecircle	3	3	purple	circle	593	1	good	Z2	good	Z	3
3	3541439_19_Jul_2018_13_49_09.csv	purplestar	0	3	purple	star	594	1	bad	Z2	bad	Z	3
3	3541439_19_Jul_2018_13_49_09.csv	redcircle	3	3	red	circle	595	1	good	Z1	good	Z	3
3	3541439_19_Jul_2018_13_49_09.csv	redstar	0	3	red	star	596	1	bad	Z1	bad	Z	3
3	3541439_19_Jul_2018_13_49_09.csv	yellowcircle	3	3	yellow	circle	597	1	good	B1	good	B	3
3	3541439_19_Jul_2018_13_49_09.csv	yellowcross	0	3	yellow	cross	598	1	zed2	B1	zed	B	3
3	3541439_19_Jul_2018_13_49_09.csv	yellowstar	0	3	yellow	star	599	1	bad	B1	bad	B	3
3	3541439_19_Jul_2018_13_49_09.csv	yellowtriangle	2	3	yellow	triangle	600	1	zed1	B1	zed	B	3
3	4330361_24_Jul_2018_14_48_27.csv	bluecircle	3	3	blue	circle	829	1	good	G1	good	G	2
3	4330361_24_Jul_2018_14_48_27.csv	bluecross	0	3	blue	cross	830	1	zed2	G1	zed	G	2
3	4330361_24_Jul_2018_14_48_27.csv	bluestar	3	3	blue	star	831	1	bad	G1	bad	G	2
3	4330361_24_Jul_2018_14_48_27.csv	bluetriangle	0	3	blue	triangle	832	1	zed1	G1	zed	G	2
3	4330361_24_Jul_2018_14_48_27.csv	purplecircle	1	3	purple	circle	833	1	good	Z2	good	Z	2
3	4330361_24_Jul_2018_14_48_27.csv	purplestar	0	3	purple	star	834	1	bad	Z2	bad	Z	2
3	4330361_24_Jul_2018_14_48_27.csv	redcircle	1	3	red	circle	835	1	good	Z1	good	Z	2
3	4330361_24_Jul_2018_14_48_27.csv	redstar	1	3	red	star	836	1	bad	Z1	bad	Z	2
3	4330361_24_Jul_2018_14_48_27.csv	yellowcircle	0	3	yellow	circle	837	1	good	B1	good	B	2
3	4330361_24_Jul_2018_14_48_27.csv	yellowcross	0	3	yellow	cross	838	1	zed2	B1	zed	B	2
3	4330361_24_Jul_2018_14_48_27.csv	yellowstar	0	3	yellow	star	839	1	bad	B1	bad	B	2
3	4330361_24_Jul_2018_14_48_27.csv	yellowtriangle	0	3	yellow	triangle	840	1	zed1	B1	zed	B	2
3	4983982_30_Jul_2018_12_53_03.csv	bluecircle	3	3	blue	circle	1009	1	good	G1	good	G	4
3	4983982_30_Jul_2018_12_53_03.csv	bluecross	3	3	blue	cross	1010	1	zed2	G1	zed	G	4
3	4983982_30_Jul_2018_12_53_03.csv	bluestar	2	3	blue	star	1011	1	bad	G1	bad	G	4
3	4983982_30_Jul_2018_12_53_03.csv	bluetriangle	0	3	blue	triangle	1012	1	zed1	G1	zed	G	4
3	4983982_30_Jul_2018_12_53_03.csv	purplecircle	0	3	purple	circle	1013	1	good	Z2	good	Z	4
3	4983982_30_Jul_2018_12_53_03.csv	purplestar	0	3	purple	star	1014	1	bad	Z2	bad	Z	4
3	4983982_30_Jul_2018_12_53_03.csv	redcircle	0	3	red	circle	1015	1	good	Z1	good	Z	4
3	4983982_30_Jul_2018_12_53_03.csv	redstar	0	3	red	star	1016	1	bad	Z1	bad	Z	4
3	4983982_30_Jul_2018_12_53_03.csv	yellowcircle	0	3	yellow	circle	1017	1	good	B1	good	B	4
3	4983982_30_Jul_2018_12_53_03.csv	yellowcross	0	3	yellow	cross	1018	1	zed2	B1	zed	B	4
3	4983982_30_Jul_2018_12_53_03.csv	yellowstar	0	3	yellow	star	1019	1	bad	B1	bad	B	4
3	4983982_30_Jul_2018_12_53_03.csv	yellowtriangle	0	3	yellow	triangle	1020	1	zed1	B1	zed	B	4
3	6046641_24_Jul_2018_10_24_47.csv	bluecircle	3	3	blue	circle	1549	1	good	G1	good	G	2
3	6046641_24_Jul_2018_10_24_47.csv	bluecross	3	3	blue	cross	1550	1	zed2	G1	zed	G	2
3	6046641_24_Jul_2018_10_24_47.csv	bluestar	3	3	blue	star	1551	1	bad	G1	bad	G	2
3	6046641_24_Jul_2018_10_24_47.csv	bluetriangle	3	3	blue	triangle	1552	1	zed1	G1	zed	G	2
3	6046641_24_Jul_2018_10_24_47.csv	purplecircle	0	3	purple	circle	1553	1	good	Z2	good	Z	2
3	6046641_24_Jul_2018_10_24_47.csv	purplestar	0	3	purple	star	1554	1	bad	Z2	bad	Z	2
3	6046641_24_Jul_2018_10_24_47.csv	redcircle	0	3	red	circle	1555	1	good	Z1	good	Z	2
3	6046641_24_Jul_2018_10_24_47.csv	redstar	0	3	red	star	1556	1	bad	Z1	bad	Z	2
3	6046641_24_Jul_2018_10_24_47.csv	yellowcircle	0	3	yellow	circle	1557	1	good	B1	good	B	2
3	6046641_24_Jul_2018_10_24_47.csv	yellowcross	0	3	yellow	cross	1558	1	zed2	B1	zed	B	2
3	6046641_24_Jul_2018_10_24_47.csv	yellowstar	0	3	yellow	star	1559	1	bad	B1	bad	B	2
3	6046641_24_Jul_2018_10_24_47.csv	yellowtriangle	0	3	yellow	triangle	1560	1	zed1	B1	zed	B	2
3	662891_02_Aug_2018_14_48_13.csv	bluecircle	3	3	blue	circle	1729	1	good	G1	good	G	5
3	662891_02_Aug_2018_14_48_13.csv	bluecross	3	3	blue	cross	1730	1	zed2	G1	zed	G	5
3	662891_02_Aug_2018_14_48_13.csv	bluestar	0	3	blue	star	1731	1	bad	G1	bad	G	5
3	662891_02_Aug_2018_14_48_13.csv	bluetriangle	3	3	blue	triangle	1732	1	zed1	G1	zed	G	5
3	662891_02_Aug_2018_14_48_13.csv	purplecircle	3	3	purple	circle	1733	1	good	Z2	good	Z	5
3	662891_02_Aug_2018_14_48_13.csv	purplestar	3	3	purple	star	1734	1	bad	Z2	bad	Z	5
3	662891_02_Aug_2018_14_48_13.csv	redcircle	3	3	red	circle	1735	1	good	Z1	good	Z	5
3	662891_02_Aug_2018_14_48_13.csv	redstar	3	3	red	star	1736	1	bad	Z1	bad	Z	5
3	662891_02_Aug_2018_14_48_13.csv	yellowcircle	3	3	yellow	circle	1737	1	good	B1	good	B	5
3	662891_02_Aug_2018_14_48_13.csv	yellowcross	3	3	yellow	cross	1738	1	zed2	B1	zed	B	5
3	662891_02_Aug_2018_14_48_13.csv	yellowstar	3	3	yellow	star	1739	1	bad	B1	bad	B	5
3	662891_02_Aug_2018_14_48_13.csv	yellowtriangle	3	3	yellow	triangle	1740	1	zed1	B1	zed	B	5
3	7574009_31_Jul_2018_15_52_50.csv	bluecircle	0	3	blue	circle	2029	1	good	G1	good	G	2
3	7574009_31_Jul_2018_15_52_50.csv	bluecross	0	3	blue	cross	2030	1	zed2	G1	zed	G	2
3	7574009_31_Jul_2018_15_52_50.csv	bluestar	3	3	blue	star	2031	1	bad	G1	bad	G	2
3	7574009_31_Jul_2018_15_52_50.csv	bluetriangle	0	3	blue	triangle	2032	1	zed1	G1	zed	G	2
3	7574009_31_Jul_2018_15_52_50.csv	purplecircle	0	3	purple	circle	2033	1	good	Z2	good	Z	2
3	7574009_31_Jul_2018_15_52_50.csv	purplestar	3	3	purple	star	2034	1	bad	Z2	bad	Z	2
3	7574009_31_Jul_2018_15_52_50.csv	redcircle	0	3	red	circle	2035	1	good	Z1	good	Z	2
3	7574009_31_Jul_2018_15_52_50.csv	redstar	0	3	red	star	2036	1	bad	Z1	bad	Z	2
3	7574009_31_Jul_2018_15_52_50.csv	yellowcircle	0	3	yellow	circle	2037	1	good	B1	good	B	2
3	7574009_31_Jul_2018_15_52_50.csv	yellowcross	0	3	yellow	cross	2038	1	zed2	B1	zed	B	2
3	7574009_31_Jul_2018_15_52_50.csv	yellowstar	0	3	yellow	star	2039	1	bad	B1	bad	B	2
3	7574009_31_Jul_2018_15_52_50.csv	yellowtriangle	0	3	yellow	triangle	2040	1	zed1	B1	zed	B	2
3	7713374_31_Jul_2018_11_47_46.csv	bluecircle	3	3	blue	circle	2149	1	good	G1	good	G	4
3	7713374_31_Jul_2018_11_47_46.csv	bluecross	0	3	blue	cross	2150	1	zed2	G1	zed	G	4
3	7713374_31_Jul_2018_11_47_46.csv	bluestar	0	3	blue	star	2151	1	bad	G1	bad	G	4
3	7713374_31_Jul_2018_11_47_46.csv	bluetriangle	0	3	blue	triangle	2152	1	zed1	G1	zed	G	4
3	7713374_31_Jul_2018_11_47_46.csv	purplecircle	2	3	purple	circle	2153	1	good	Z2	good	Z	4
3	7713374_31_Jul_2018_11_47_46.csv	purplestar	0	3	purple	star	2154	1	bad	Z2	bad	Z	4
3	7713374_31_Jul_2018_11_47_46.csv	redcircle	0	3	red	circle	2155	1	good	Z1	good	Z	4
3	7713374_31_Jul_2018_11_47_46.csv	redstar	0	3	red	star	2156	1	bad	Z1	bad	Z	4
3	7713374_31_Jul_2018_11_47_46.csv	yellowcircle	0	3	yellow	circle	2157	1	good	B1	good	B	4
3	7713374_31_Jul_2018_11_47_46.csv	yellowcross	0	3	yellow	cross	2158	1	zed2	B1	zed	B	4
3	7713374_31_Jul_2018_11_47_46.csv	yellowstar	0	3	yellow	star	2159	1	bad	B1	bad	B	4
3	7713374_31_Jul_2018_11_47_46.csv	yellowtriangle	0	3	yellow	triangle	2160	1	zed1	B1	zed	B	4
3	8127934_31_Jul_2018_14_21_55.csv	bluecircle	1	3	blue	circle	2197	1	good	G1	good	G	5
3	8127934_31_Jul_2018_14_21_55.csv	bluecross	1	3	blue	cross	2198	1	zed2	G1	zed	G	5
3	8127934_31_Jul_2018_14_21_55.csv	bluestar	1	3	blue	star	2199	1	bad	G1	bad	G	5
3	8127934_31_Jul_2018_14_21_55.csv	bluetriangle	2	3	blue	triangle	2200	1	zed1	G1	zed	G	5
3	8127934_31_Jul_2018_14_21_55.csv	purplecircle	1	3	purple	circle	2201	1	good	Z2	good	Z	5
3	8127934_31_Jul_2018_14_21_55.csv	purplestar	1	3	purple	star	2202	1	bad	Z2	bad	Z	5
3	8127934_31_Jul_2018_14_21_55.csv	redcircle	1	3	red	circle	2203	1	good	Z1	good	Z	5
3	8127934_31_Jul_2018_14_21_55.csv	redstar	0	3	red	star	2204	1	bad	Z1	bad	Z	5
3	8127934_31_Jul_2018_14_21_55.csv	yellowcircle	1	3	yellow	circle	2205	1	good	B1	good	B	5
3	8127934_31_Jul_2018_14_21_55.csv	yellowcross	1	3	yellow	cross	2206	1	zed2	B1	zed	B	5
3	8127934_31_Jul_2018_14_21_55.csv	yellowstar	2	3	yellow	star	2207	1	bad	B1	bad	B	5
3	8127934_31_Jul_2018_14_21_55.csv	yellowtriangle	1	3	yellow	triangle	2208	1	zed1	B1	zed	B	5
4	1548495_02_Aug_2018_11_26_27.csv	bluecircle	3	3	blue	circle	121	1	zed2	B1	zed	B	2
4	1548495_02_Aug_2018_11_26_27.csv	bluecross	0	3	blue	cross	122	1	bad	B1	bad	B	2
4	1548495_02_Aug_2018_11_26_27.csv	bluestar	0	3	blue	star	123	1	good	B1	good	B	2
4	1548495_02_Aug_2018_11_26_27.csv	bluetriangle	0	3	blue	triangle	124	1	zed1	B1	zed	B	2
4	1548495_02_Aug_2018_11_26_27.csv	purplecircle	0	3	purple	circle	125	1	bad	Z1	bad	Z	2
4	1548495_02_Aug_2018_11_26_27.csv	purplestar	0	3	purple	star	126	1	good	Z1	good	Z	2
4	1548495_02_Aug_2018_11_26_27.csv	redcircle	0	3	red	circle	127	1	bad	Z2	bad	Z	2
4	1548495_02_Aug_2018_11_26_27.csv	redstar	0	3	red	star	128	1	good	Z2	good	Z	2
4	1548495_02_Aug_2018_11_26_27.csv	yellowcircle	3	3	yellow	circle	129	1	zed2	G1	zed	G	2
4	1548495_02_Aug_2018_11_26_27.csv	yellowcross	3	3	yellow	cross	130	1	bad	G1	bad	G	2
4	1548495_02_Aug_2018_11_26_27.csv	yellowstar	3	3	yellow	star	131	1	good	G1	good	G	2
4	1548495_02_Aug_2018_11_26_27.csv	yellowtriangle	3	3	yellow	triangle	132	1	zed1	G1	zed	G	2
4	266171_24_Jul_2018_18_31_40.csv	bluecircle	1	3	blue	circle	301	1	zed2	B1	zed	B	5
4	266171_24_Jul_2018_18_31_40.csv	bluecross	0	3	blue	cross	302	1	bad	B1	bad	B	5
4	266171_24_Jul_2018_18_31_40.csv	bluestar	0	3	blue	star	303	1	good	B1	good	B	5
4	266171_24_Jul_2018_18_31_40.csv	bluetriangle	0	3	blue	triangle	304	1	zed1	B1	zed	B	5
4	266171_24_Jul_2018_18_31_40.csv	purplecircle	0	3	purple	circle	305	1	bad	Z1	bad	Z	5
4	266171_24_Jul_2018_18_31_40.csv	purplestar	0	3	purple	star	306	1	good	Z1	good	Z	5
4	266171_24_Jul_2018_18_31_40.csv	redcircle	0	3	red	circle	307	1	bad	Z2	bad	Z	5
4	266171_24_Jul_2018_18_31_40.csv	redstar	0	3	red	star	308	1	good	Z2	good	Z	5
4	266171_24_Jul_2018_18_31_40.csv	yellowcircle	3	3	yellow	circle	309	1	zed2	G1	zed	G	5
4	266171_24_Jul_2018_18_31_40.csv	yellowcross	3	3	yellow	cross	310	1	bad	G1	bad	G	5
4	266171_24_Jul_2018_18_31_40.csv	yellowstar	3	3	yellow	star	311	1	good	G1	good	G	5
4	266171_24_Jul_2018_18_31_40.csv	yellowtriangle	3	3	yellow	triangle	312	1	zed1	G1	zed	G	5
4	4169792_23_Jul_2018_12_57_59.csv	bluecircle	0	3	blue	circle	769	1	zed2	B1	zed	B	2
4	4169792_23_Jul_2018_12_57_59.csv	bluecross	0	3	blue	cross	770	1	bad	B1	bad	B	2
4	4169792_23_Jul_2018_12_57_59.csv	bluestar	0	3	blue	star	771	1	good	B1	good	B	2
4	4169792_23_Jul_2018_12_57_59.csv	bluetriangle	0	3	blue	triangle	772	1	zed1	B1	zed	B	2
4	4169792_23_Jul_2018_12_57_59.csv	purplecircle	0	3	purple	circle	773	1	bad	Z1	bad	Z	2
4	4169792_23_Jul_2018_12_57_59.csv	purplestar	0	3	purple	star	774	1	good	Z1	good	Z	2
4	4169792_23_Jul_2018_12_57_59.csv	redcircle	0	3	red	circle	775	1	bad	Z2	bad	Z	2
4	4169792_23_Jul_2018_12_57_59.csv	redstar	0	3	red	star	776	1	good	Z2	good	Z	2
4	4169792_23_Jul_2018_12_57_59.csv	yellowcircle	3	3	yellow	circle	777	1	zed2	G1	zed	G	2
4	4169792_23_Jul_2018_12_57_59.csv	yellowcross	3	3	yellow	cross	778	1	bad	G1	bad	G	2
4	4169792_23_Jul_2018_12_57_59.csv	yellowstar	3	3	yellow	star	779	1	good	G1	good	G	2
4	4169792_23_Jul_2018_12_57_59.csv	yellowtriangle	3	3	yellow	triangle	780	1	zed1	G1	zed	G	2
4	4331854_24_Jul_2018_10_56_21.csv	bluecircle	0	3	blue	circle	889	1	zed2	B1	zed	B	1
4	4331854_24_Jul_2018_10_56_21.csv	bluecross	0	3	blue	cross	890	1	bad	B1	bad	B	1
4	4331854_24_Jul_2018_10_56_21.csv	bluestar	0	3	blue	star	891	1	good	B1	good	B	1
4	4331854_24_Jul_2018_10_56_21.csv	bluetriangle	0	3	blue	triangle	892	1	zed1	B1	zed	B	1
4	4331854_24_Jul_2018_10_56_21.csv	purplecircle	0	3	purple	circle	893	1	bad	Z1	bad	Z	1
4	4331854_24_Jul_2018_10_56_21.csv	purplestar	0	3	purple	star	894	1	good	Z1	good	Z	1
4	4331854_24_Jul_2018_10_56_21.csv	redcircle	0	3	red	circle	895	1	bad	Z2	bad	Z	1
4	4331854_24_Jul_2018_10_56_21.csv	redstar	0	3	red	star	896	1	good	Z2	good	Z	1
4	4331854_24_Jul_2018_10_56_21.csv	yellowcircle	3	3	yellow	circle	897	1	zed2	G1	zed	G	1
4	4331854_24_Jul_2018_10_56_21.csv	yellowcross	3	3	yellow	cross	898	1	bad	G1	bad	G	1
4	4331854_24_Jul_2018_10_56_21.csv	yellowstar	3	3	yellow	star	899	1	good	G1	good	G	1
4	4331854_24_Jul_2018_10_56_21.csv	yellowtriangle	3	3	yellow	triangle	900	1	zed1	G1	zed	G	1
4	4539653_19_Jul_2018_11_46_30.csv	bluecircle	0	3	blue	circle	949	1	zed2	B1	zed	B	2
4	4539653_19_Jul_2018_11_46_30.csv	bluecross	0	3	blue	cross	950	1	bad	B1	bad	B	2
4	4539653_19_Jul_2018_11_46_30.csv	bluestar	0	3	blue	star	951	1	good	B1	good	B	2
4	4539653_19_Jul_2018_11_46_30.csv	bluetriangle	0	3	blue	triangle	952	1	zed1	B1	zed	B	2
4	4539653_19_Jul_2018_11_46_30.csv	purplecircle	0	3	purple	circle	953	1	bad	Z1	bad	Z	2
4	4539653_19_Jul_2018_11_46_30.csv	purplestar	0	3	purple	star	954	1	good	Z1	good	Z	2
4	4539653_19_Jul_2018_11_46_30.csv	redcircle	0	3	red	circle	955	1	bad	Z2	bad	Z	2
4	4539653_19_Jul_2018_11_46_30.csv	redstar	0	3	red	star	956	1	good	Z2	good	Z	2
4	4539653_19_Jul_2018_11_46_30.csv	yellowcircle	3	3	yellow	circle	957	1	zed2	G1	zed	G	2
4	4539653_19_Jul_2018_11_46_30.csv	yellowcross	3	3	yellow	cross	958	1	bad	G1	bad	G	2
4	4539653_19_Jul_2018_11_46_30.csv	yellowstar	3	3	yellow	star	959	1	good	G1	good	G	2
4	4539653_19_Jul_2018_11_46_30.csv	yellowtriangle	3	3	yellow	triangle	960	1	zed1	G1	zed	G	2
4	5305787_02_Aug_2018_12_12_29.csv	bluecircle	0	3	blue	circle	1249	1	zed2	B1	zed	B	1
4	5305787_02_Aug_2018_12_12_29.csv	bluecross	0	3	blue	cross	1250	1	bad	B1	bad	B	1
4	5305787_02_Aug_2018_12_12_29.csv	bluestar	0	3	blue	star	1251	1	good	B1	good	B	1
4	5305787_02_Aug_2018_12_12_29.csv	bluetriangle	0	3	blue	triangle	1252	1	zed1	B1	zed	B	1
4	5305787_02_Aug_2018_12_12_29.csv	purplecircle	0	3	purple	circle	1253	1	bad	Z1	bad	Z	1
4	5305787_02_Aug_2018_12_12_29.csv	purplestar	0	3	purple	star	1254	1	good	Z1	good	Z	1
4	5305787_02_Aug_2018_12_12_29.csv	redcircle	0	3	red	circle	1255	1	bad	Z2	bad	Z	1
4	5305787_02_Aug_2018_12_12_29.csv	redstar	0	3	red	star	1256	1	good	Z2	good	Z	1
4	5305787_02_Aug_2018_12_12_29.csv	yellowcircle	3	3	yellow	circle	1257	1	zed2	G1	zed	G	1
4	5305787_02_Aug_2018_12_12_29.csv	yellowcross	0	3	yellow	cross	1258	1	bad	G1	bad	G	1
4	5305787_02_Aug_2018_12_12_29.csv	yellowstar	3	3	yellow	star	1259	1	good	G1	good	G	1
4	5305787_02_Aug_2018_12_12_29.csv	yellowtriangle	2	3	yellow	triangle	1260	1	zed1	G1	zed	G	1
4	6002854_26_Jul_2018_11_22_36.csv	bluecircle	0	3	blue	circle	1489	1	zed2	B1	zed	B	4
4	6002854_26_Jul_2018_11_22_36.csv	bluecross	1	3	blue	cross	1490	1	bad	B1	bad	B	4
4	6002854_26_Jul_2018_11_22_36.csv	bluestar	0	3	blue	star	1491	1	good	B1	good	B	4
4	6002854_26_Jul_2018_11_22_36.csv	bluetriangle	0	3	blue	triangle	1492	1	zed1	B1	zed	B	4
4	6002854_26_Jul_2018_11_22_36.csv	purplecircle	0	3	purple	circle	1493	1	bad	Z1	bad	Z	4
4	6002854_26_Jul_2018_11_22_36.csv	purplestar	0	3	purple	star	1494	1	good	Z1	good	Z	4
4	6002854_26_Jul_2018_11_22_36.csv	redcircle	0	3	red	circle	1495	1	bad	Z2	bad	Z	4
4	6002854_26_Jul_2018_11_22_36.csv	redstar	0	3	red	star	1496	1	good	Z2	good	Z	4
4	6002854_26_Jul_2018_11_22_36.csv	yellowcircle	3	3	yellow	circle	1497	1	zed2	G1	zed	G	4
4	6002854_26_Jul_2018_11_22_36.csv	yellowcross	3	3	yellow	cross	1498	1	bad	G1	bad	G	4
4	6002854_26_Jul_2018_11_22_36.csv	yellowstar	3	3	yellow	star	1499	1	good	G1	good	G	4
4	6002854_26_Jul_2018_11_22_36.csv	yellowtriangle	3	3	yellow	triangle	1500	1	zed1	G1	zed	G	4
4	6276180_01_Aug_2018_13_35_31.csv	bluecircle	1	3	blue	circle	1609	1	zed2	B1	zed	B	2
4	6276180_01_Aug_2018_13_35_31.csv	bluecross	2	3	blue	cross	1610	1	bad	B1	bad	B	2
4	6276180_01_Aug_2018_13_35_31.csv	bluestar	1	3	blue	star	1611	1	good	B1	good	B	2
4	6276180_01_Aug_2018_13_35_31.csv	bluetriangle	1	3	blue	triangle	1612	1	zed1	B1	zed	B	2
4	6276180_01_Aug_2018_13_35_31.csv	purplecircle	1	3	purple	circle	1613	1	bad	Z1	bad	Z	2
4	6276180_01_Aug_2018_13_35_31.csv	purplestar	0	3	purple	star	1614	1	good	Z1	good	Z	2
4	6276180_01_Aug_2018_13_35_31.csv	redcircle	3	3	red	circle	1615	1	bad	Z2	bad	Z	2
4	6276180_01_Aug_2018_13_35_31.csv	redstar	0	3	red	star	1616	1	good	Z2	good	Z	2
4	6276180_01_Aug_2018_13_35_31.csv	yellowcircle	0	3	yellow	circle	1617	1	zed2	G1	zed	G	2
4	6276180_01_Aug_2018_13_35_31.csv	yellowcross	0	3	yellow	cross	1618	1	bad	G1	bad	G	2
4	6276180_01_Aug_2018_13_35_31.csv	yellowstar	0	3	yellow	star	1619	1	good	G1	good	G	2
4	6276180_01_Aug_2018_13_35_31.csv	yellowtriangle	0	3	yellow	triangle	1620	1	zed1	G1	zed	G	2
4	7570864_01_Aug_2018_11_31_15.csv	bluecircle	0	3	blue	circle	1969	1	zed2	B1	zed	B	4
4	7570864_01_Aug_2018_11_31_15.csv	bluecross	0	3	blue	cross	1970	1	bad	B1	bad	B	4
4	7570864_01_Aug_2018_11_31_15.csv	bluestar	0	3	blue	star	1971	1	good	B1	good	B	4
4	7570864_01_Aug_2018_11_31_15.csv	bluetriangle	0	3	blue	triangle	1972	1	zed1	B1	zed	B	4
4	7570864_01_Aug_2018_11_31_15.csv	purplecircle	0	3	purple	circle	1973	1	bad	Z1	bad	Z	4
4	7570864_01_Aug_2018_11_31_15.csv	purplestar	0	3	purple	star	1974	1	good	Z1	good	Z	4
4	7570864_01_Aug_2018_11_31_15.csv	redcircle	0	3	red	circle	1975	1	bad	Z2	bad	Z	4
4	7570864_01_Aug_2018_11_31_15.csv	redstar	0	3	red	star	1976	1	good	Z2	good	Z	4
4	7570864_01_Aug_2018_11_31_15.csv	yellowcircle	3	3	yellow	circle	1977	1	zed2	G1	zed	G	4
4	7570864_01_Aug_2018_11_31_15.csv	yellowcross	3	3	yellow	cross	1978	1	bad	G1	bad	G	4
4	7570864_01_Aug_2018_11_31_15.csv	yellowstar	3	3	yellow	star	1979	1	good	G1	good	G	4
4	7570864_01_Aug_2018_11_31_15.csv	yellowtriangle	3	3	yellow	triangle	1980	1	zed1	G1	zed	G	4
4	8621936_30_Jul_2018_14_14_23.csv	bluecircle	0	3	blue	circle	2293	1	zed2	B1	zed	B	3
4	8621936_30_Jul_2018_14_14_23.csv	bluecross	0	3	blue	cross	2294	1	bad	B1	bad	B	3
4	8621936_30_Jul_2018_14_14_23.csv	bluestar	0	3	blue	star	2295	1	good	B1	good	B	3
4	8621936_30_Jul_2018_14_14_23.csv	bluetriangle	0	3	blue	triangle	2296	1	zed1	B1	zed	B	3
4	8621936_30_Jul_2018_14_14_23.csv	purplecircle	0	3	purple	circle	2297	1	bad	Z1	bad	Z	3
4	8621936_30_Jul_2018_14_14_23.csv	purplestar	0	3	purple	star	2298	1	good	Z1	good	Z	3
4	8621936_30_Jul_2018_14_14_23.csv	redcircle	0	3	red	circle	2299	1	bad	Z2	bad	Z	3
4	8621936_30_Jul_2018_14_14_23.csv	redstar	0	3	red	star	2300	1	good	Z2	good	Z	3
4	8621936_30_Jul_2018_14_14_23.csv	yellowcircle	3	3	yellow	circle	2301	1	zed2	G1	zed	G	3
4	8621936_30_Jul_2018_14_14_23.csv	yellowcross	3	3	yellow	cross	2302	1	bad	G1	bad	G	3
4	8621936_30_Jul_2018_14_14_23.csv	yellowstar	3	3	yellow	star	2303	1	good	G1	good	G	3
4	8621936_30_Jul_2018_14_14_23.csv	yellowtriangle	3	3	yellow	triangle	2304	1	zed1	G1	zed	G	3
4	936681_23_Jul_2018_13_23_59.csv	bluecircle	0	3	blue	circle	2533	1	zed2	B1	zed	B	5
4	936681_23_Jul_2018_13_23_59.csv	bluecross	0	3	blue	cross	2534	1	bad	B1	bad	B	5
4	936681_23_Jul_2018_13_23_59.csv	bluestar	0	3	blue	star	2535	1	good	B1	good	B	5
4	936681_23_Jul_2018_13_23_59.csv	bluetriangle	0	3	blue	triangle	2536	1	zed1	B1	zed	B	5
4	936681_23_Jul_2018_13_23_59.csv	purplecircle	3	3	purple	circle	2537	1	bad	Z1	bad	Z	5
4	936681_23_Jul_2018_13_23_59.csv	purplestar	3	3	purple	star	2538	1	good	Z1	good	Z	5
4	936681_23_Jul_2018_13_23_59.csv	redcircle	0	3	red	circle	2539	1	bad	Z2	bad	Z	5
4	936681_23_Jul_2018_13_23_59.csv	redstar	0	3	red	star	2540	1	good	Z2	good	Z	5
4	936681_23_Jul_2018_13_23_59.csv	yellowcircle	3	3	yellow	circle	2541	1	zed2	G1	zed	G	5
4	936681_23_Jul_2018_13_23_59.csv	yellowcross	0	3	yellow	cross	2542	1	bad	G1	bad	G	5
4	936681_23_Jul_2018_13_23_59.csv	yellowstar	3	3	yellow	star	2543	1	good	G1	good	G	5
4	936681_23_Jul_2018_13_23_59.csv	yellowtriangle	0	3	yellow	triangle	2544	1	zed1	G1	zed	G	5
5	266171_24_Jul_2018_18_31_40.csv	bluecircle	3	3	blue	circle	313	2	good	G1	good	G	4
5	266171_24_Jul_2018_18_31_40.csv	bluecross	0	3	blue	cross	314	2	good	G2	good	G	4
5	266171_24_Jul_2018_18_31_40.csv	bluestar	0	3	blue	star	315	2	good	B1	good	B	4
5	266171_24_Jul_2018_18_31_40.csv	bluetriangle	0	3	blue	triangle	316	2	good	B2	good	B	4
5	266171_24_Jul_2018_18_31_40.csv	purplecircle	3	3	purple	circle	317	2	zed1	G1	zed	G	4
5	266171_24_Jul_2018_18_31_40.csv	purplestar	0	3	purple	star	318	2	zed1	B1	zed	B	4
5	266171_24_Jul_2018_18_31_40.csv	redcircle	3	3	red	circle	319	2	zed2	G1	zed	G	4
5	266171_24_Jul_2018_18_31_40.csv	redstar	0	3	red	star	320	2	zed2	B1	zed	B	4
5	266171_24_Jul_2018_18_31_40.csv	yellowcircle	3	3	yellow	circle	321	2	bad	G1	bad	G	4
5	266171_24_Jul_2018_18_31_40.csv	yellowcross	0	3	yellow	cross	322	2	bad	G2	bad	G	4
5	266171_24_Jul_2018_18_31_40.csv	yellowstar	0	3	yellow	star	323	2	bad	B1	bad	B	4
5	266171_24_Jul_2018_18_31_40.csv	yellowtriangle	0	3	yellow	triangle	324	2	bad	B2	bad	B	4
5	2987451_19_Jul_2018_12_23_35.csv	bluecircle	2	3	blue	circle	373	2	good	G1	good	G	2
5	2987451_19_Jul_2018_12_23_35.csv	bluecross	3	3	blue	cross	374	2	good	G2	good	G	2
5	2987451_19_Jul_2018_12_23_35.csv	bluestar	0	3	blue	star	375	2	good	B1	good	B	2
5	2987451_19_Jul_2018_12_23_35.csv	bluetriangle	0	3	blue	triangle	376	2	good	B2	good	B	2
5	2987451_19_Jul_2018_12_23_35.csv	purplecircle	3	3	purple	circle	377	2	zed1	G1	zed	G	2
5	2987451_19_Jul_2018_12_23_35.csv	purplestar	0	3	purple	star	378	2	zed1	B1	zed	B	2
5	2987451_19_Jul_2018_12_23_35.csv	redcircle	2	3	red	circle	379	2	zed2	G1	zed	G	2
5	2987451_19_Jul_2018_12_23_35.csv	redstar	0	3	red	star	380	2	zed2	B1	zed	B	2
5	2987451_19_Jul_2018_12_23_35.csv	yellowcircle	0	3	yellow	circle	381	2	bad	G1	bad	G	2
5	2987451_19_Jul_2018_12_23_35.csv	yellowcross	3	3	yellow	cross	382	2	bad	G2	bad	G	2
5	2987451_19_Jul_2018_12_23_35.csv	yellowstar	0	3	yellow	star	383	2	bad	B1	bad	B	2
5	2987451_19_Jul_2018_12_23_35.csv	yellowtriangle	0	3	yellow	triangle	384	2	bad	B2	bad	B	2
5	328008_23_Jul_2018_12_01_23.csv	bluecircle	3	3	blue	circle	493	2	good	G1	good	G	1
5	328008_23_Jul_2018_12_01_23.csv	bluecross	3	3	blue	cross	494	2	good	G2	good	G	1
5	328008_23_Jul_2018_12_01_23.csv	bluestar	0	3	blue	star	495	2	good	B1	good	B	1
5	328008_23_Jul_2018_12_01_23.csv	bluetriangle	0	3	blue	triangle	496	2	good	B2	good	B	1
5	328008_23_Jul_2018_12_01_23.csv	purplecircle	0	3	purple	circle	497	2	zed1	G1	zed	G	1
5	328008_23_Jul_2018_12_01_23.csv	purplestar	0	3	purple	star	498	2	zed1	B1	zed	B	1
5	328008_23_Jul_2018_12_01_23.csv	redcircle	0	3	red	circle	499	2	zed2	G1	zed	G	1
5	328008_23_Jul_2018_12_01_23.csv	redstar	0	3	red	star	500	2	zed2	B1	zed	B	1
5	328008_23_Jul_2018_12_01_23.csv	yellowcircle	0	3	yellow	circle	501	2	bad	G1	bad	G	1
5	328008_23_Jul_2018_12_01_23.csv	yellowcross	0	3	yellow	cross	502	2	bad	G2	bad	G	1
5	328008_23_Jul_2018_12_01_23.csv	yellowstar	0	3	yellow	star	503	2	bad	B1	bad	B	1
5	328008_23_Jul_2018_12_01_23.csv	yellowtriangle	0	3	yellow	triangle	504	2	bad	B2	bad	B	1
5	3541439_19_Jul_2018_13_49_09.csv	bluecircle	3	3	blue	circle	601	2	good	G1	good	G	5
5	3541439_19_Jul_2018_13_49_09.csv	bluecross	3	3	blue	cross	602	2	good	G2	good	G	5
5	3541439_19_Jul_2018_13_49_09.csv	bluestar	0	3	blue	star	603	2	good	B1	good	B	5
5	3541439_19_Jul_2018_13_49_09.csv	bluetriangle	3	3	blue	triangle	604	2	good	B2	good	B	5
5	3541439_19_Jul_2018_13_49_09.csv	purplecircle	0	3	purple	circle	605	2	zed1	G1	zed	G	5
5	3541439_19_Jul_2018_13_49_09.csv	purplestar	0	3	purple	star	606	2	zed1	B1	zed	B	5
5	3541439_19_Jul_2018_13_49_09.csv	redcircle	0	3	red	circle	607	2	zed2	G1	zed	G	5
[truncated: 653 more rows]
