# Supplementary figures and images for: Signal categorization by foraging animals depends on ecological diversity
Source: eLife journal article supplement (doi:10.7554/elife.43965), 2019-04-25

# Experiment

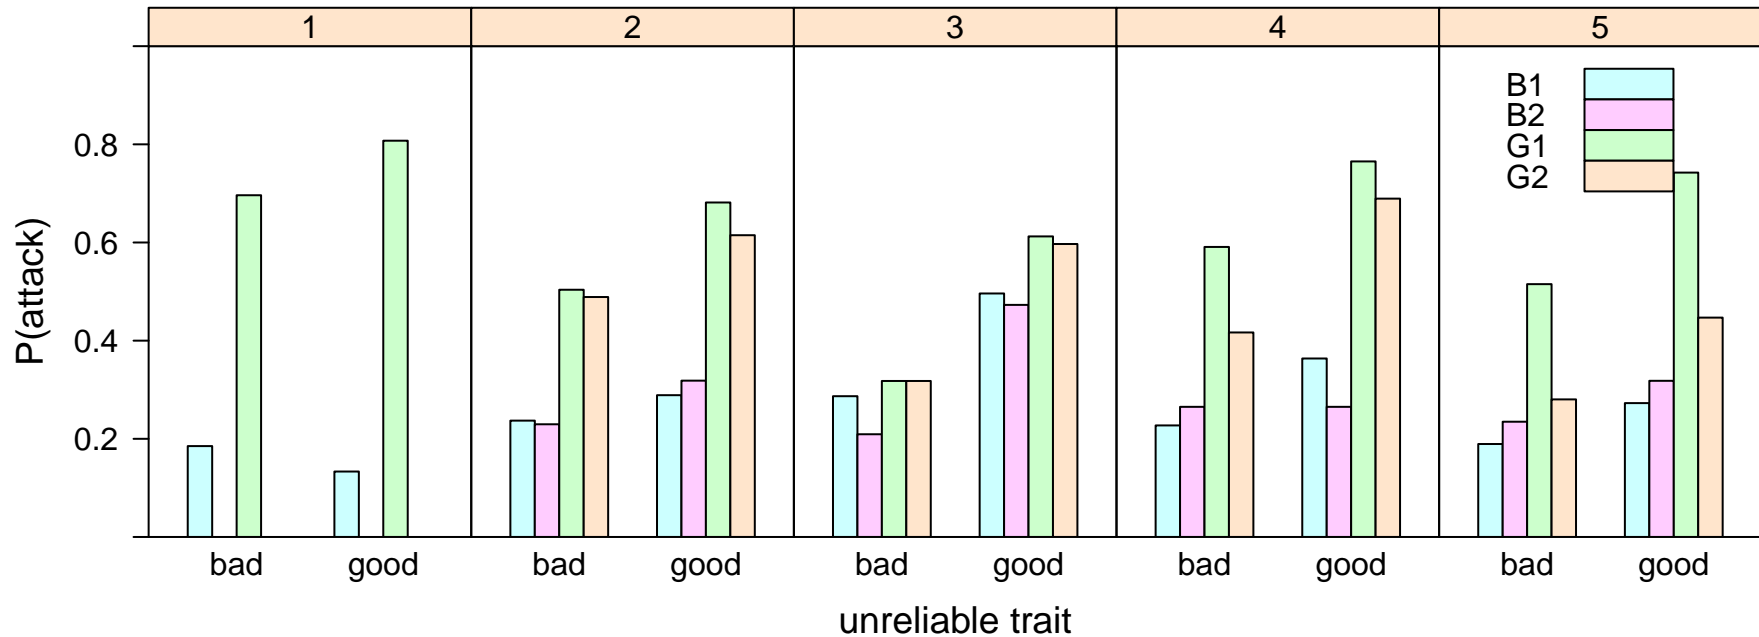

Supplement: supp [file elife-43965-supp-v1.zip › elife_poa_e43965_Figure_1_figure_supplement_2.pdf]

# Experiment

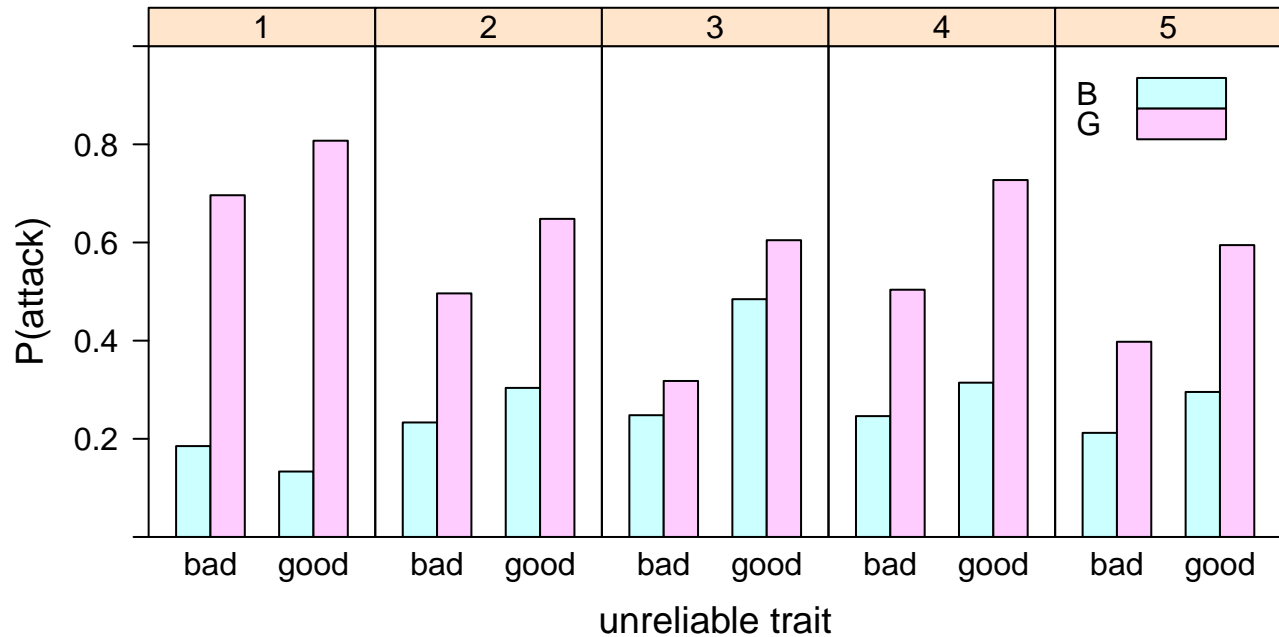

Supplement: supp [file elife-43965-supp-v1.zip › elife_poa_e43965_Figure_1_figure_supplement_1.pdf]

Experiment 1

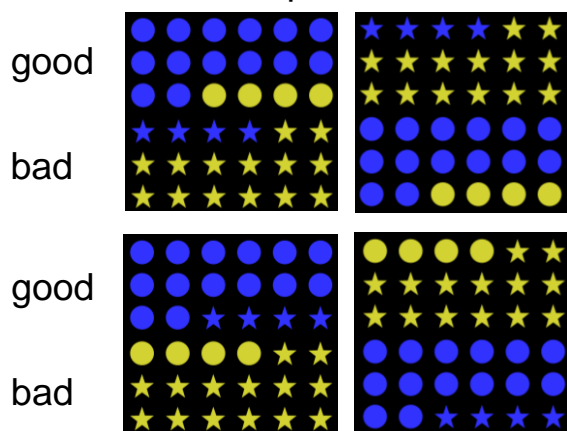

Experiment 4

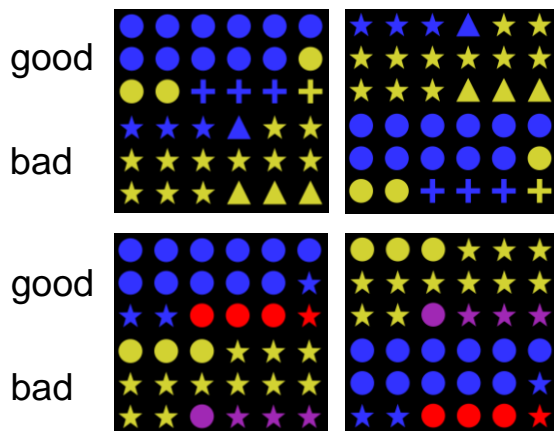

Experiment 2

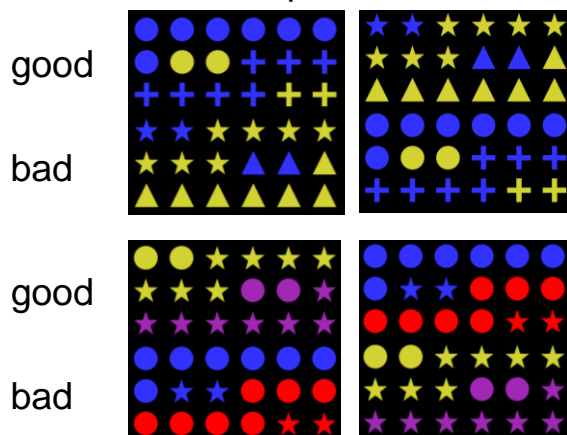

Experiment 5

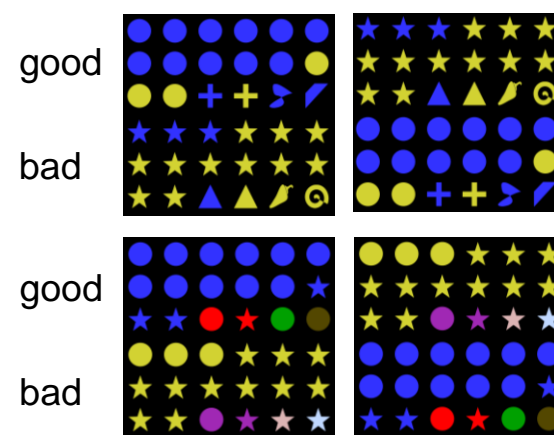

Experiment 3

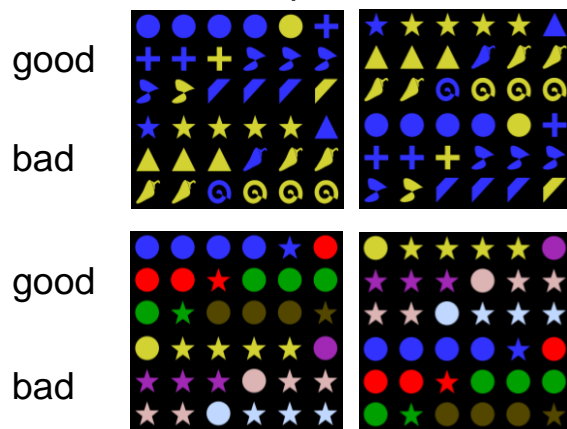

Test

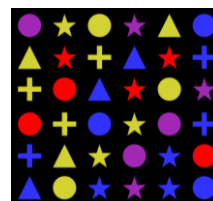

Supplement: supp [file elife-43965-supp-v1.zip › elife_poa_e43965_Figure_2_figure_supplement_1.pdf]
